# Supplementary material for: Stereospecific alkylation of substituted adenines by the Mitsunobu coupling reaction under microwave-assisted conditions
Source: Royal Society of Chemistry journal article supplement (doi:10.1039/c4ra01968g), 2014-01-01
Supplement: c4ra01968g1.pdf [file c4ra01968g1.pdf]

# Supplementary Material

## *RSC Advances*

### **Stereospecific Alkylation of Substituted Adenines by the Mitsunobu Coupling Reaction under Microwave- Assisted Conditions**

María E. García-Rubiño,<sup>a</sup> María C. Núñez,<sup>a</sup> Duane Choquesillo-Lazarte,<sup>b</sup>

Juan M. García-Ruiz,<sup>b</sup> Yolanda Madrid,<sup>c</sup> Joaquín M. Campos,<sup>a\*</sup>

<sup>a</sup>*Departamento de Química Farmacéutica y Orgánica, Facultad de Farmacia, c/ Campus de Cartuja, s/n, 18071*

*Granada (Spain)*

<sup>b</sup>*Laboratorio de Estudios Cristalográficos, Instituto Andaluz de Ciencias de la Tierra (UGR - CSIC), Avenida de las*

*Palmeras N° 4, E-18100 Armilla, Granada (Spain)*

<sup>c</sup>*Centro de Instrumentación Científica, Universidad de Granada, Edificio Mecenas. Campus Universitario de Fuente*

*Nueva. 18071 Granada (Spain).*

| <b>INDEX</b>                                     | <b>Page</b> |
|--------------------------------------------------|-------------|
| Figure S1: ( <i>RS</i> )- <b>12</b> .....        | 4           |
| Figure S2: ( <i>R</i> )- <b>12</b> .....         | 5           |
| Figure S3: ( <i>S</i> )- <b>12</b> .....         | 6           |
| Figure S4: ( <i>RS</i> )- <b>13</b> .....        | 7           |
| Figure S5: ( <i>R</i> )- <b>13</b> .....         | 8           |
| Figure S6: ( <i>S</i> )- <b>13</b> .....         | 9           |
| Figure S7: ( <i>RS</i> )- <b>14</b> .....        | 10          |
| Figure S8: ( <i>S</i> )- <b>14</b> .....         | 11          |
| Figure S9: ( <i>RS</i> )- <b>17</b> .....        | 12          |
| Figure S10: ( <i>R</i> )- <b>17</b> .....        | 13          |
| Figure S11: ( <i>S</i> )- <b>17</b> .....        | 14          |
| Figure S12: ( <i>RS</i> )- <b>18</b> .....       | 15          |
| Figure S13: ( <i>R</i> )- <b>18</b> .....        | 16          |
| Figure S14: ( <i>S</i> )- <b>18</b> .....        | 17          |
| Figure S15: ( <i>RS</i> )- <b>22</b> .....       | 18          |
| Figure S16: ( <i>R</i> )- <b>22</b> .....        | 19          |
| Figure S17: ( <i>S</i> )- <b>22</b> .....        | 20          |
| Figure S18: ( <i>RS</i> )- <b>23</b> .....       | 21          |
| Figure S19: ( <i>R</i> )- <b>23</b> .....        | 22          |
| Figure S20: ( <i>S</i> )- <b>23</b> .....        | 23          |
| Figure S21: ( <i>RS</i> )- <b>24</b> .....       | 24          |
| Figure S22: ( <i>R</i> )- <b>24</b> .....        | 25          |
| Figure S23: ( <i>S</i> )- <b>24</b> .....        | 26          |
| <sup>1</sup> H NMR spectrum of <b>17</b> :.....  | 27          |
| <sup>13</sup> C NMR spectrum of <b>17</b> :..... | 28          |
| DEPT spectrum of <b>17</b> :.....                | 29          |
| HSQC spectrum of <b>17</b> :.....                | 30          |
| HMBC spectrum of <b>17</b> :.....                | 31          |
| <sup>1</sup> H NMR spectrum of <b>18</b> :.....  | 32          |
| <sup>13</sup> C NMR spectrum of <b>18</b> :..... | 33          |

|                                                              |           |
|--------------------------------------------------------------|-----------|
| DEPT spectrum of <b>18</b> : .....                           | <b>34</b> |
| HSQC spectrum of <b>18</b> : .....                           | <b>35</b> |
| HMBC spectrum of <b>18</b> : .....                           | <b>36</b> |
| <sup>1</sup> H NMR spectrum of <b>22</b> :.....              | <b>37</b> |
| <sup>13</sup> C NMR spectrum of <b>22</b> : .....            | <b>38</b> |
| DEPT spectrum of <b>22</b> : .....                           | <b>39</b> |
| HSQC spectrum of <b>22</b> : .....                           | <b>40</b> |
| HMBC spectrum of <b>22</b> : .....                           | <b>41</b> |
| <sup>1</sup> H NMR spectrum of <b>23</b> :.....              | <b>42</b> |
| <sup>13</sup> C NMR spectrum of <b>23</b> : .....            | <b>43</b> |
| DEPT spectrum of <b>23</b> : .....                           | <b>44</b> |
| HSQC spectrum of <b>23</b> : .....                           | <b>45</b> |
| HMBC spectrum of <b>23</b> : .....                           | <b>46</b> |
| <sup>1</sup> H NMR spectrum of <b>24</b> :.....              | <b>47</b> |
| <sup>13</sup> C NMR spectrum of <b>24</b> : .....            | <b>48</b> |
| DEPT spectrum of <b>24</b> : .....                           | <b>49</b> |
| HSQC spectrum of <b>24</b> : .....                           | <b>50</b> |
| HMBC spectrum of <b>24</b> : .....                           | <b>51</b> |
| Figure S24: Crystal Structure ( <i>RS</i> )- <b>17</b> ..... | <b>52</b> |
| Figure S25: Crystal Structure ( <i>RS</i> )- <b>17</b> ..... | <b>53</b> |
| Figure S26: Crystal Structure ( <i>R</i> )- <b>22</b> .....  | <b>54</b> |
| Figure S27: Crystal Structure ( <i>R</i> )- <b>22</b> .....  | <b>54</b> |
| Figure S28: Crystal Structure ( <i>RS</i> )- <b>24</b> ..... | <b>55</b> |
| Figure S29: Crystal Structure ( <i>RS</i> )- <b>24</b> ..... | <b>56</b> |

CHIRALPAK IA 250 x 4.6 mm  
Flow rate: 1ml/min  
room temperature  
PDA 250.0 nm  
n-hexane/dichloromethane 65/35 v/v

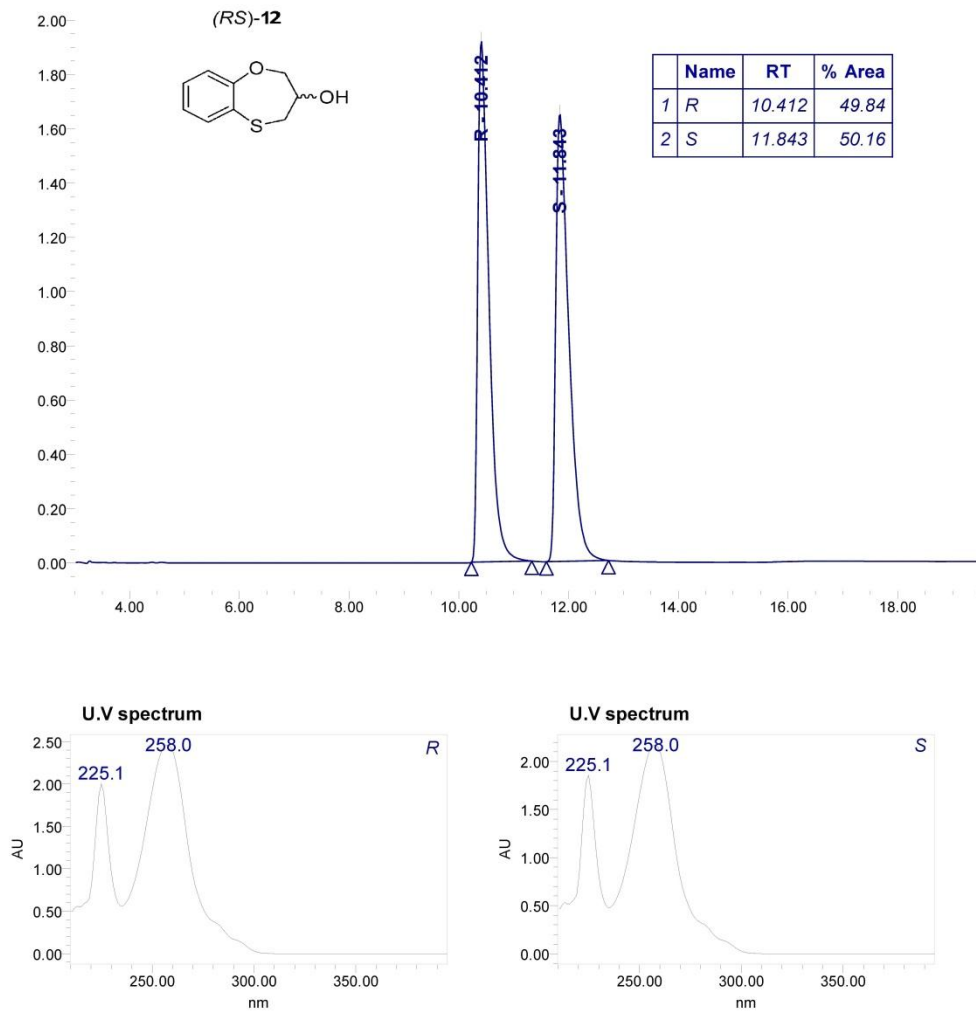

Figure S1

CHIRALPAK IA 250 x 4.6 mm  
Flow rate: 1 ml/min  
room temperature  
PDA 250.0 nm  
n-hexane/dichloromethane 65/35 v/v

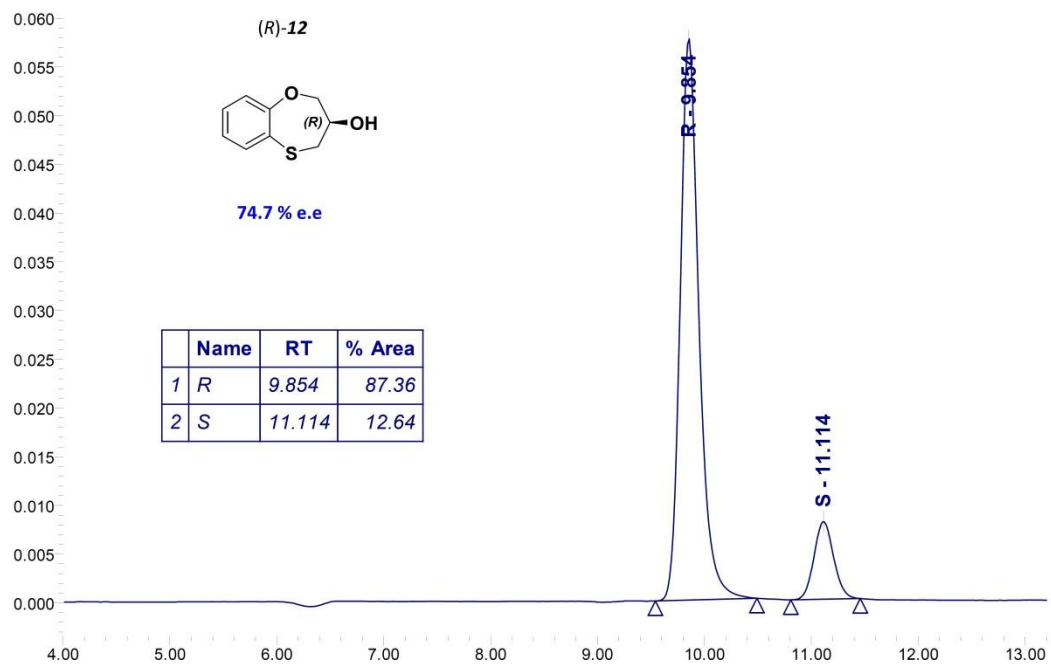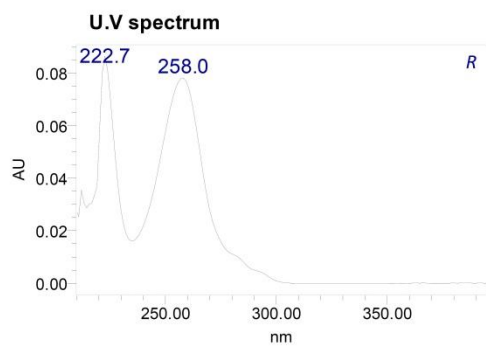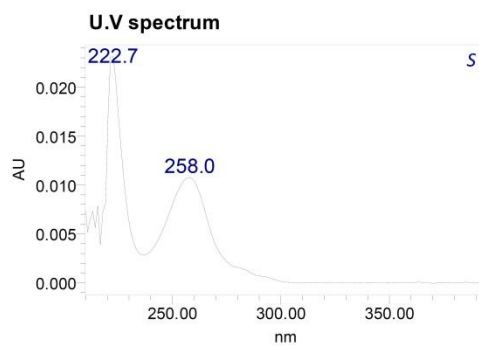

Figure S2

CHIRALPAK IA 250 x 4.6 mm  
Flow rate: 1ml/min  
room temperature  
PDA 250.0 nm  
n-hexane/dichloromethane 65/35 v/v

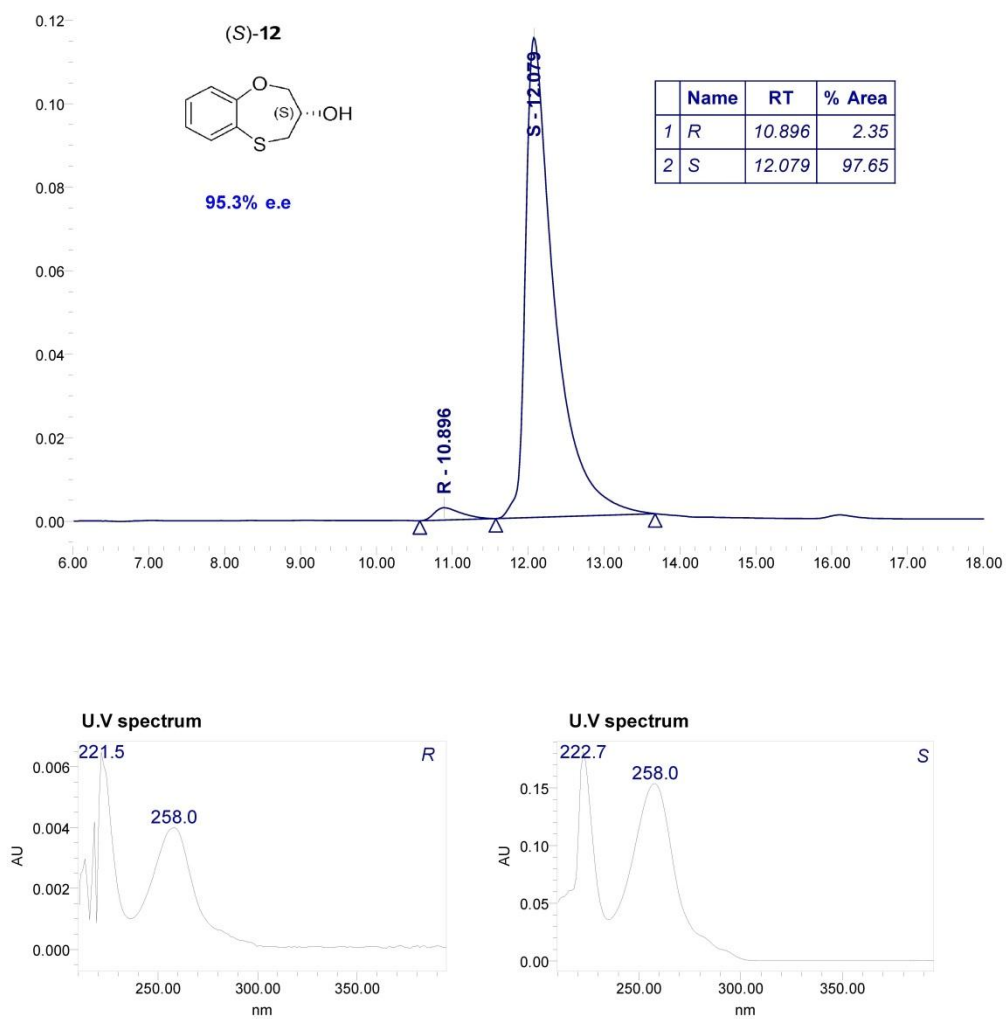

Figure S3

CHIRALPAK IA 250 x 4.6 mm  
Flow rate: 1ml/min  
room temperature  
PDA 250.0 nm  
n-hexane/dichloromethane 65/35 v/v

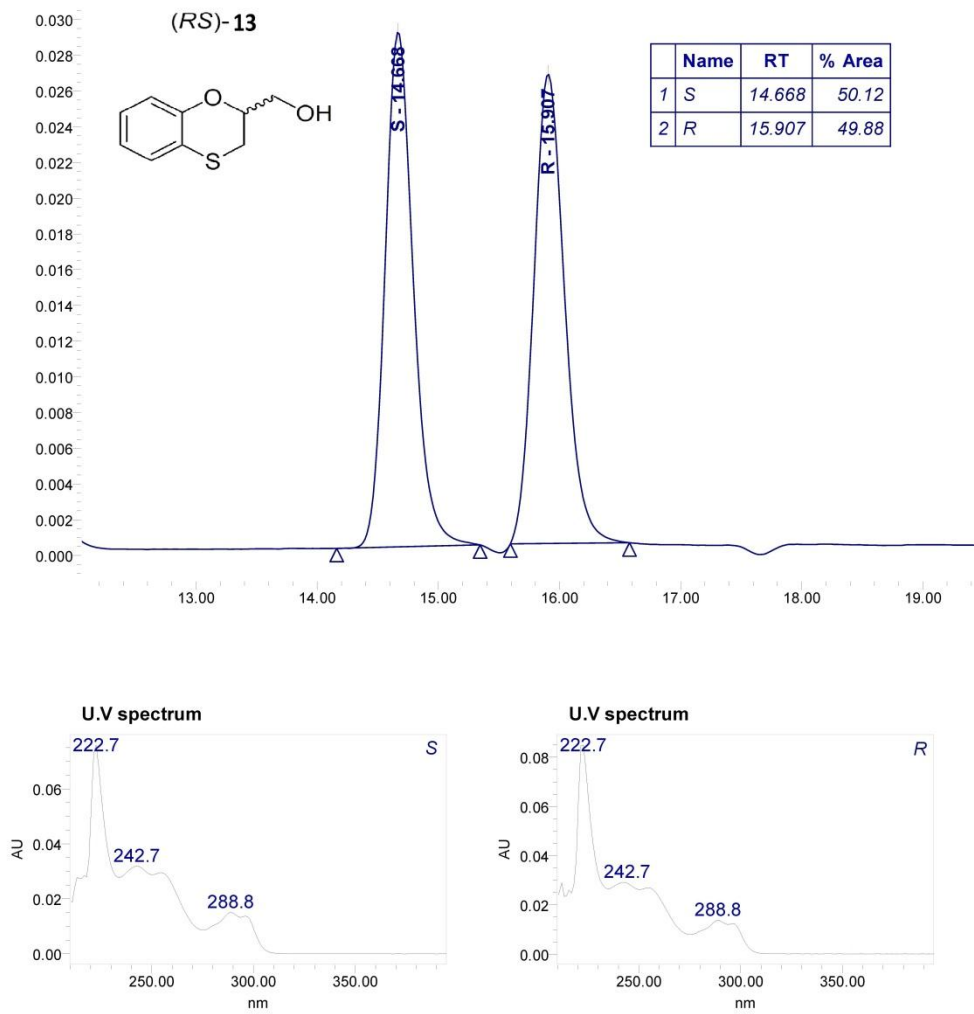

Figure S4

CHIRALPAK IA 250 x 4.6 mm  
Flow rate: 1ml/min  
room temperature  
PDA 250.0 nm  
n-hexane/dichloromethane 65/35 v/v

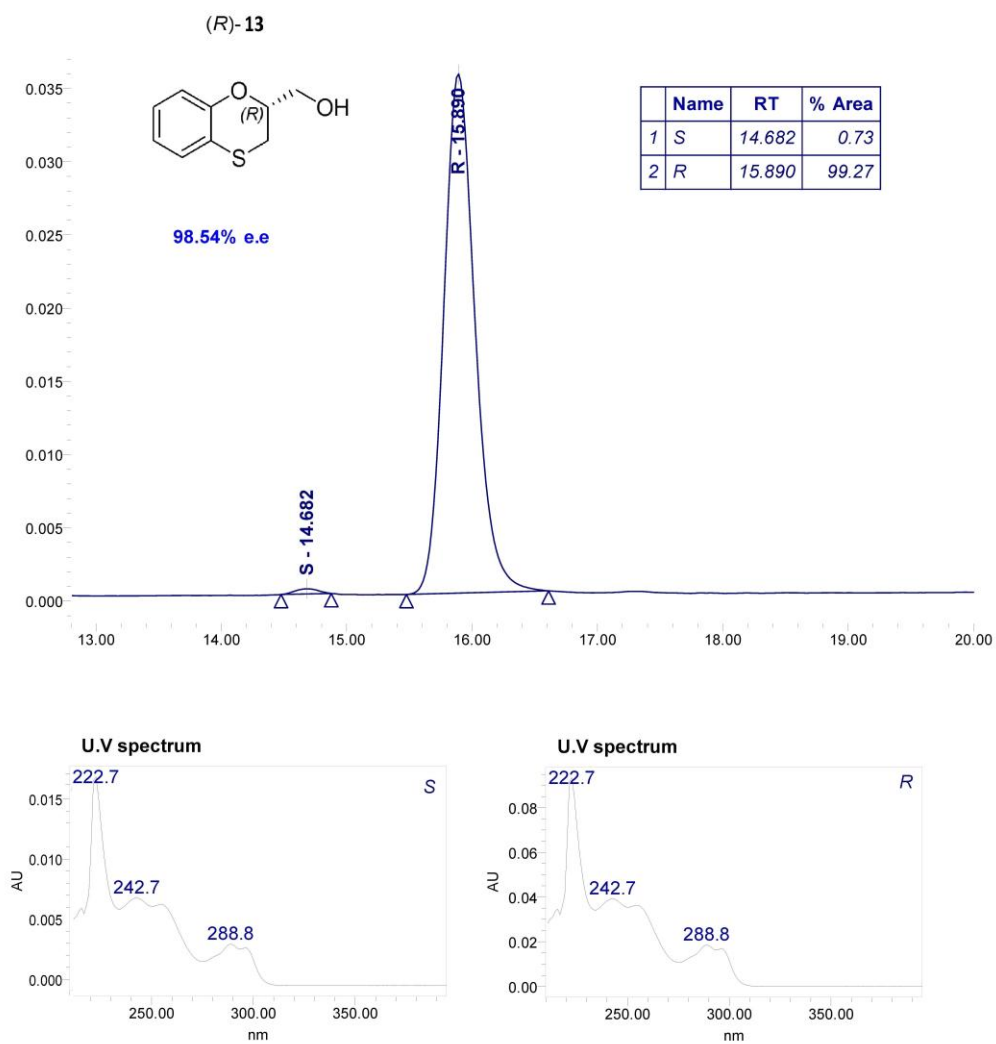

Figure S5



CHIRALPAK IA 250 x 4.6 mm  
Flow rate: 1ml/min  
room temperature  
PDA 250.0 nm  
n-hexane/dichloromethane 65/35 v/v

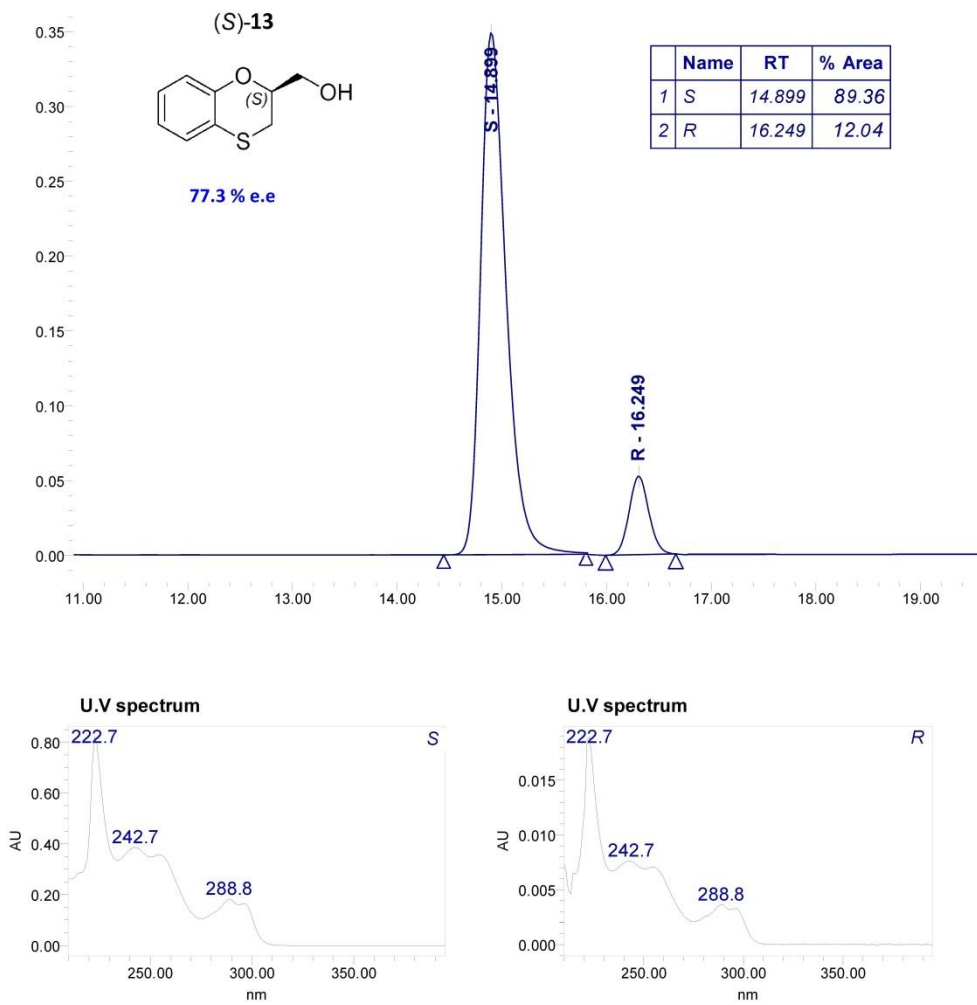

Figure S6

CHIRALPAK IA 250 x 4.6 mm  
Flow rate: 1ml/min  
room temperature  
PDA 250.0 nm  
n-hexane/2-propanol 90/10 v/v

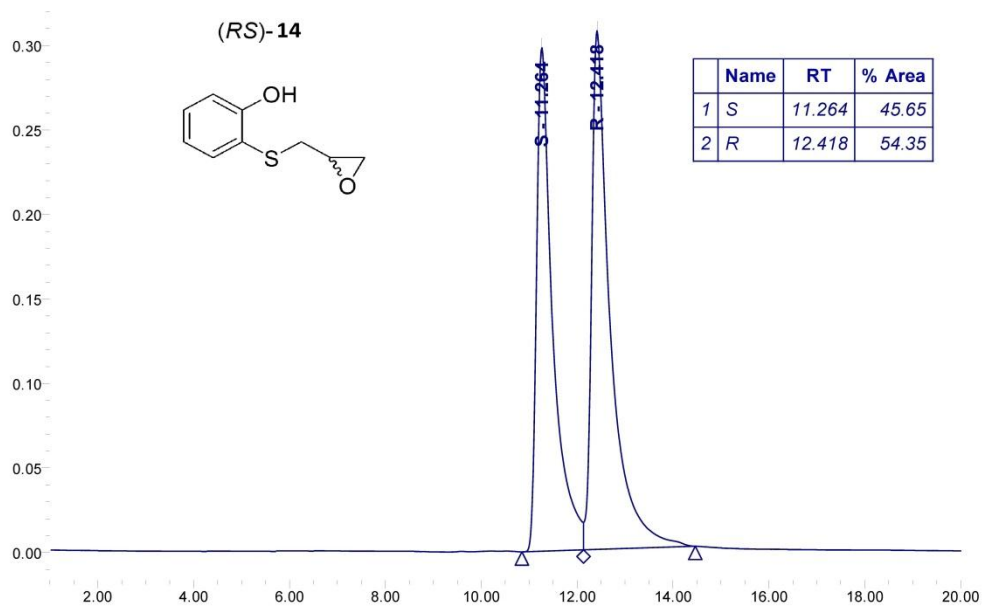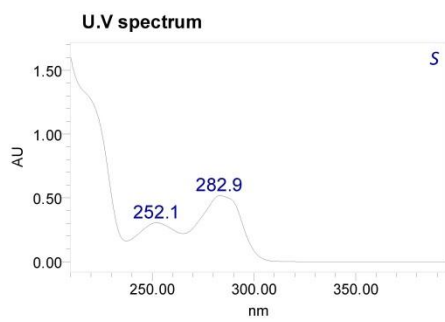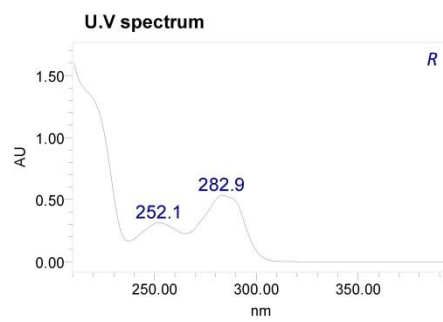

Figure S7

CHIRALPAK IA 250 x 4.6 mm  
Flow rate: 1ml/min  
room temperature  
PDA 250.0 nm  
n-hexane/2-propanol 90/10 v/v

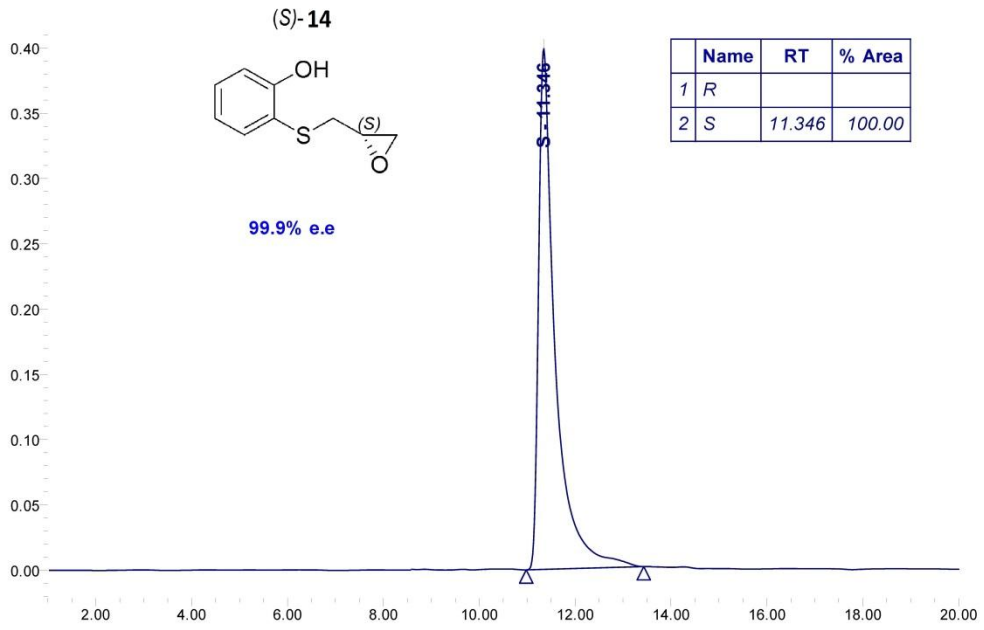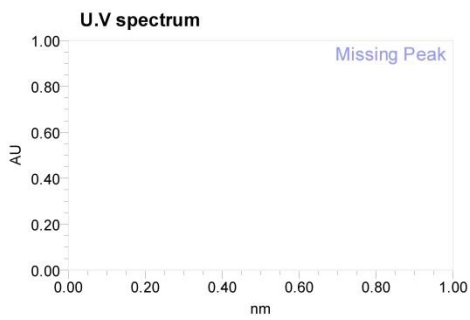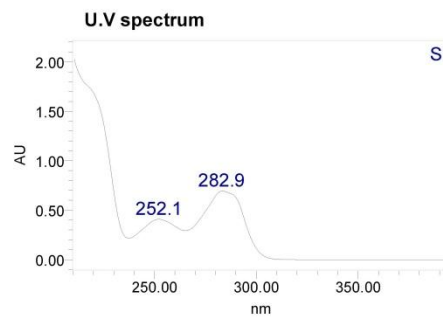

Figure S8

CHIRALPAK IA 250 x 4.6 mm  
Flow rate: 1ml/min  
room temperature  
PDA 250.0 nm  
n-hexane/ethanol 80/20 v/v

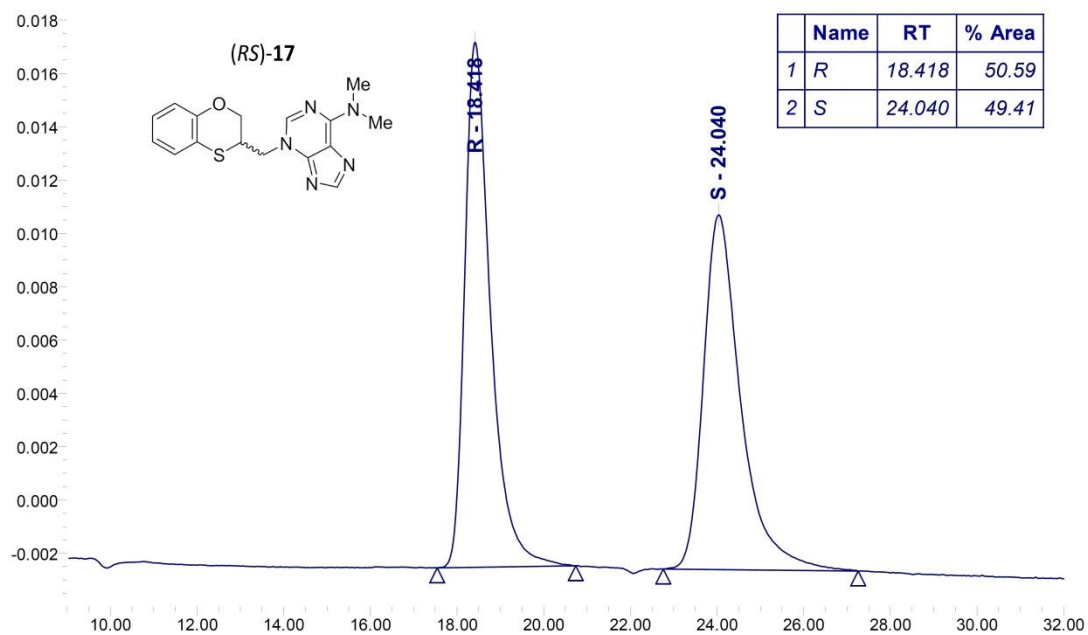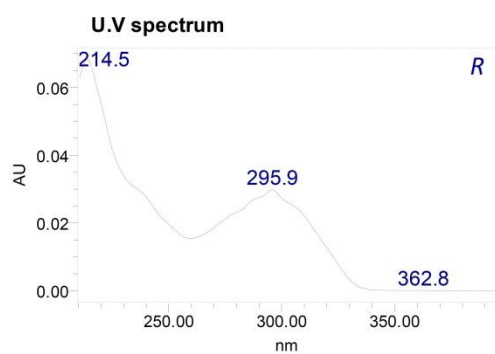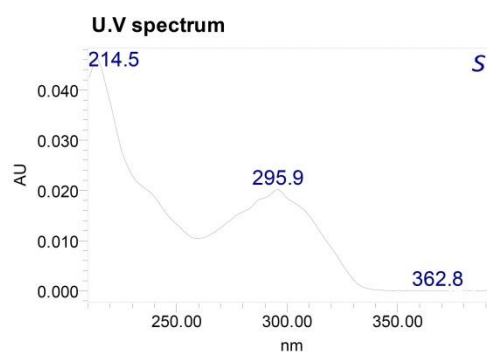

Figure S9

CHIRALPAK IA 250 x 4.6 mm  
Flow rate: 1ml/min  
room temperature  
PDA 250.0 nm  
n-hexane/ethanol 80/20 v/v

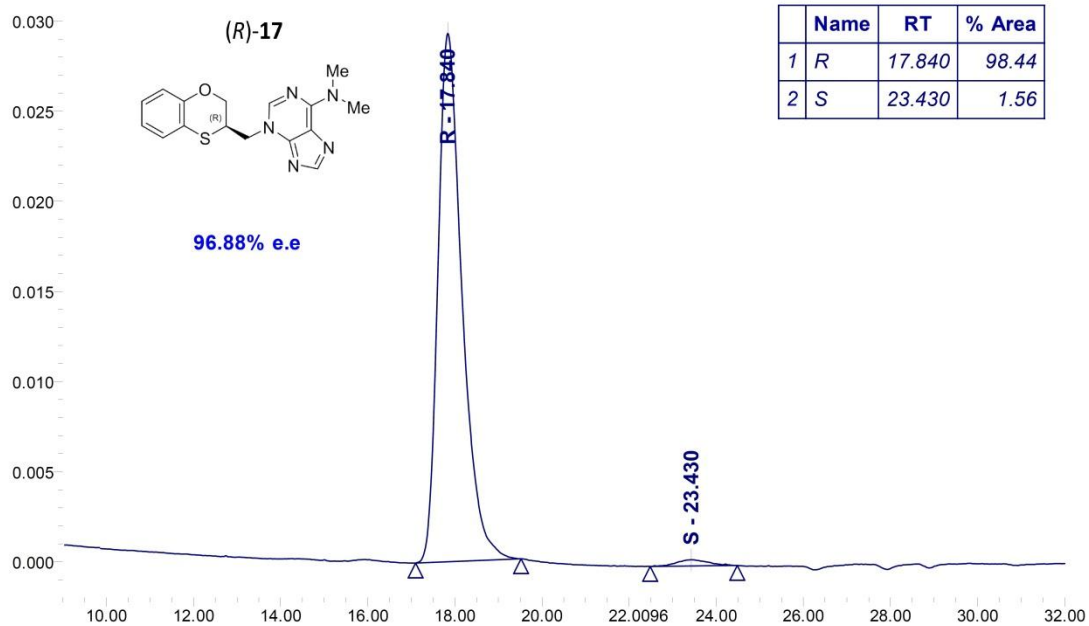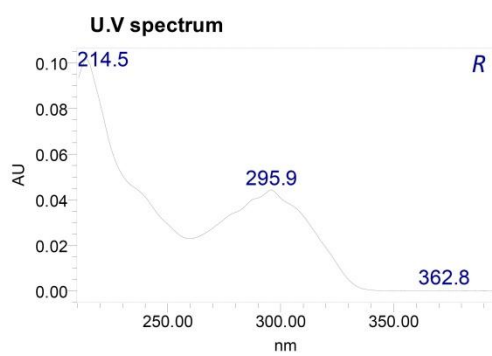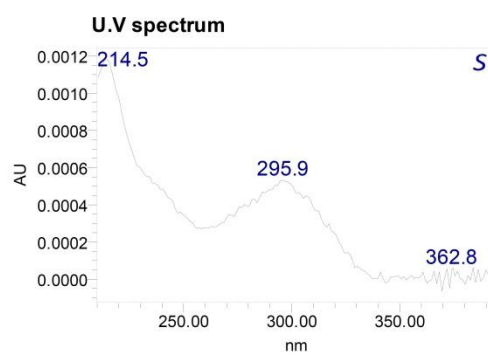

Figure S10

CHIRALPAK IA 250 x 4.6 mm  
Flow rate: 1ml/min  
room temperature  
PDA 250.0 nm  
n-hexane/ethanol 80/20 v/v

|   | Name | RT     | % Area |
|---|------|--------|--------|
| 1 | R    | 18.242 | 12.00  |
| 2 | S    | 23.055 | 88.00  |

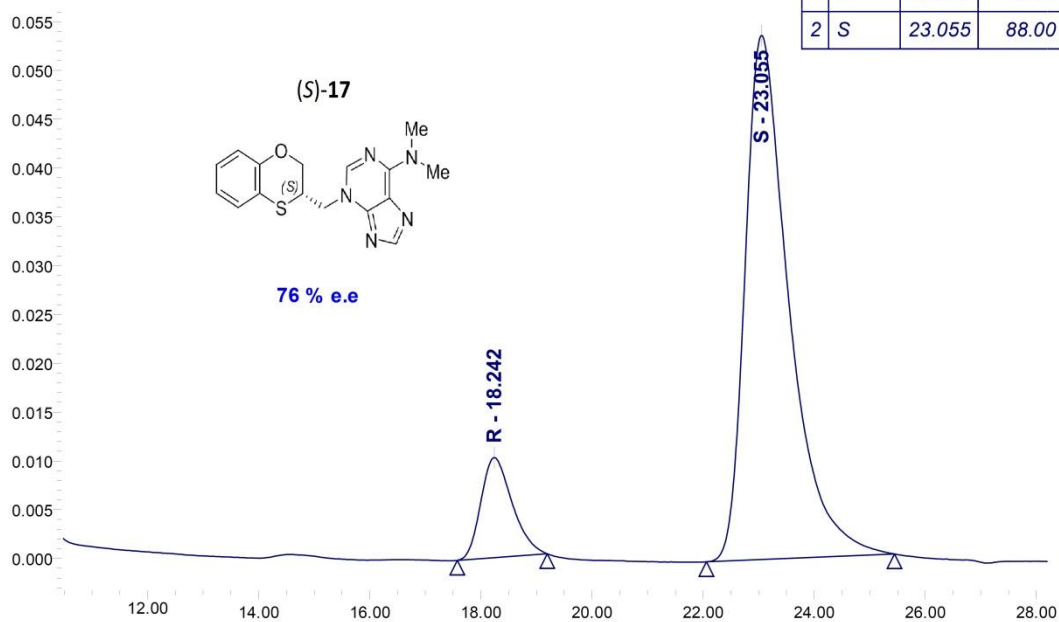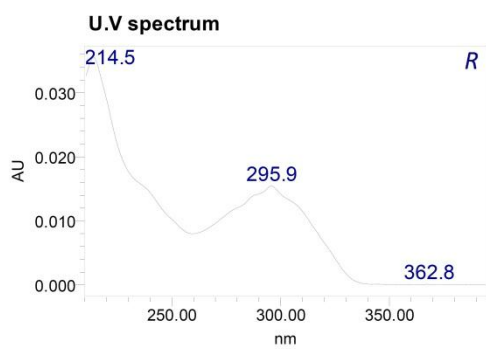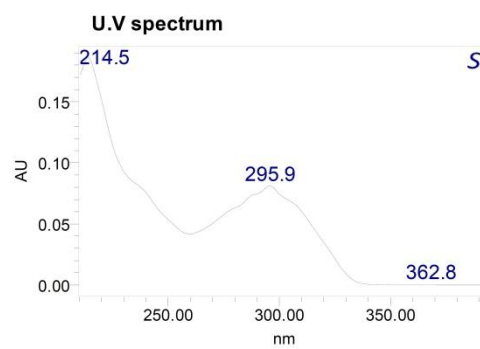

Figure S11

CHIRALPAK IA 250 x 4.6 mm  
Flow rate: 1ml/min  
room temperature  
PDA 250.0 nm  
n-hexane/ethanol 80/20 v/v

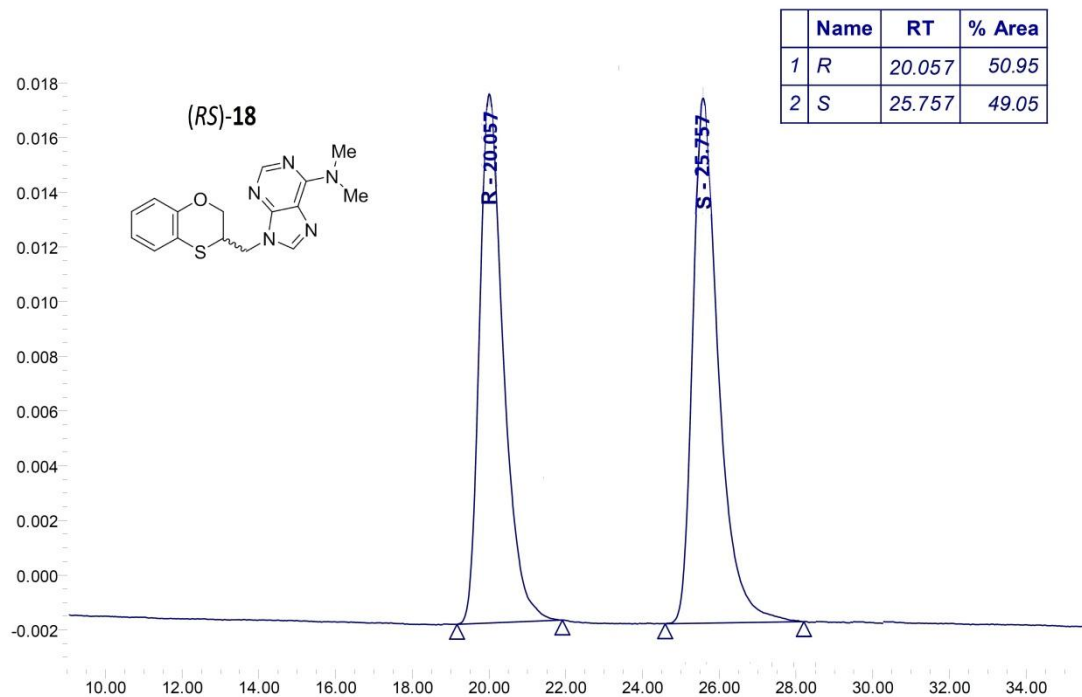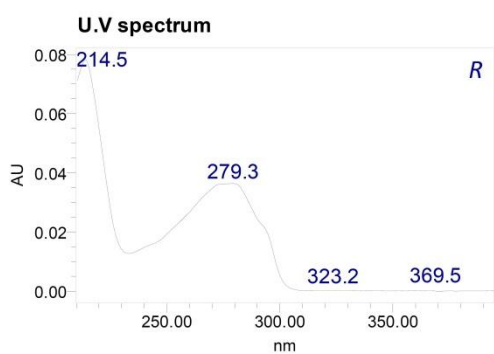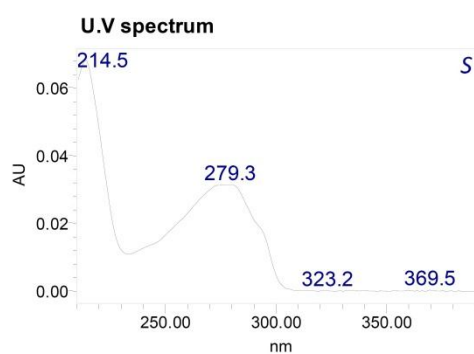

Figure S12

CHIRALPAK IA 250 x 4.6 mm  
Flow rate: 1ml/min  
room temperature  
PDA 250.0 nm  
n-hexane/ethanol 80/20 v/v

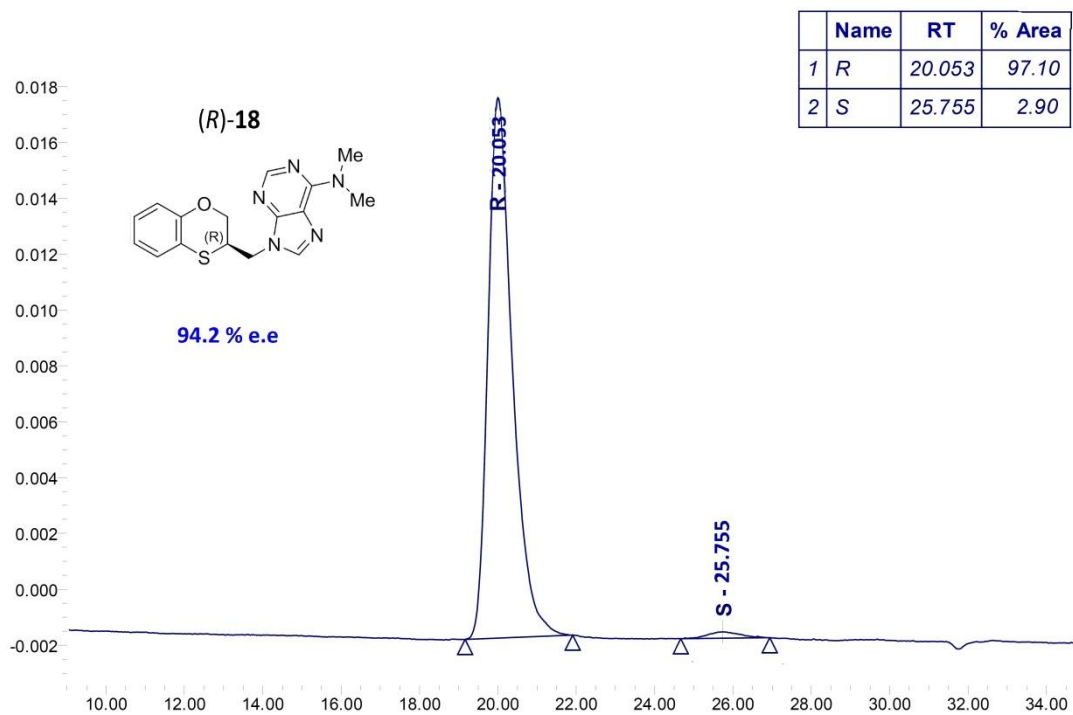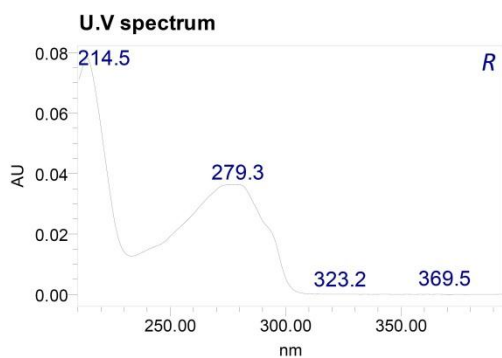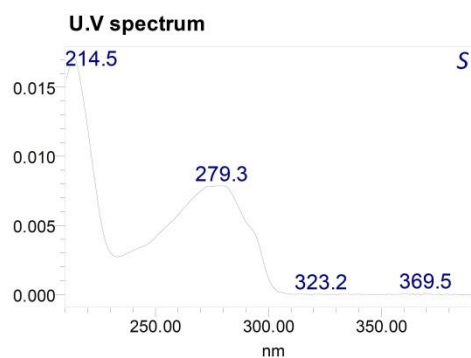

Figure S13



CHIRALPAK IA 250 x 4.6 mm  
Flow rate: 1ml/min  
room temperature  
PDA 250.0 nm  
n-hexane/ethanol 80/20 v/v

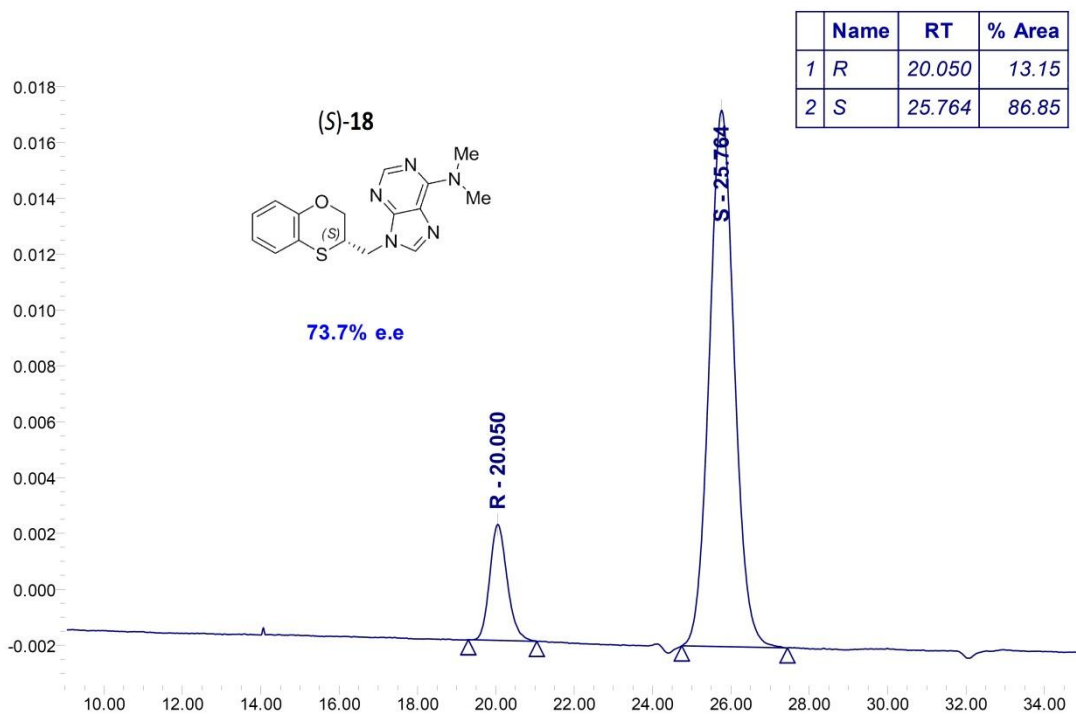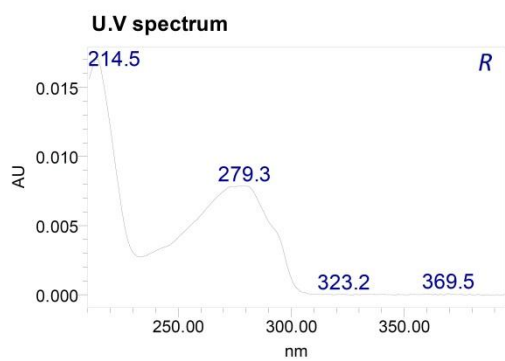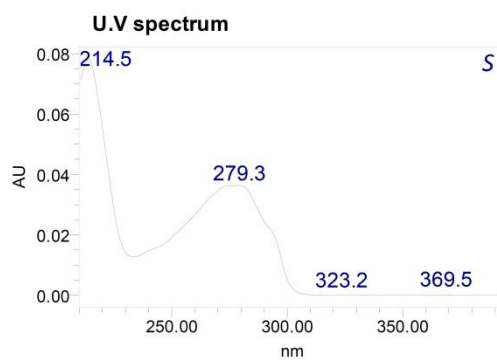

Figure S14

CHIRALPAK IA 250 x 4.6 mm  
Flow rate: 1ml/min  
room temperature  
PDA 250.0 nm  
n-hexane/ethanol 80/20 v/v

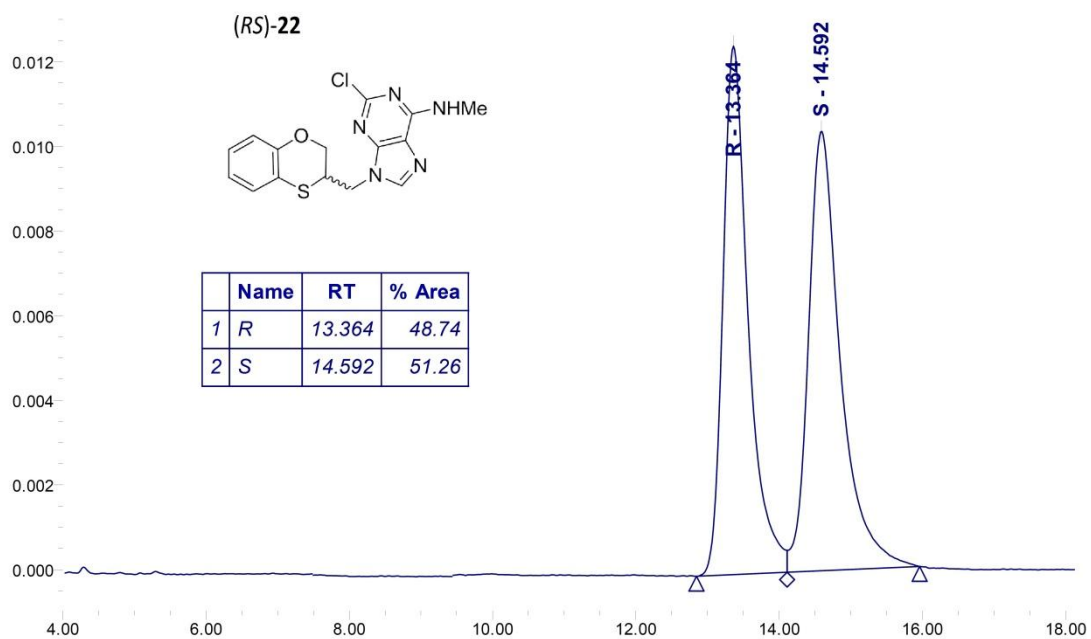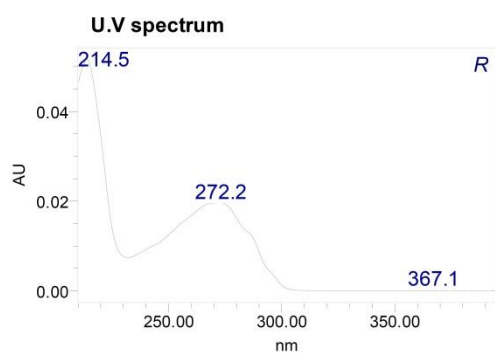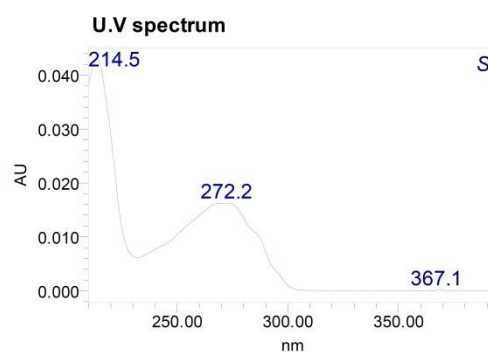

Figure S15

CHIRALPAK IA 250 x 4.6 mm  
Flow rate: 1ml/min  
room temperature  
PDA 250.0 nm  
n-hexane/ethanol 80/20 v/v

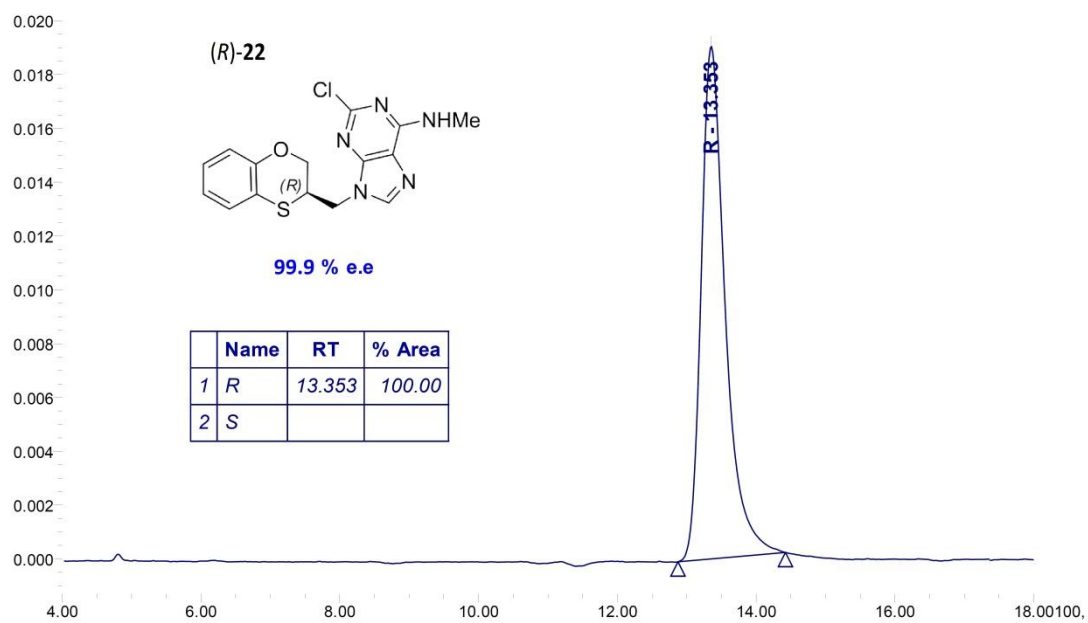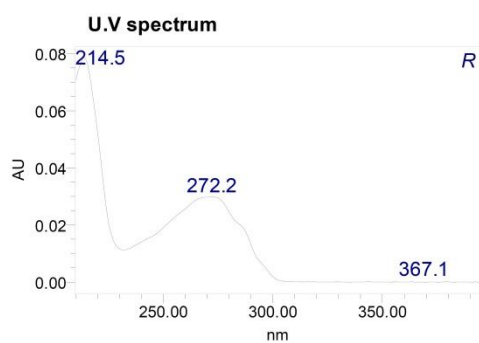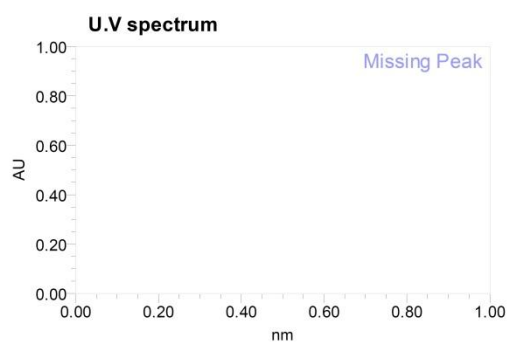

Figure S16

CHIRALPAK IA 250 x 4.6 mm  
Flow rate: 1ml/min  
room temperature  
PDA 250.0 nm  
n-hexane/ethanol 80/20 v/v

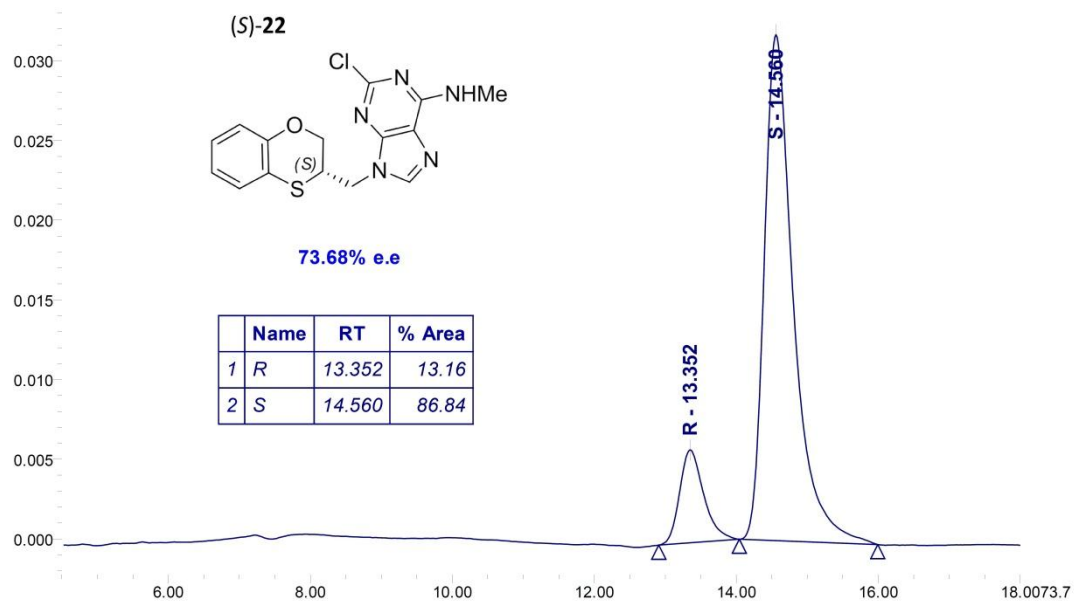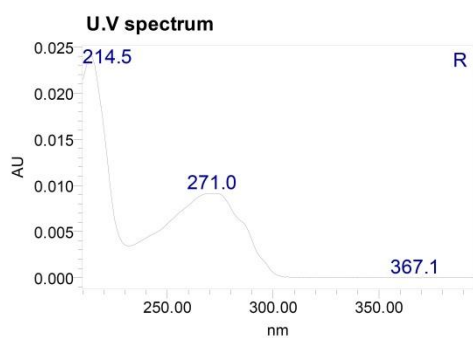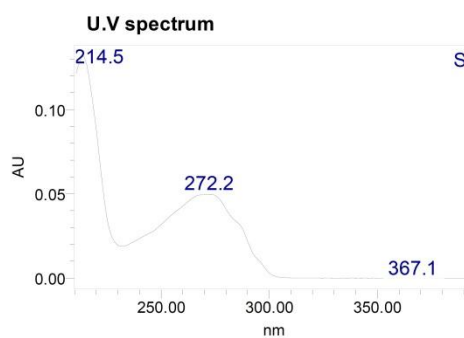

Figure S17

CHIRALPAK IA 250 x 4.6 mm  
Flow rate: 1ml/min  
room temperature  
PDA 250.0 nm  
n-hexane/ethanol 80/20 v/v

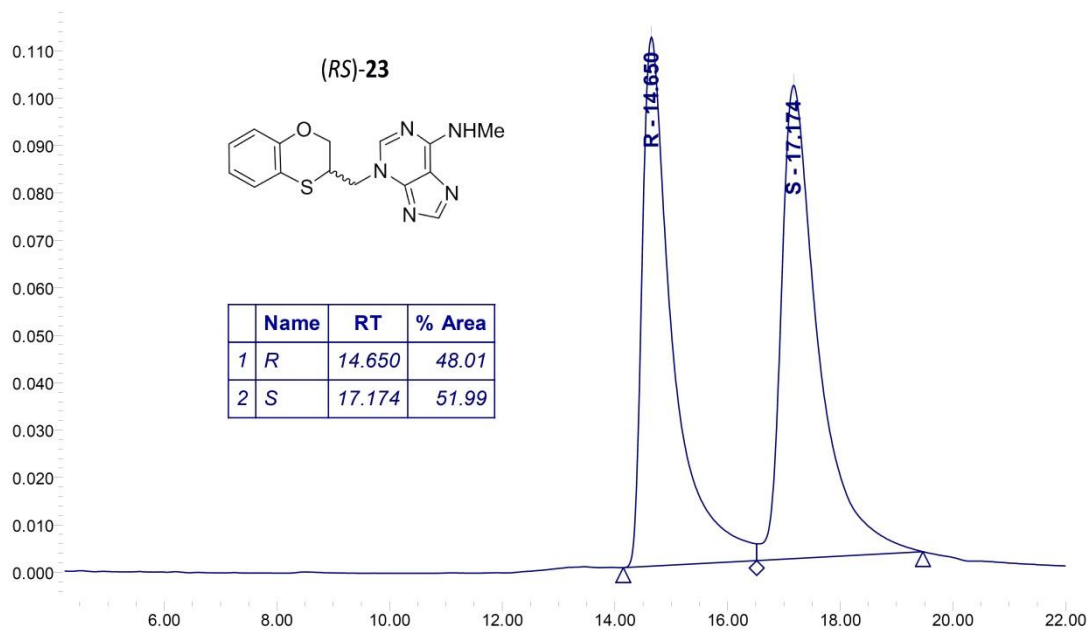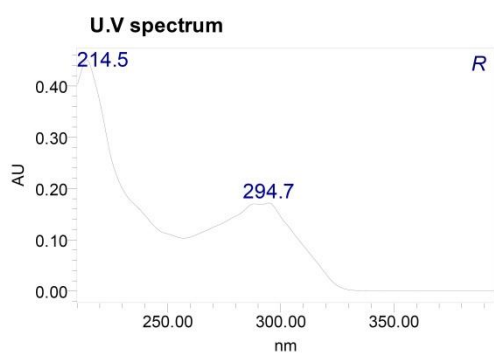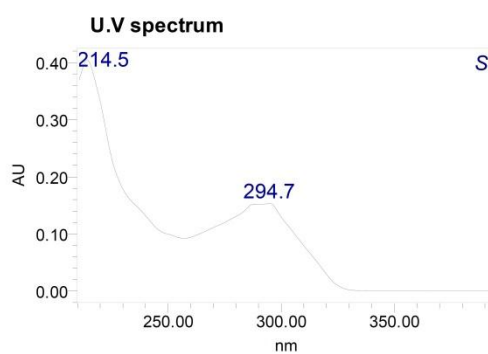

Figure S18

CHIRALPAK IA 250 x 4.6 mm  
Flow rate: 1ml/min  
room temperature  
PDA 250.0 nm  
n-hexane/ethanol 80/20 v/v

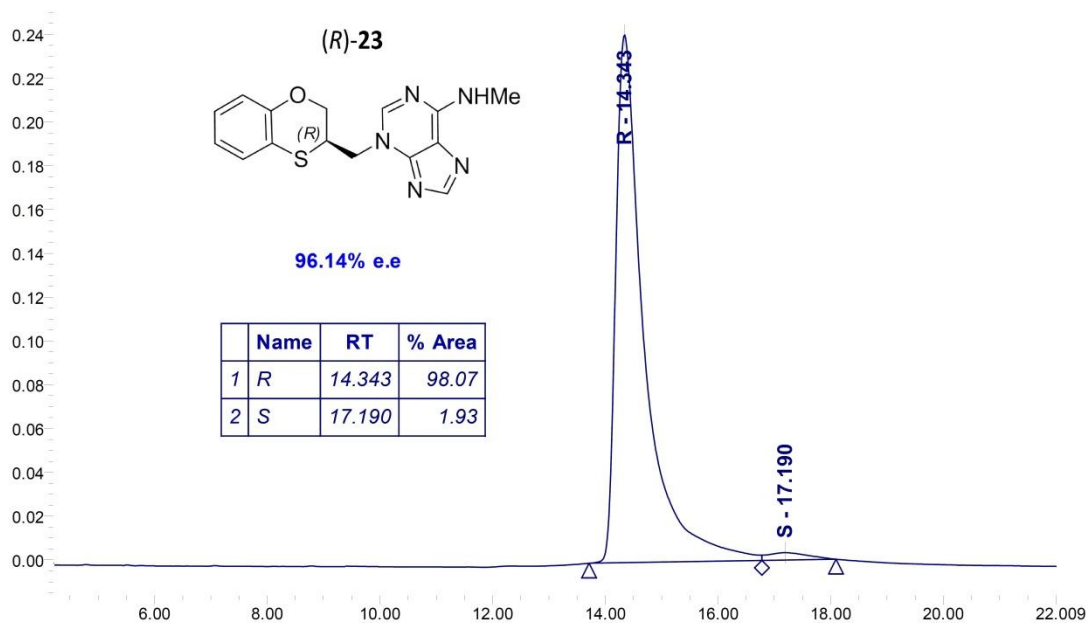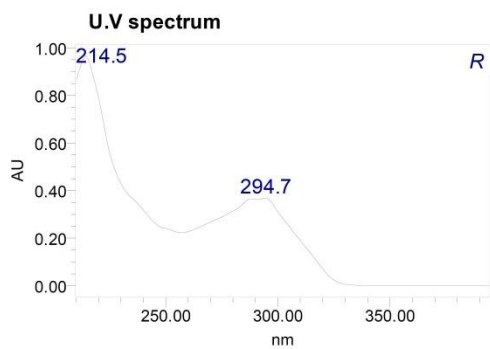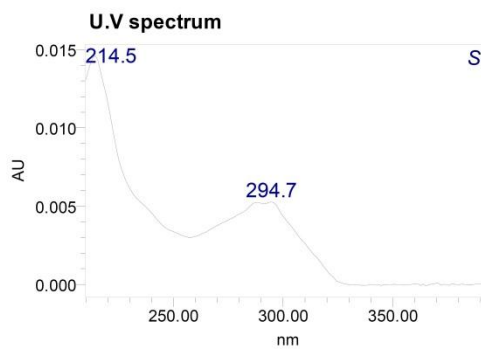

Figure S19

CHIRALPAK IA 250 x 4.6 mm  
Flow rate: 1ml/min  
room temperature  
PDA 250.0 nm  
n-hexane/ethanol 80/20 v/v

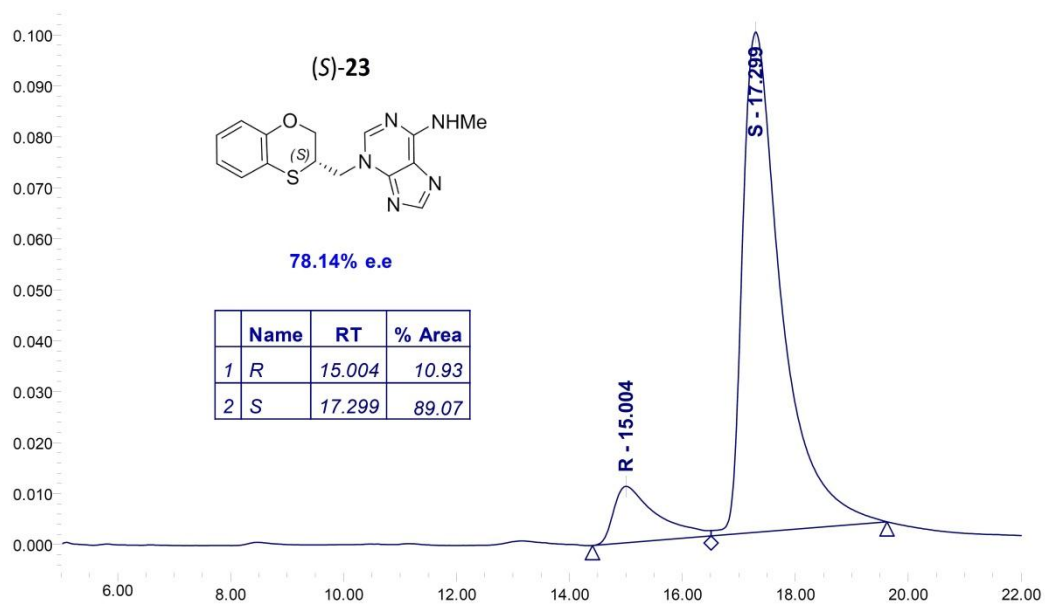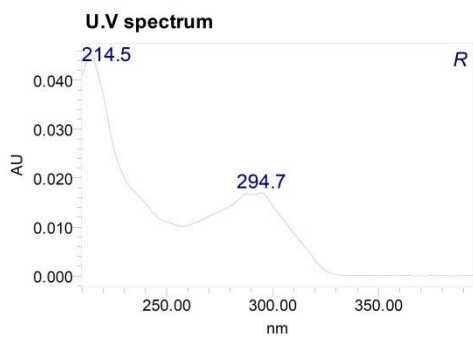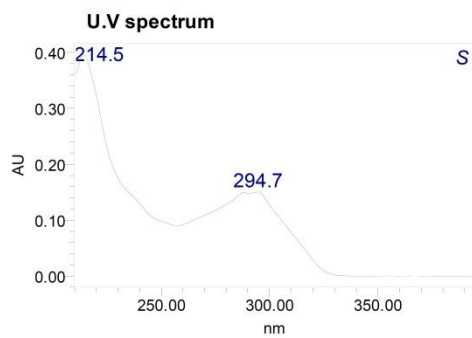

Figure S20

CHIRALPAK IA 250 x 4.6 mm  
Flow rate: 1ml/min  
room temperature  
PDA 250.0 nm  
n-hexane/ethanol 80/20 v/v

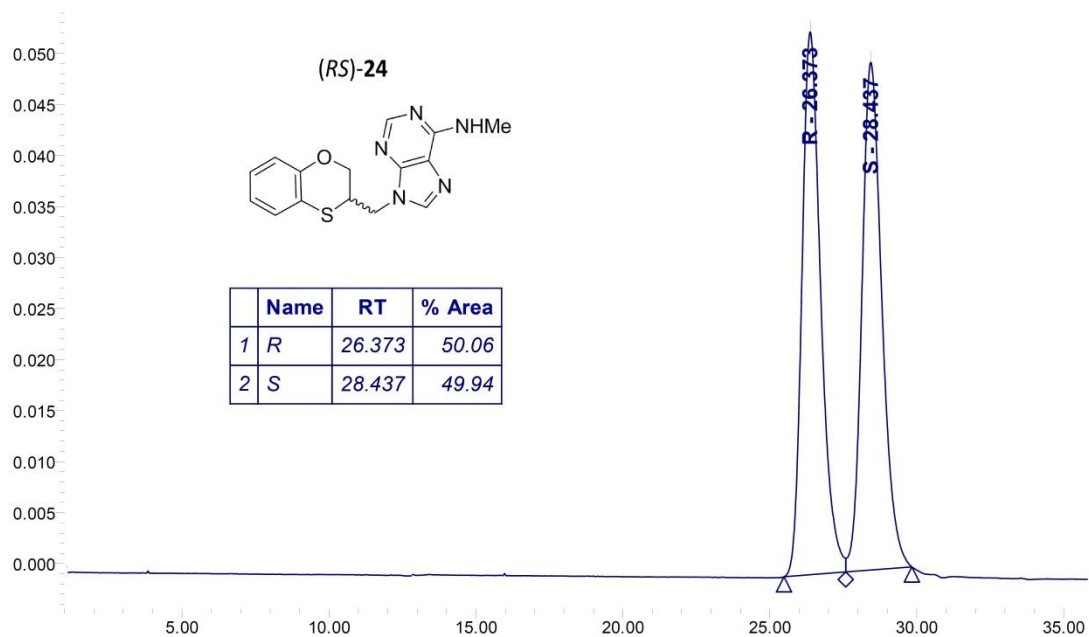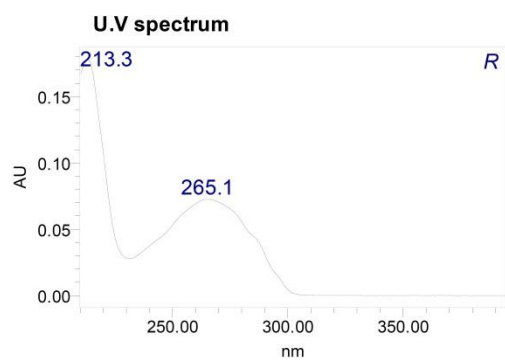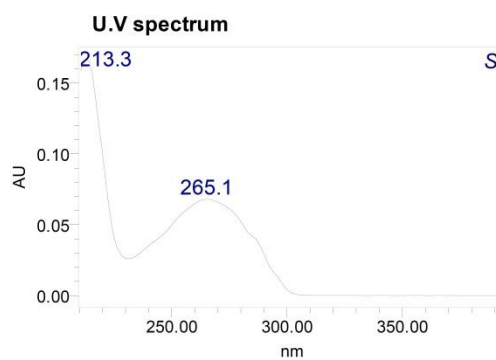

Figure S21



CHIRALPAK IA 250 x 4.6 mm  
Flow rate: 1ml/min  
room temperature  
PDA 250.0 nm  
n-hexane/ethanol 80/20 v/v

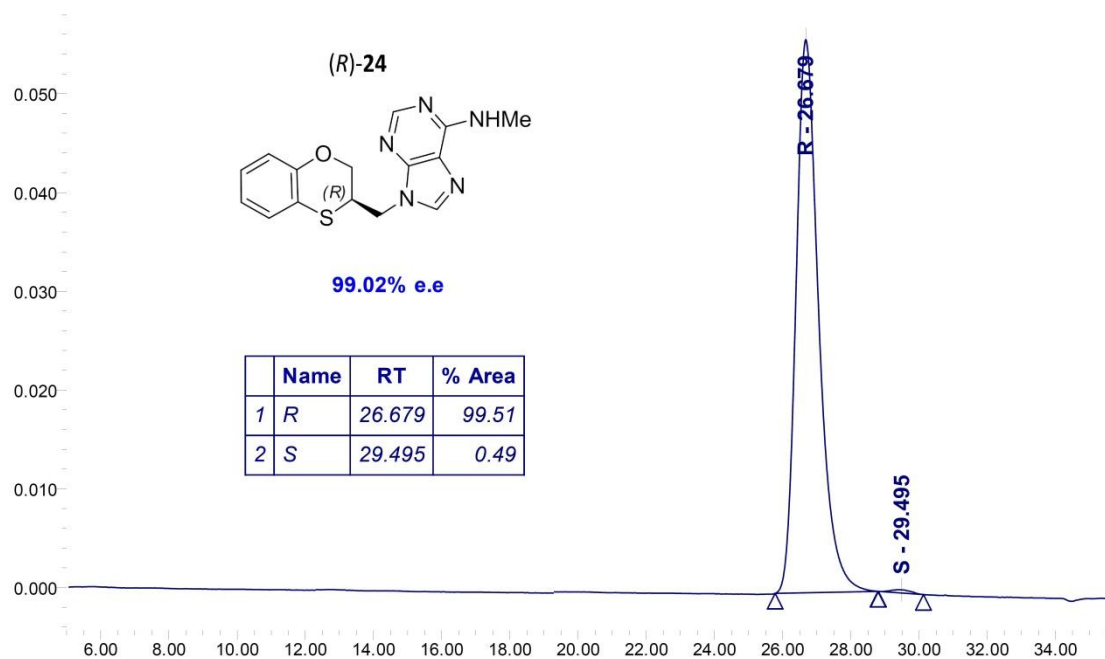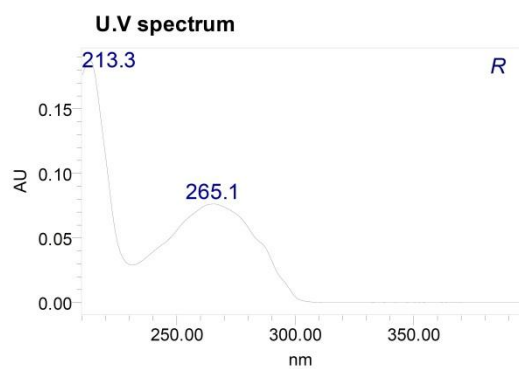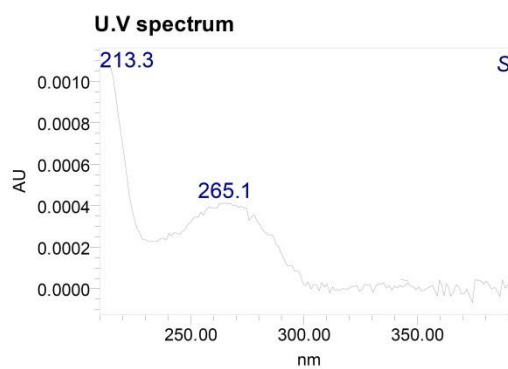

Figure S22

CHIRALPAK IA 250 x 4.6 mm  
Flow rate: 1ml/min  
room temperature  
PDA 250.0 nm  
n-hexane/ethanol 80/20 v/v

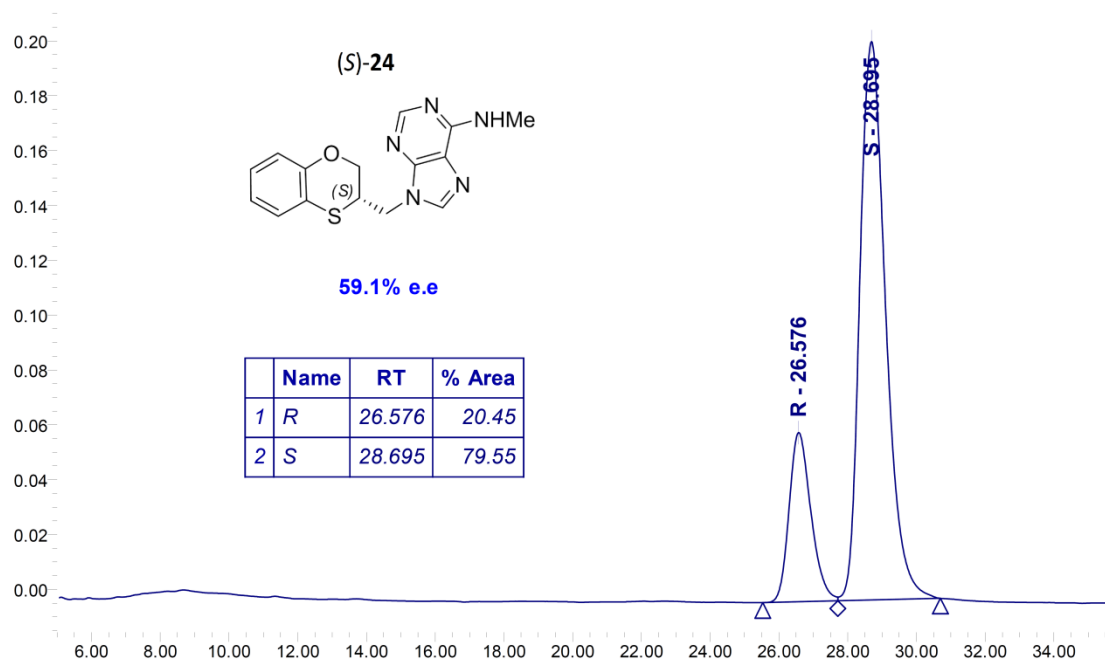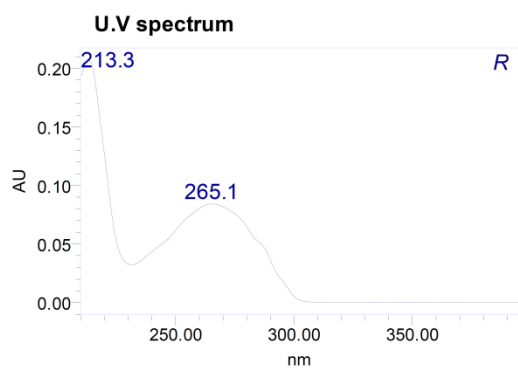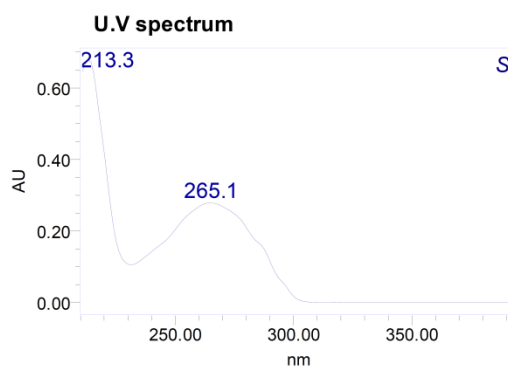

Figure S23

500 MHz, CDCl<sub>3</sub>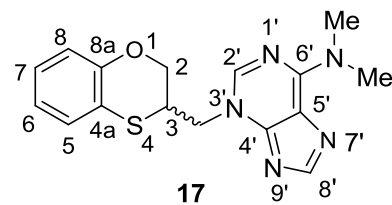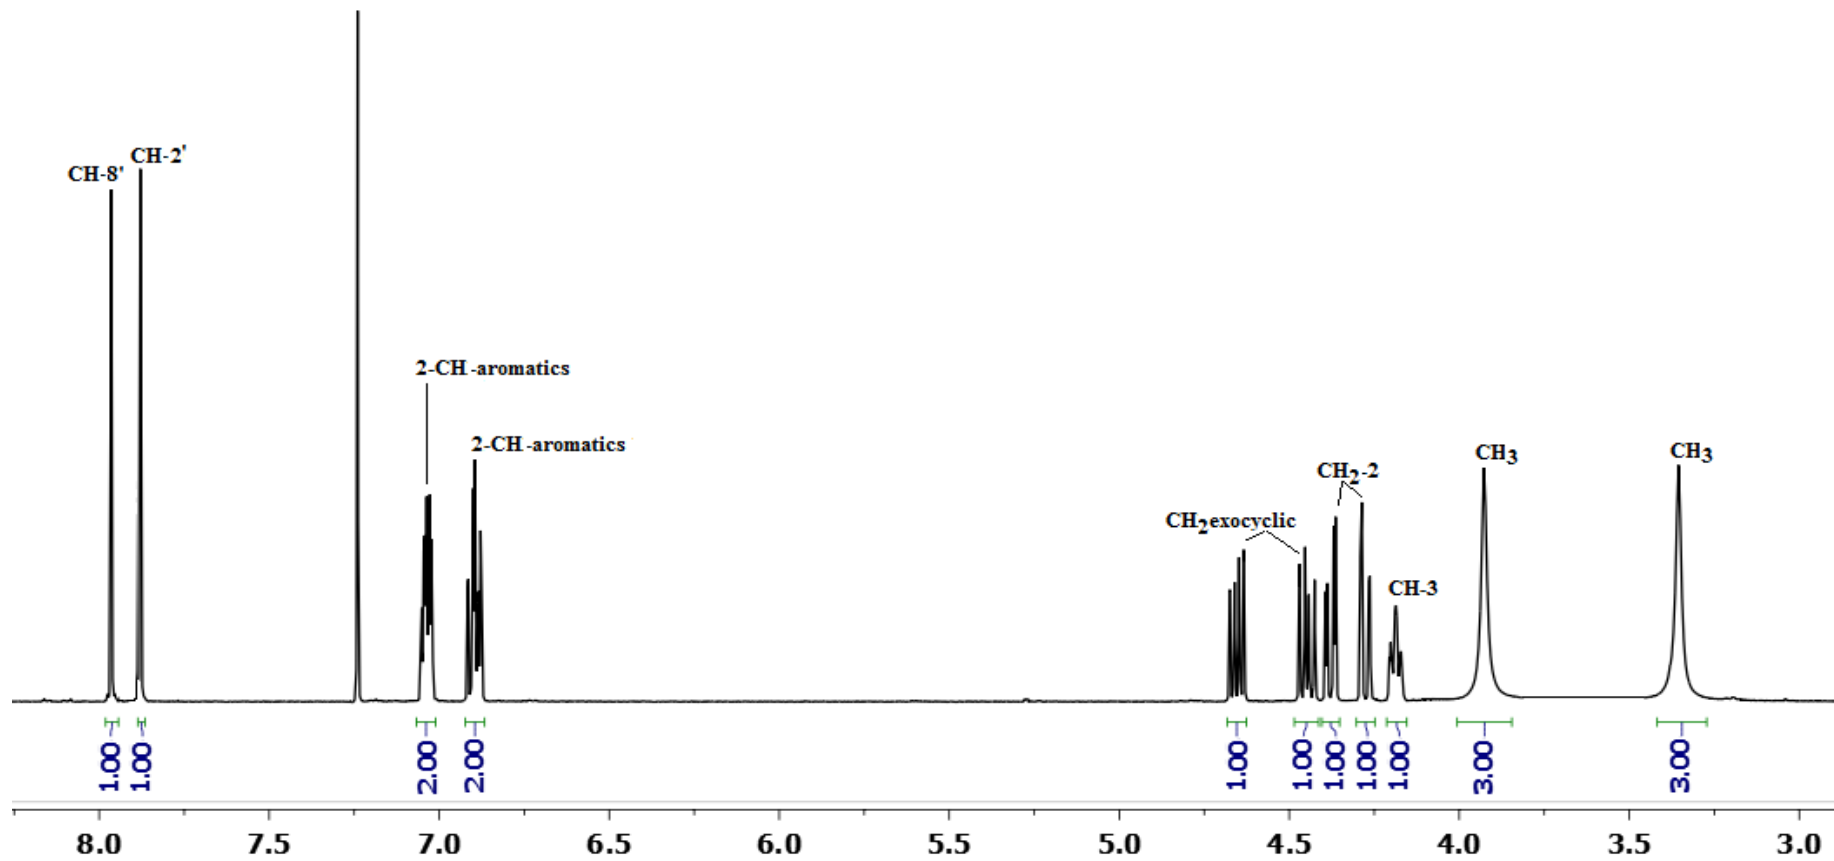

500 MHz, CDCl<sub>3</sub>

153.85  
152.74  
151.27  
150.11  
— 141.92

128.15  
126.38  
122.74  
122.02  
118.91  
115.92

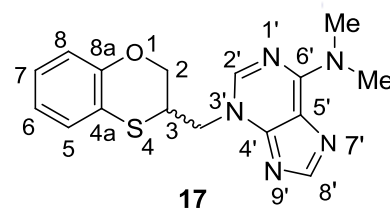

— 66.14

— 51.77

39.95  
38.23  
— 36.99

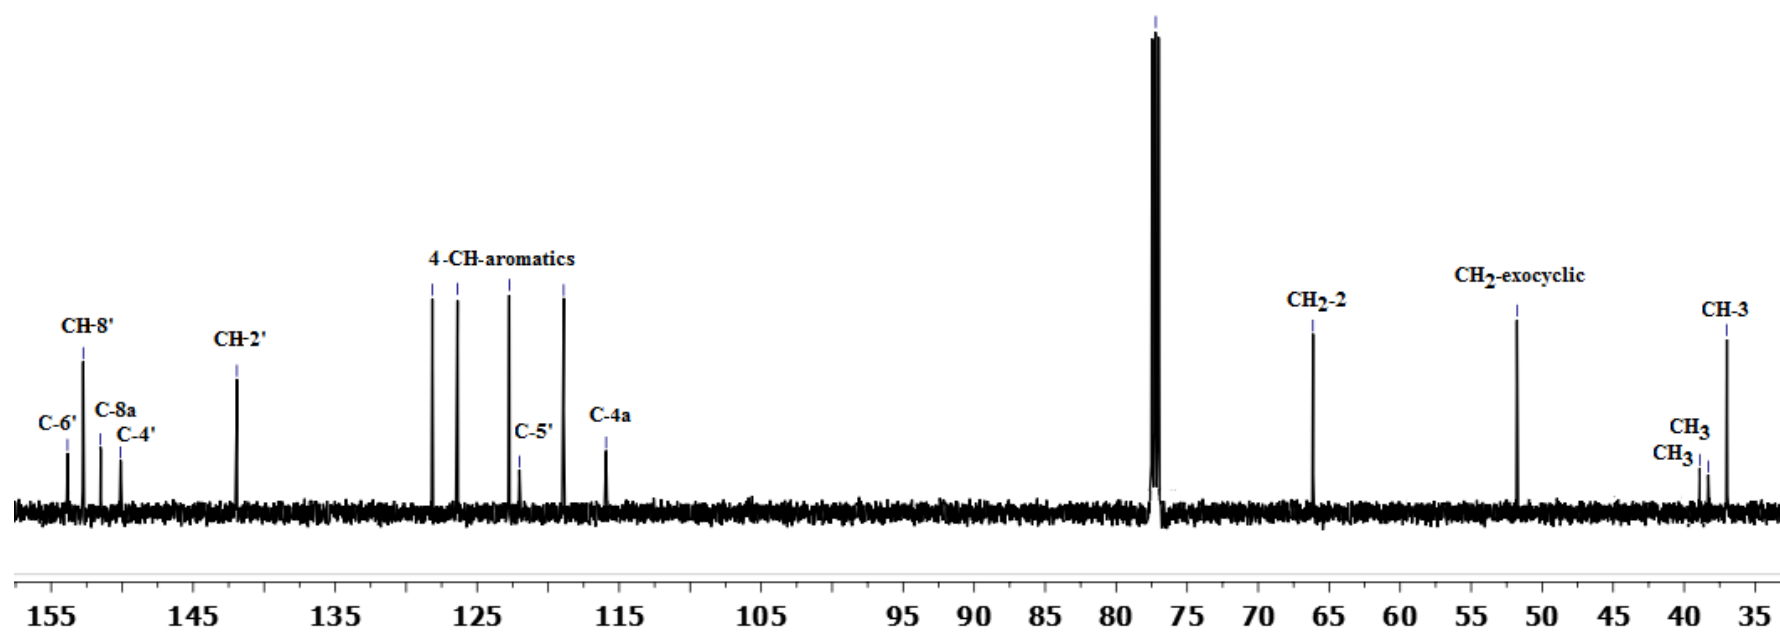

500 MHz, CDCl<sub>3</sub>

— 152.74

— 141.92

— 128.15

— 126.38

— 122.74

— 118.91

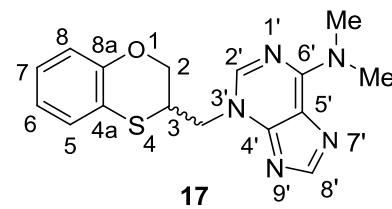

— 66.14

— 51.77

— 36.99

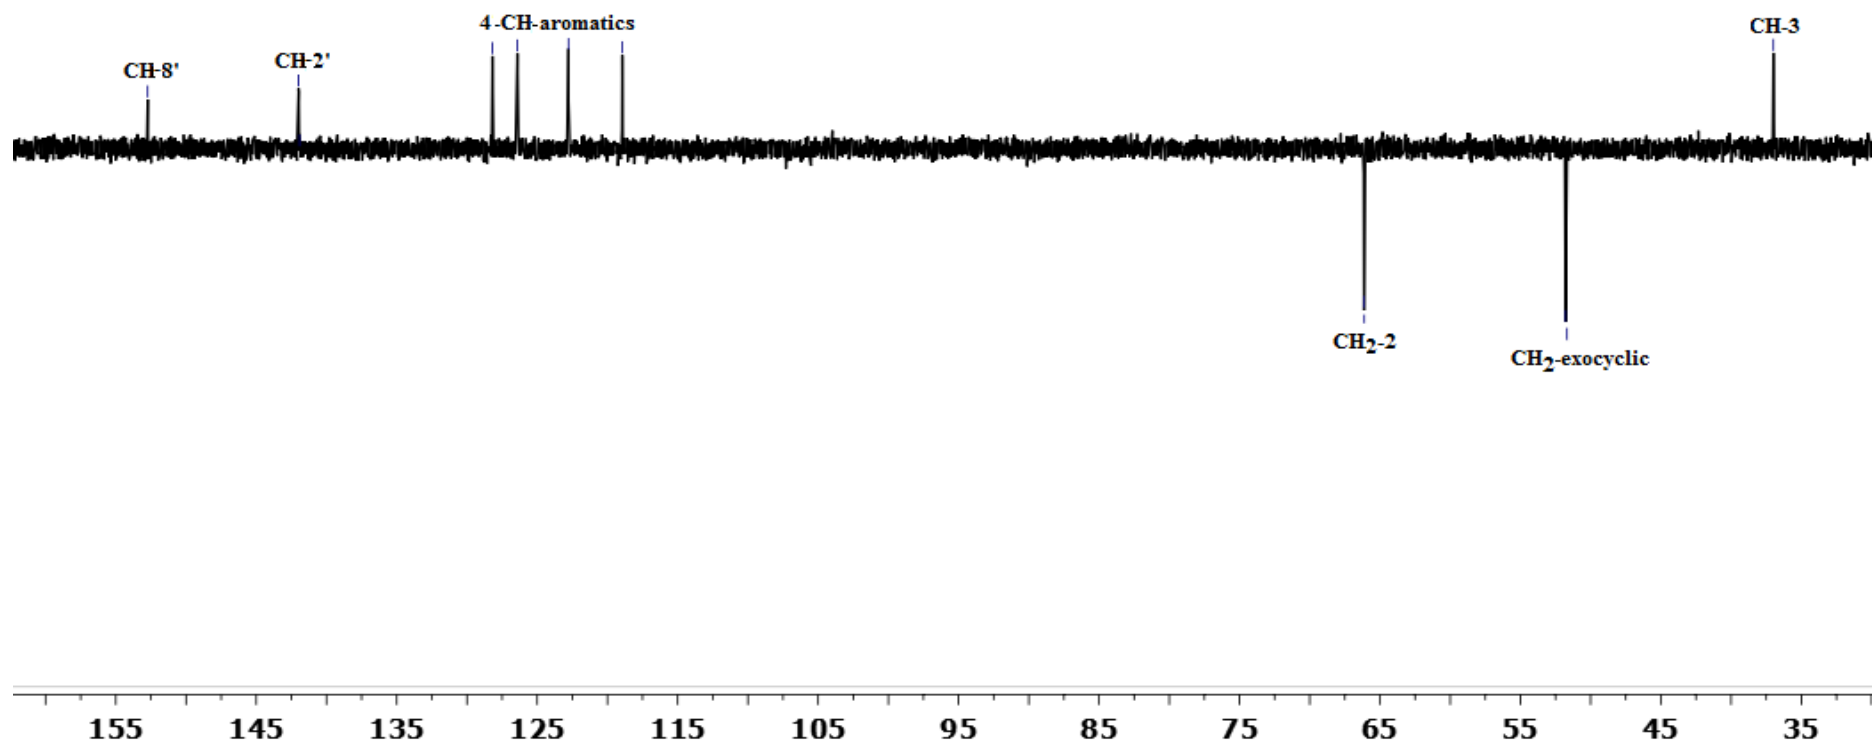

500 MHz, CDCl<sub>3</sub>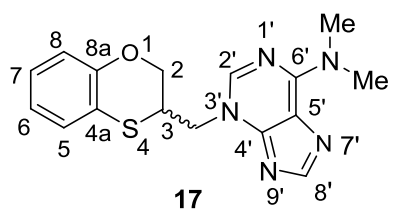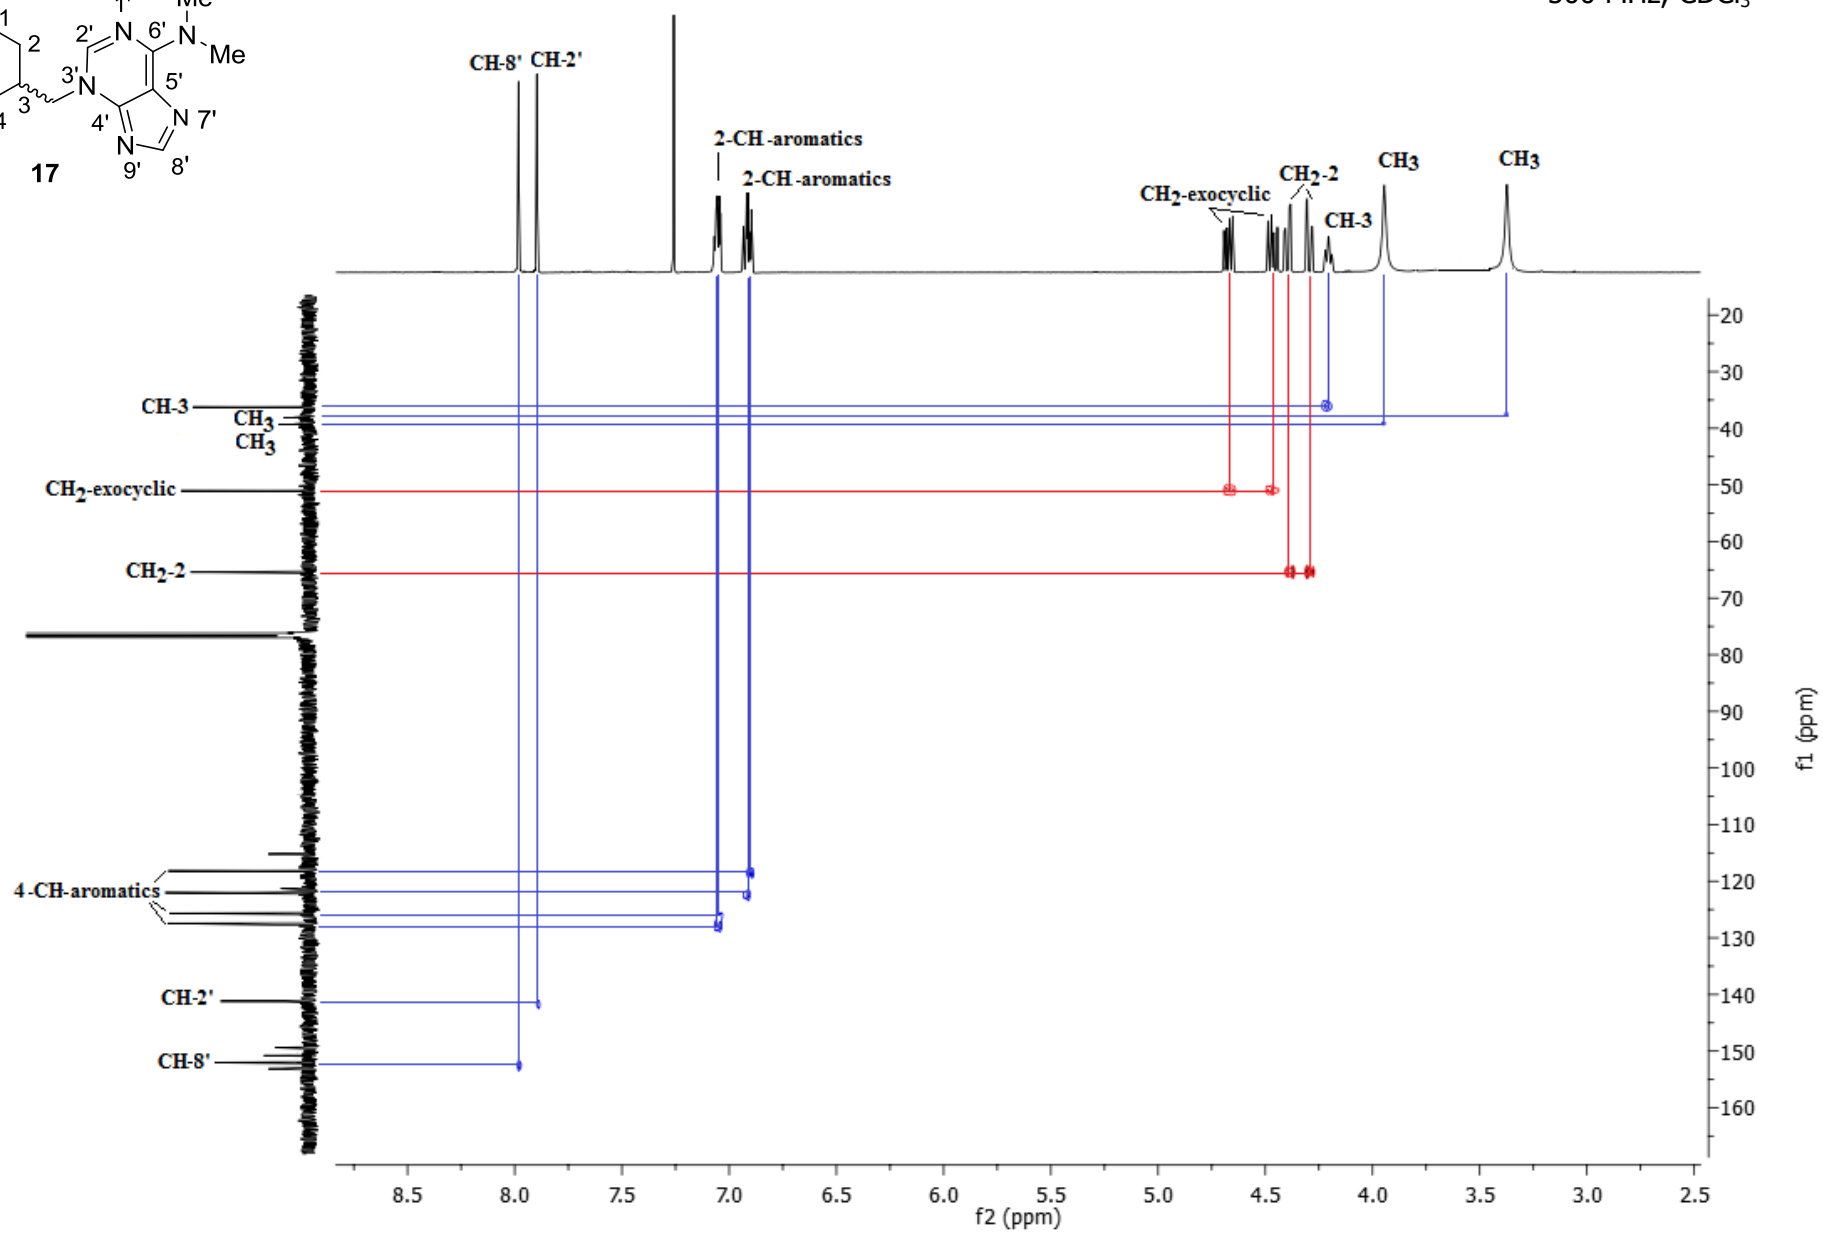

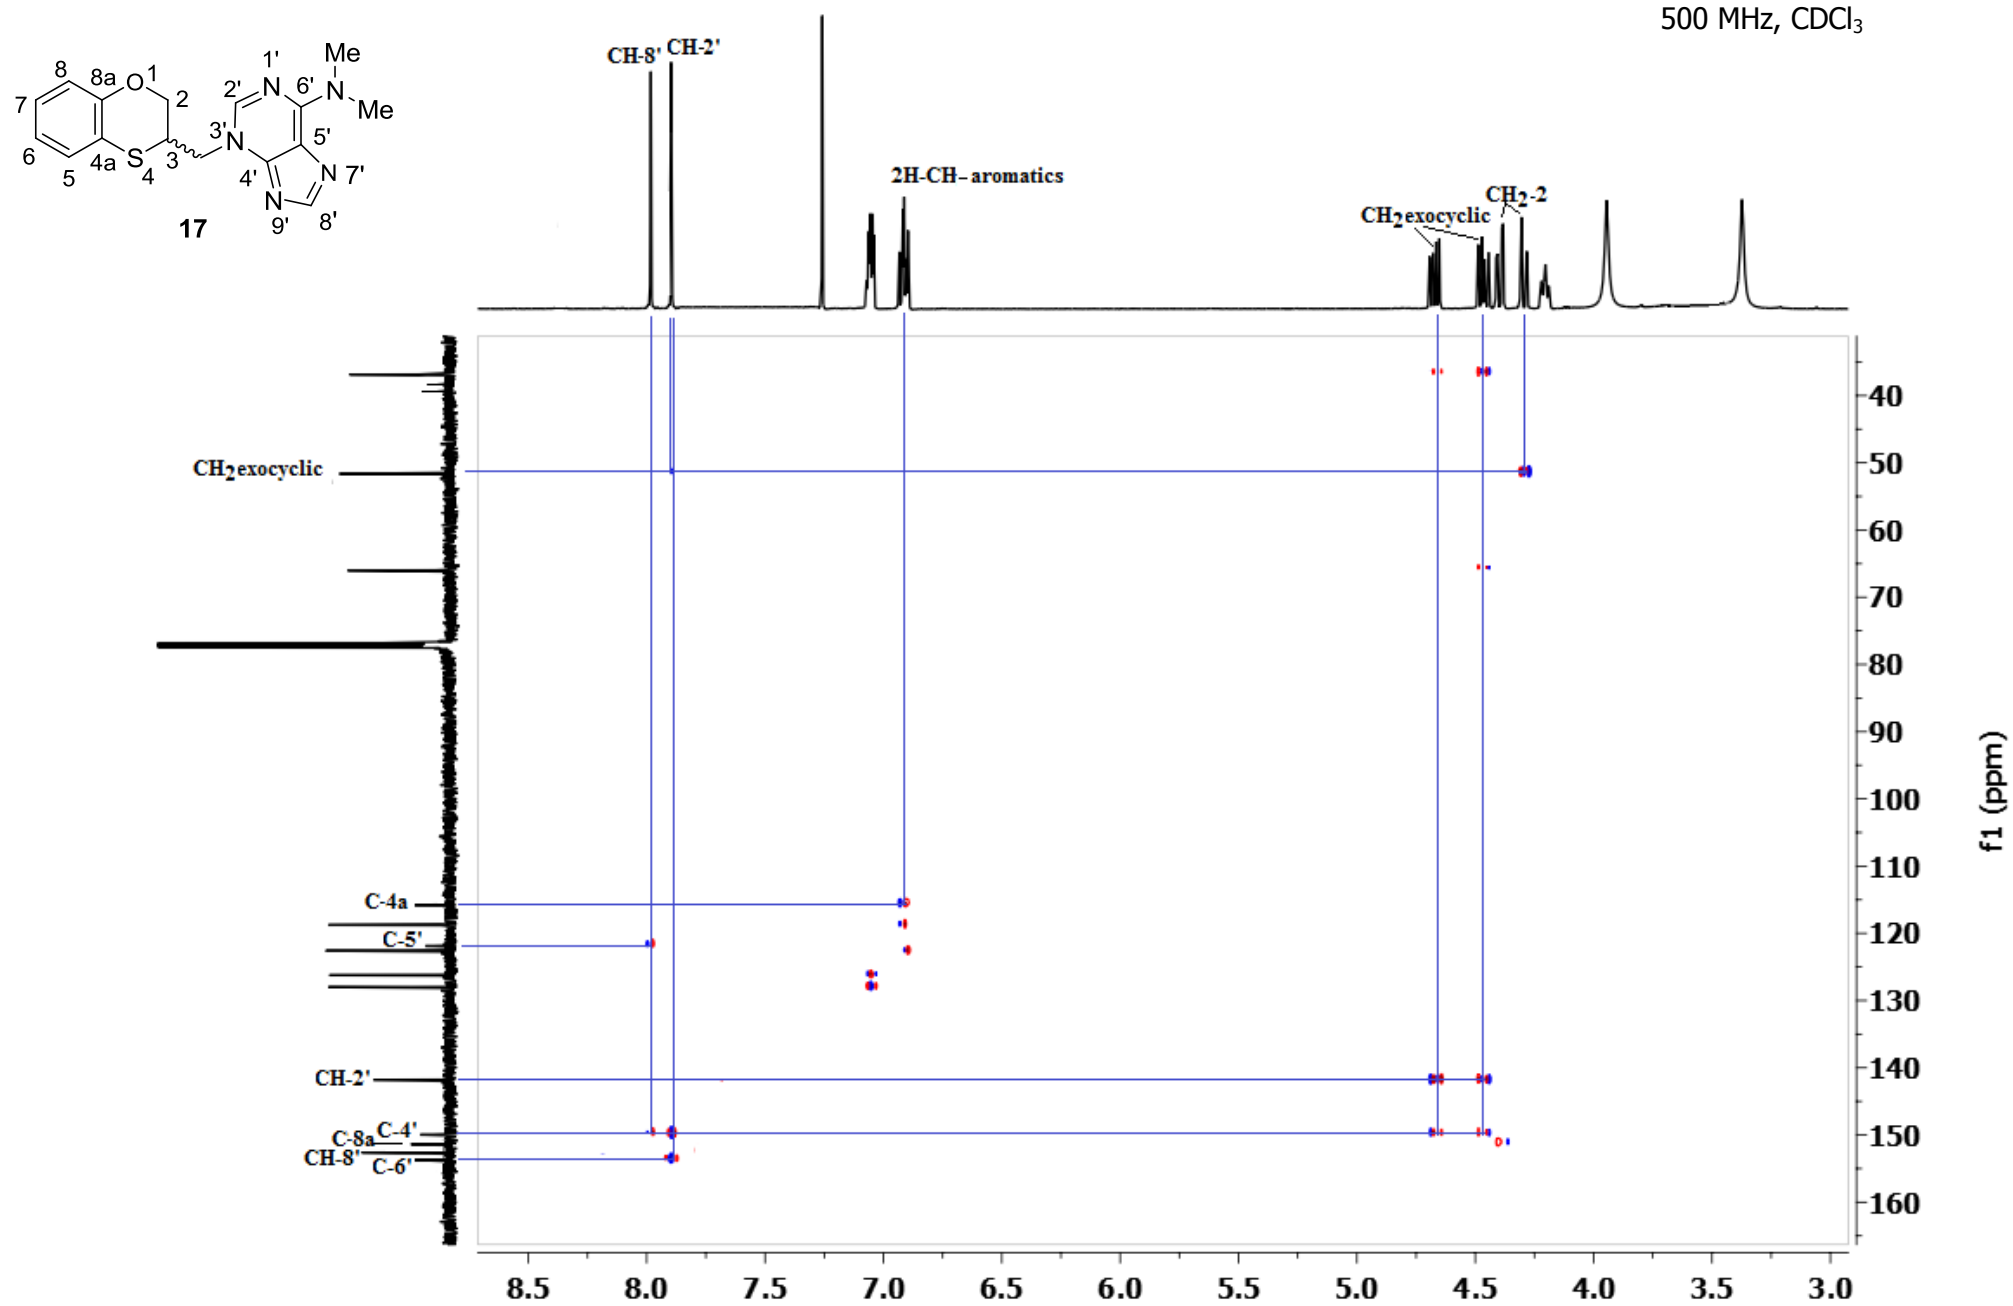

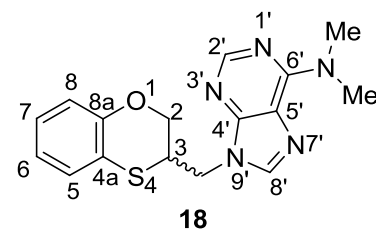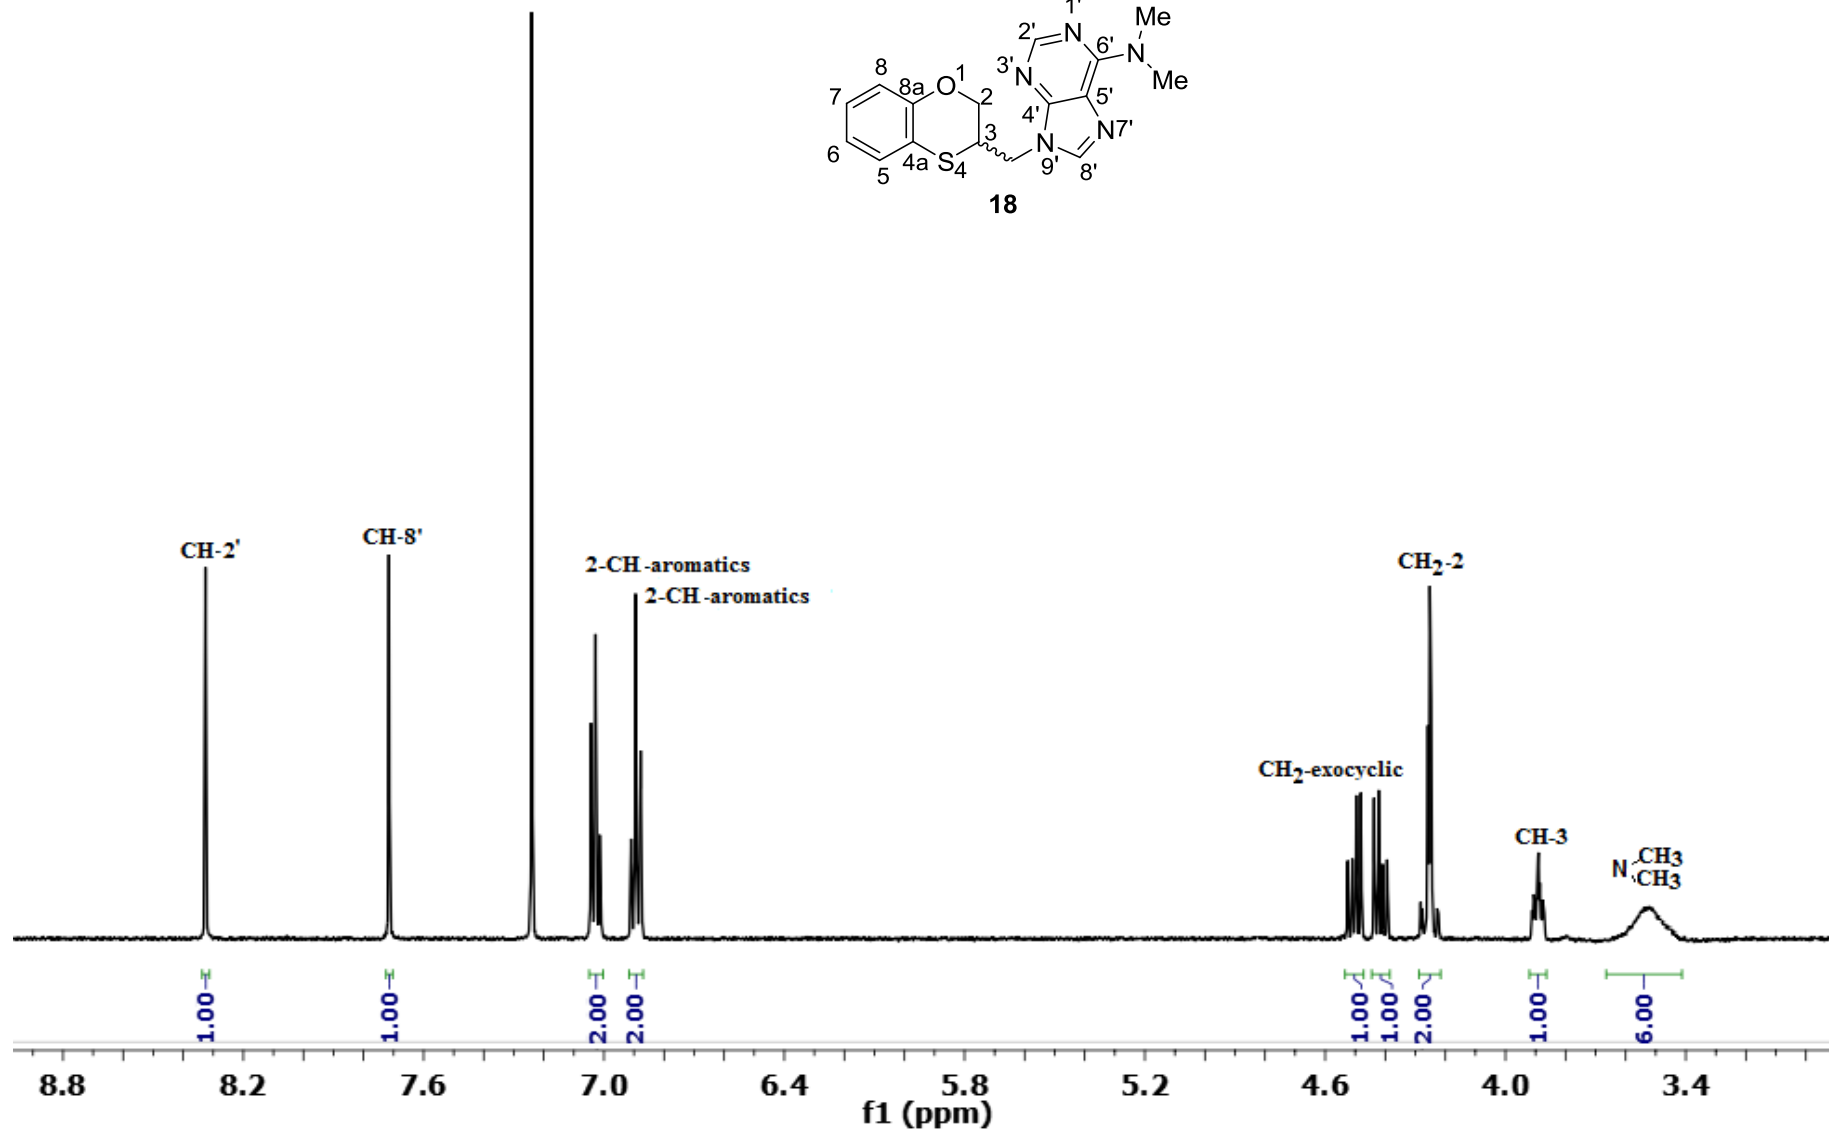



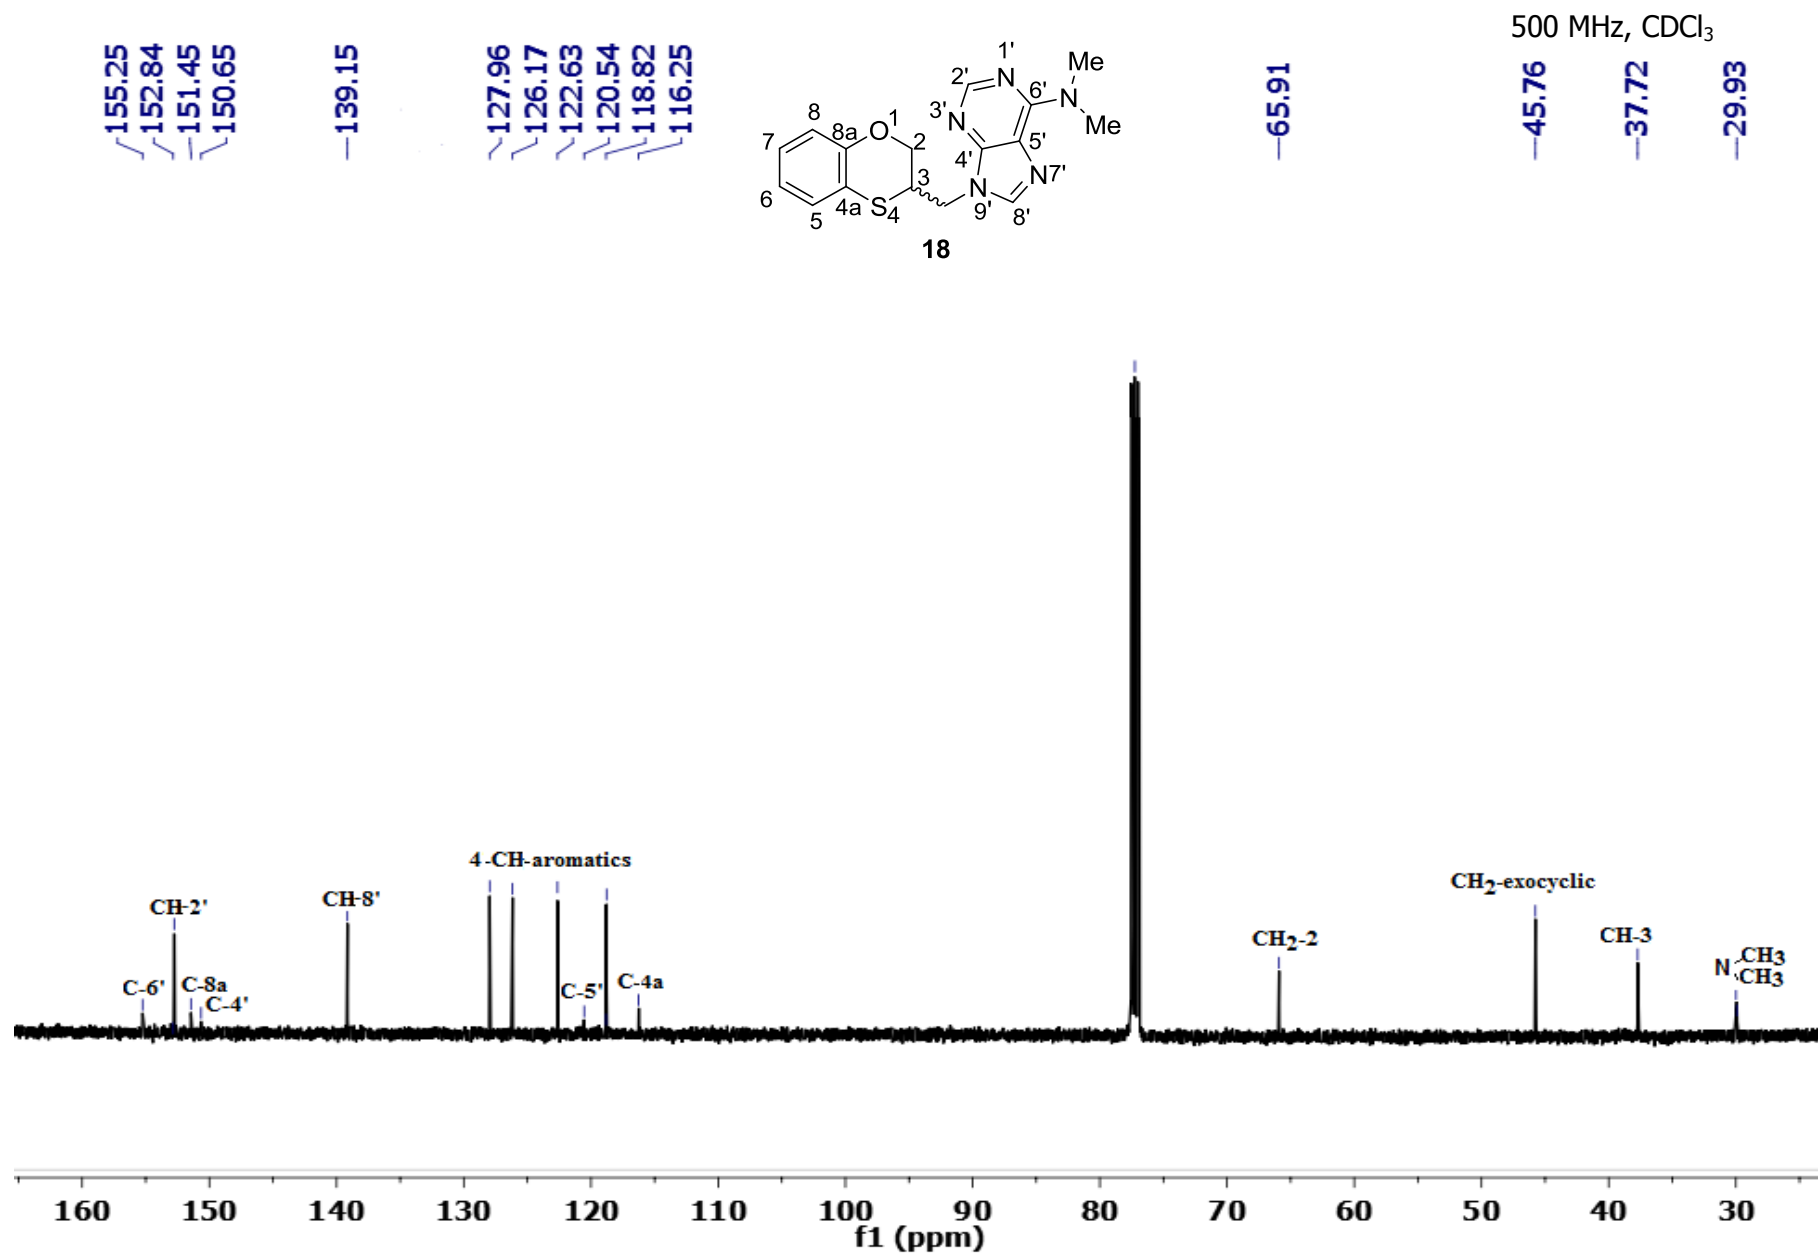

500 MHz, CDCl<sub>3</sub>

—152.84

—139.15

~127.96

~126.17

~122.63

~118.82

—65.91

—45.76

—37.72

—29.93

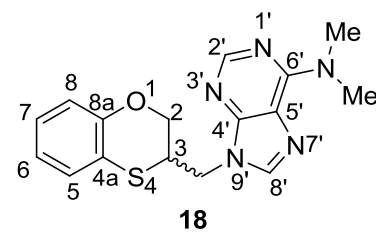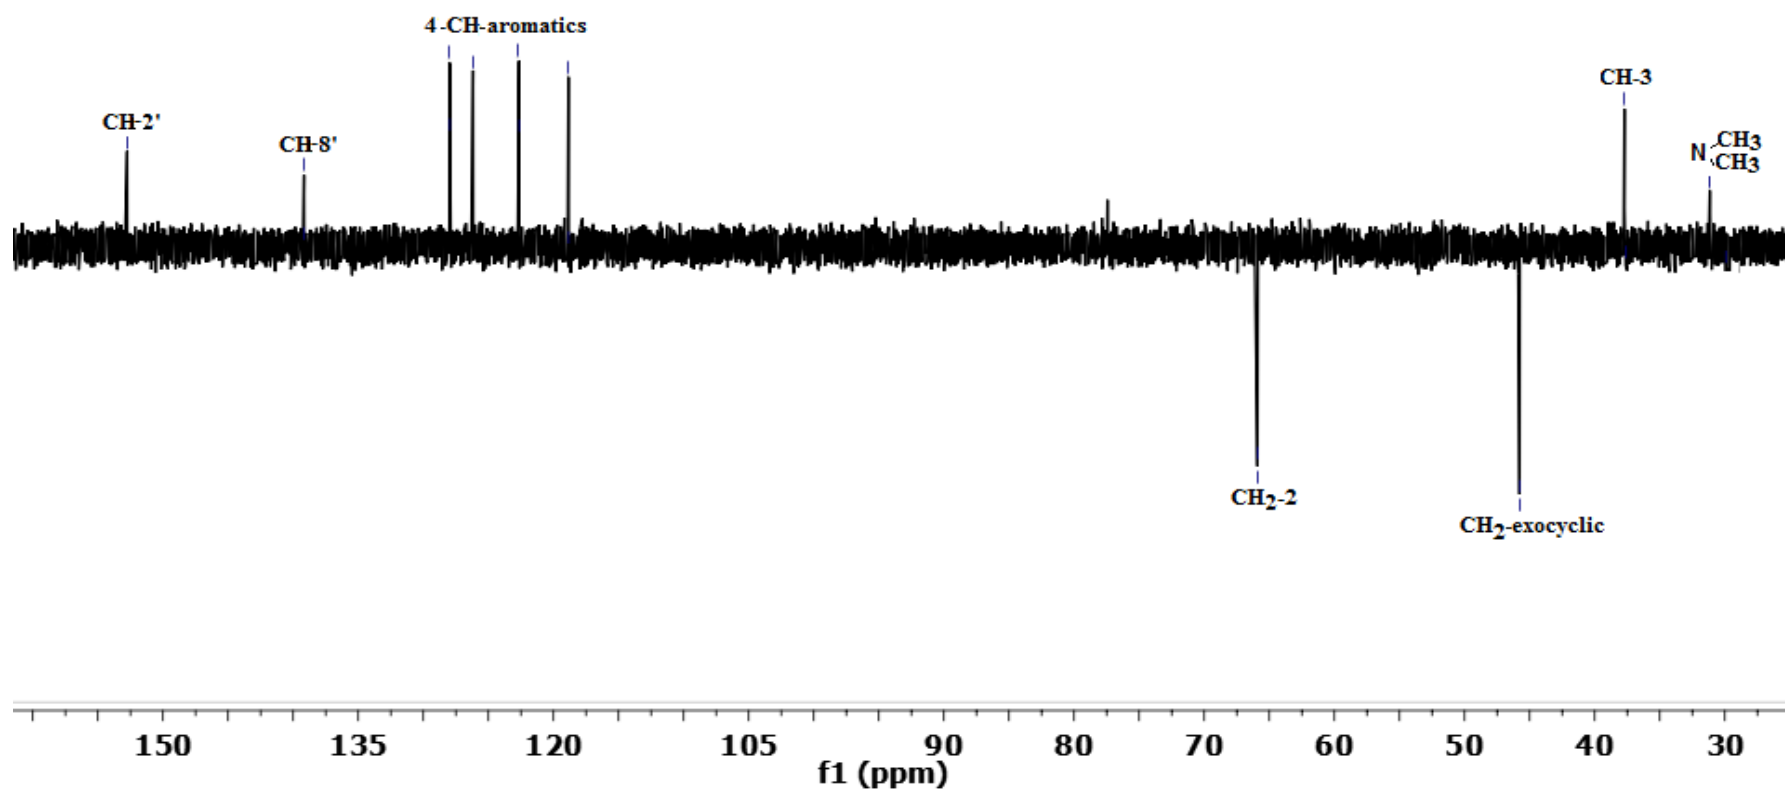

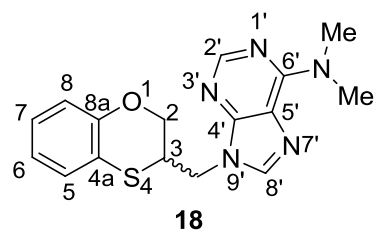500 MHz, CDCl<sub>3</sub>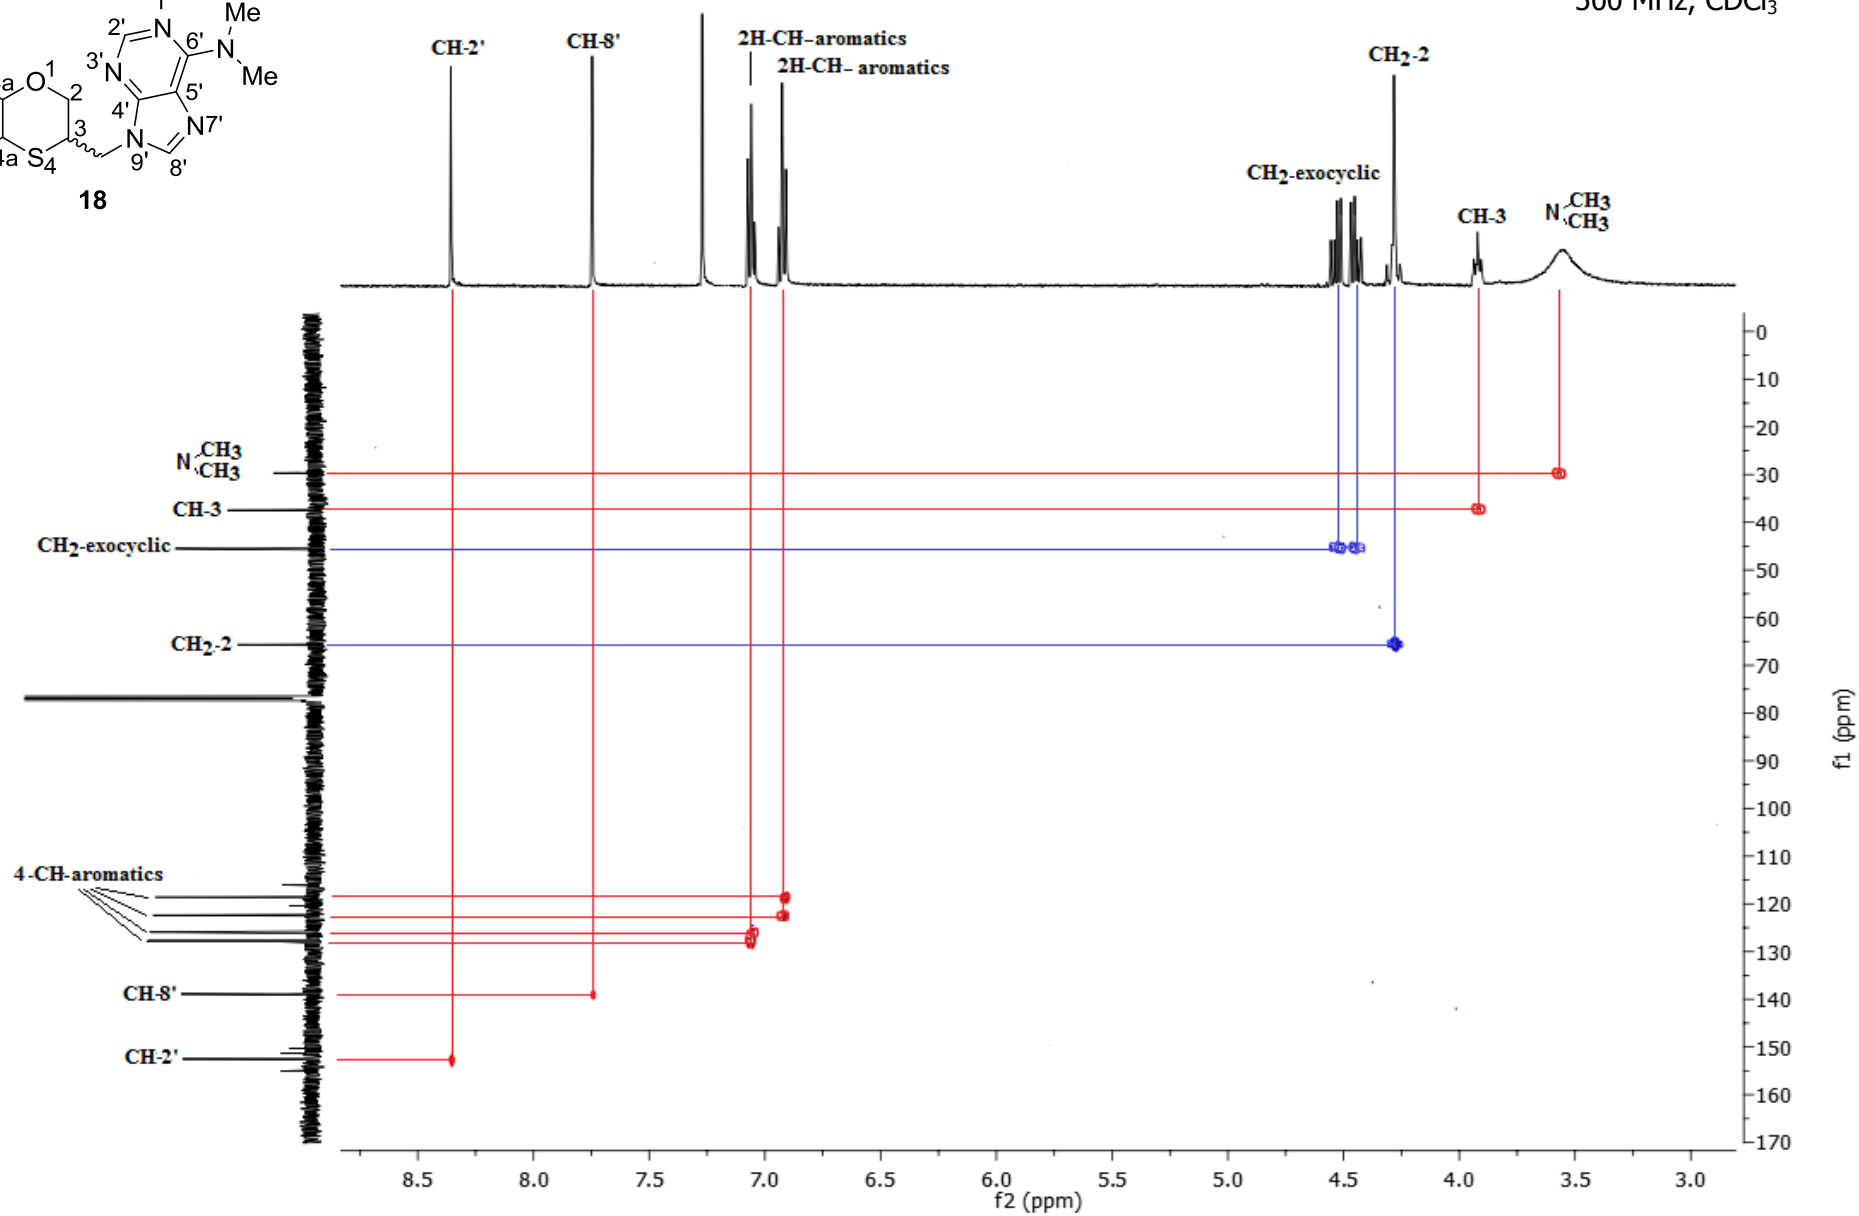

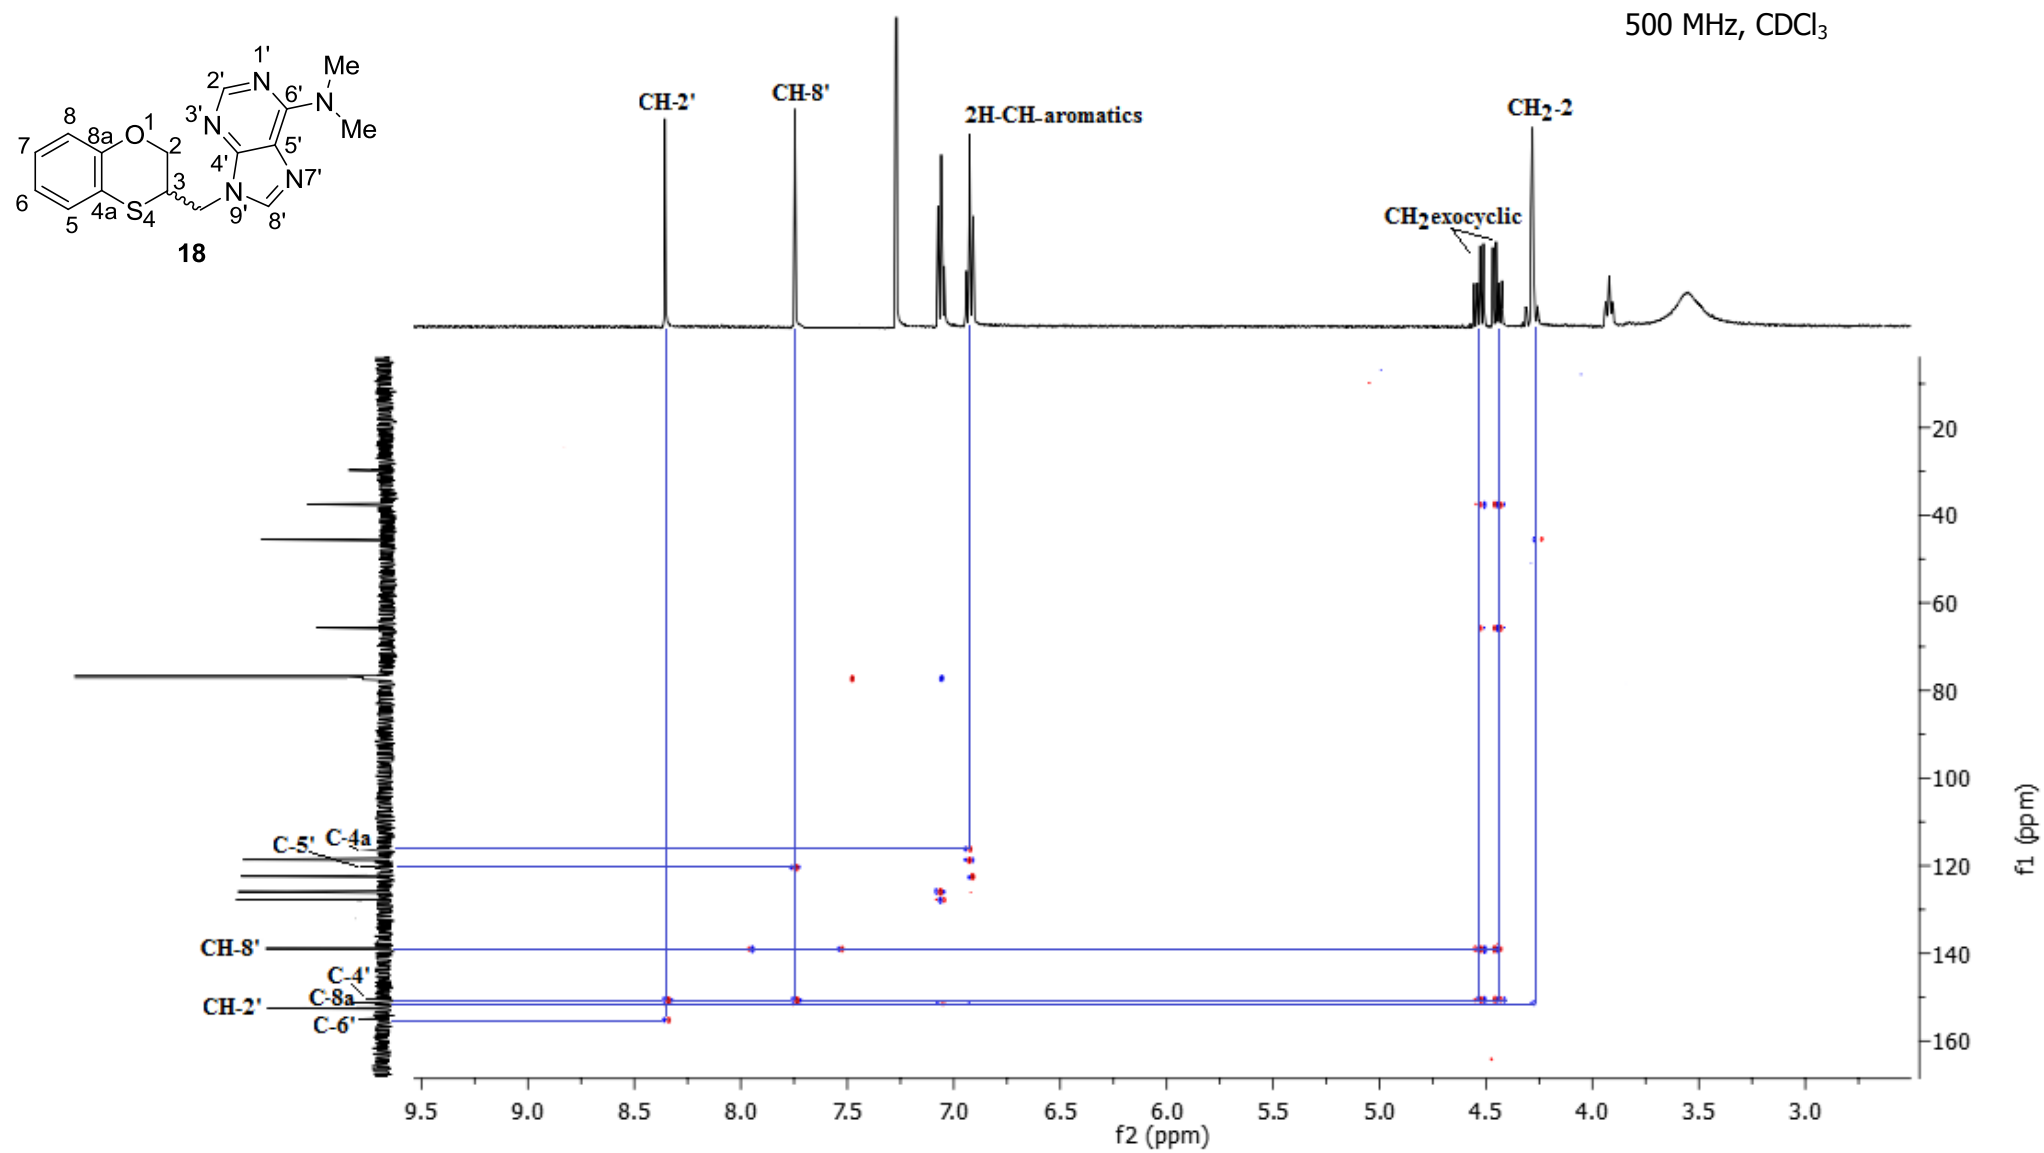

500 MHz, CDCl<sub>3</sub>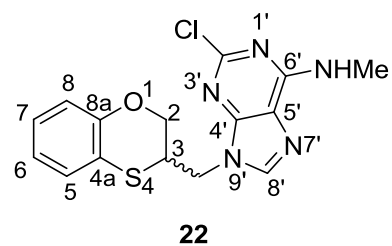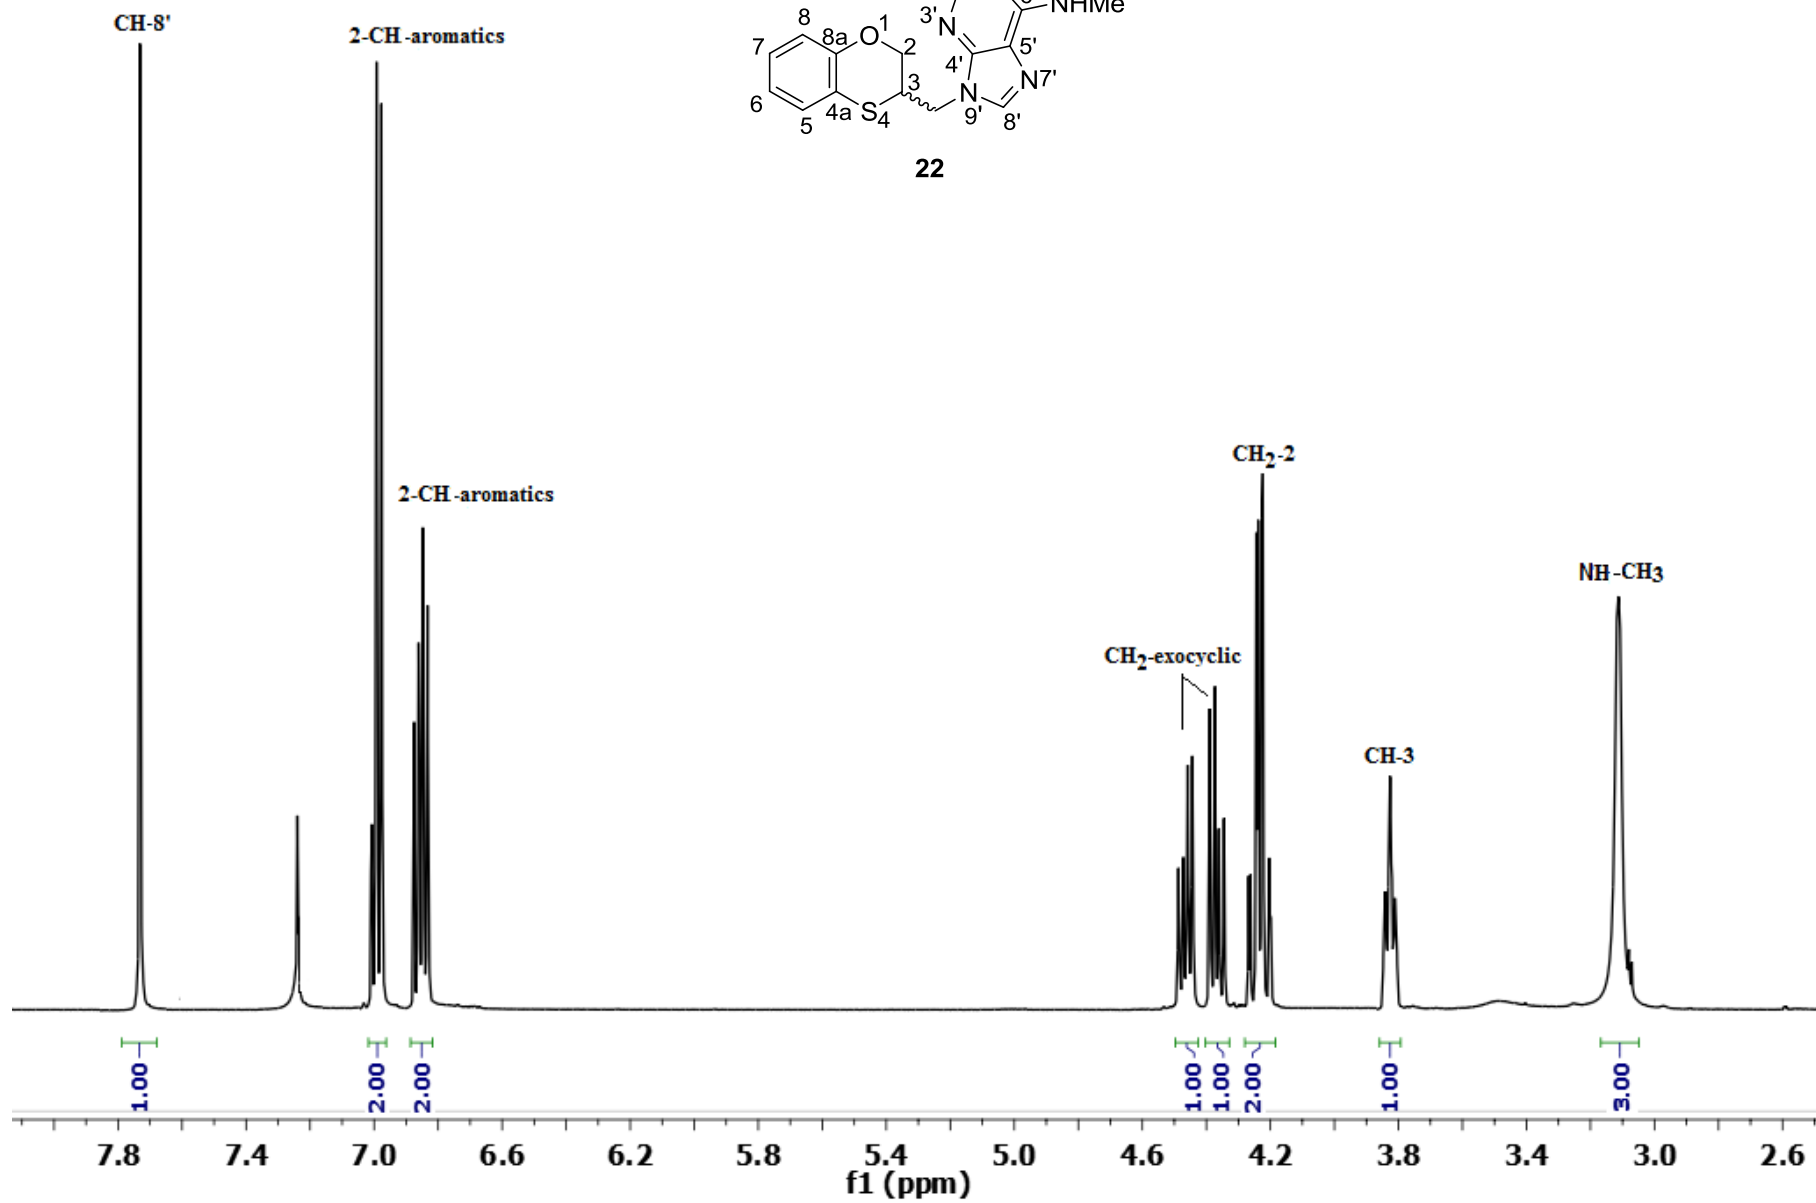

500 MHz, CDCl<sub>3</sub>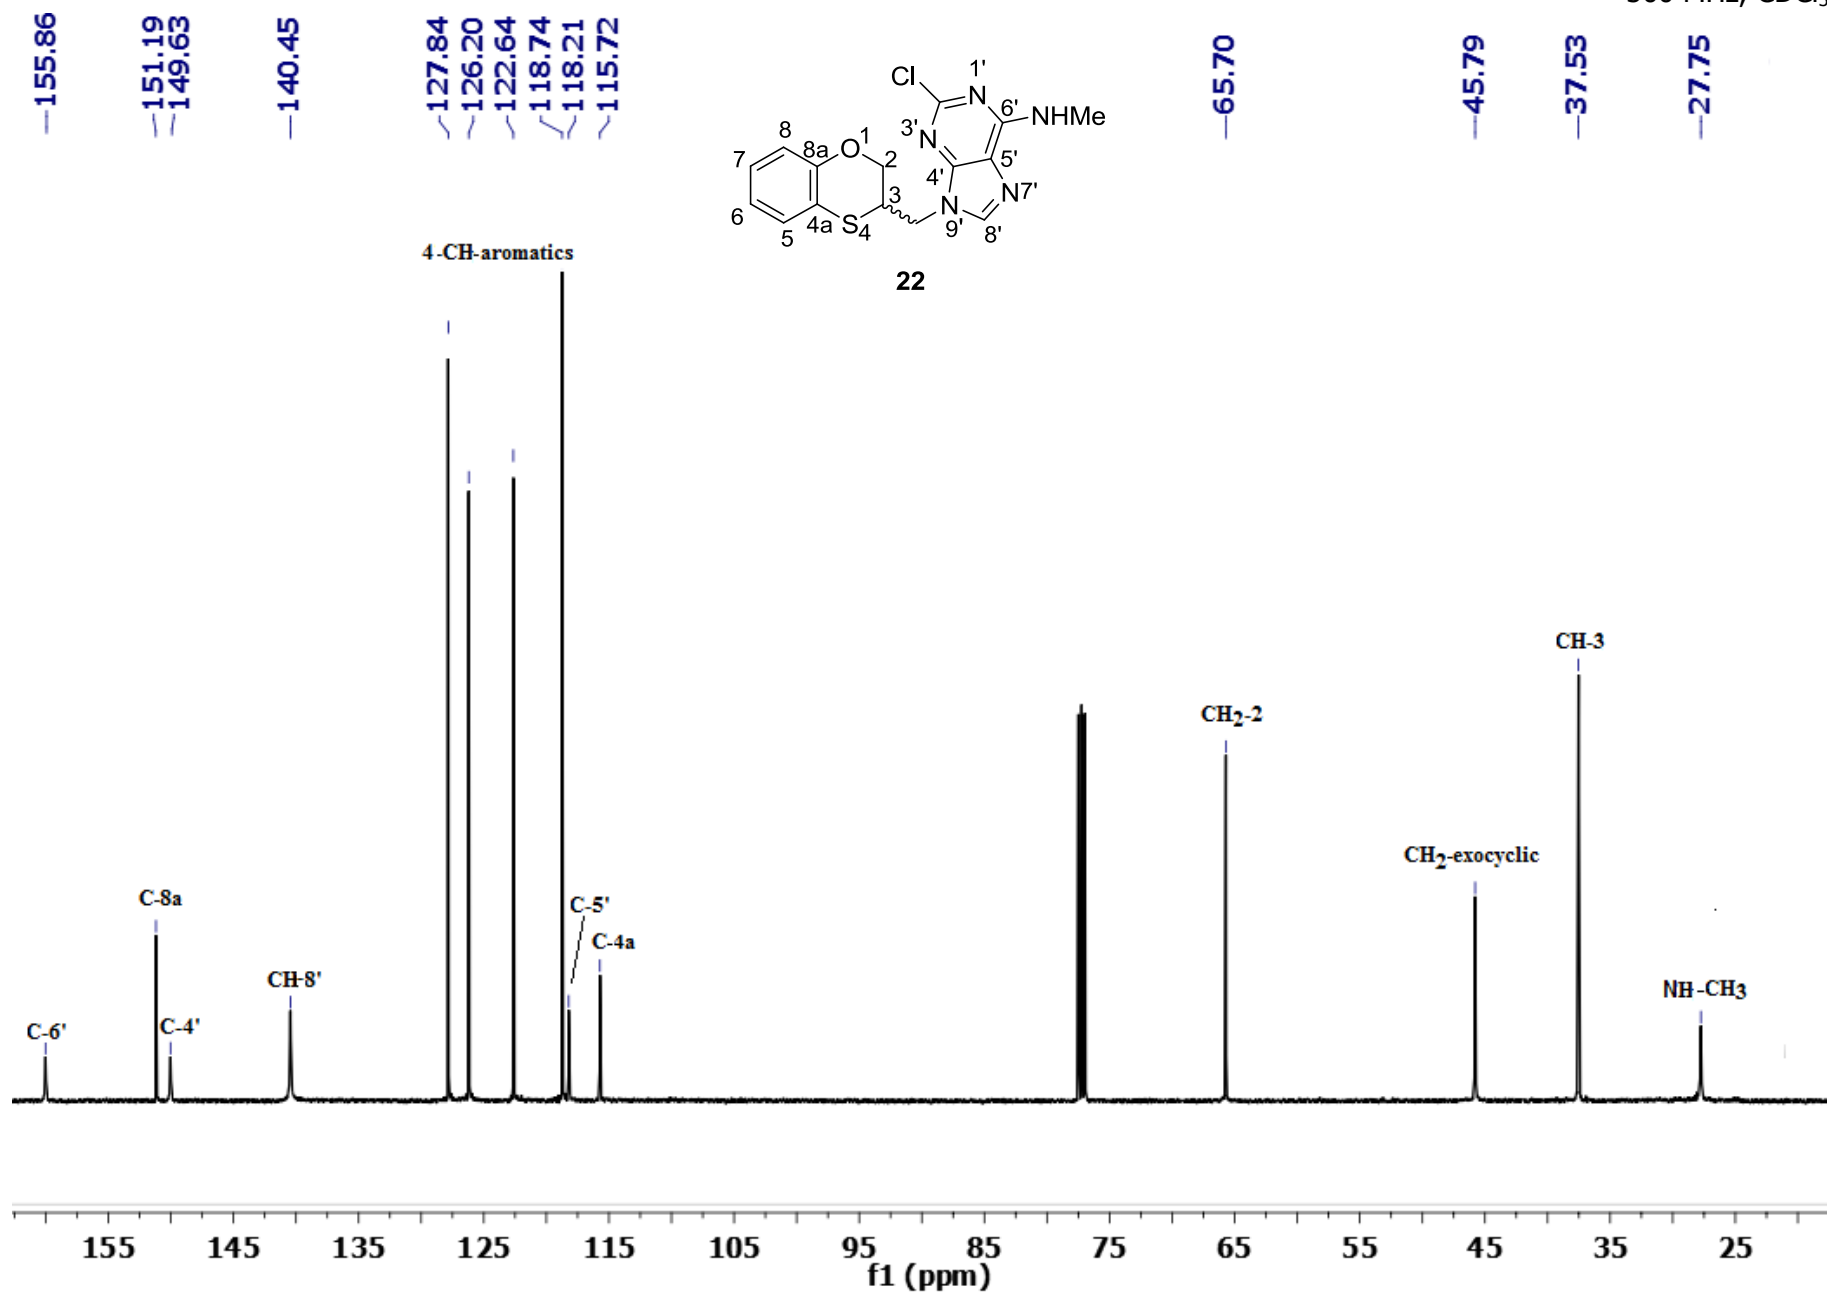

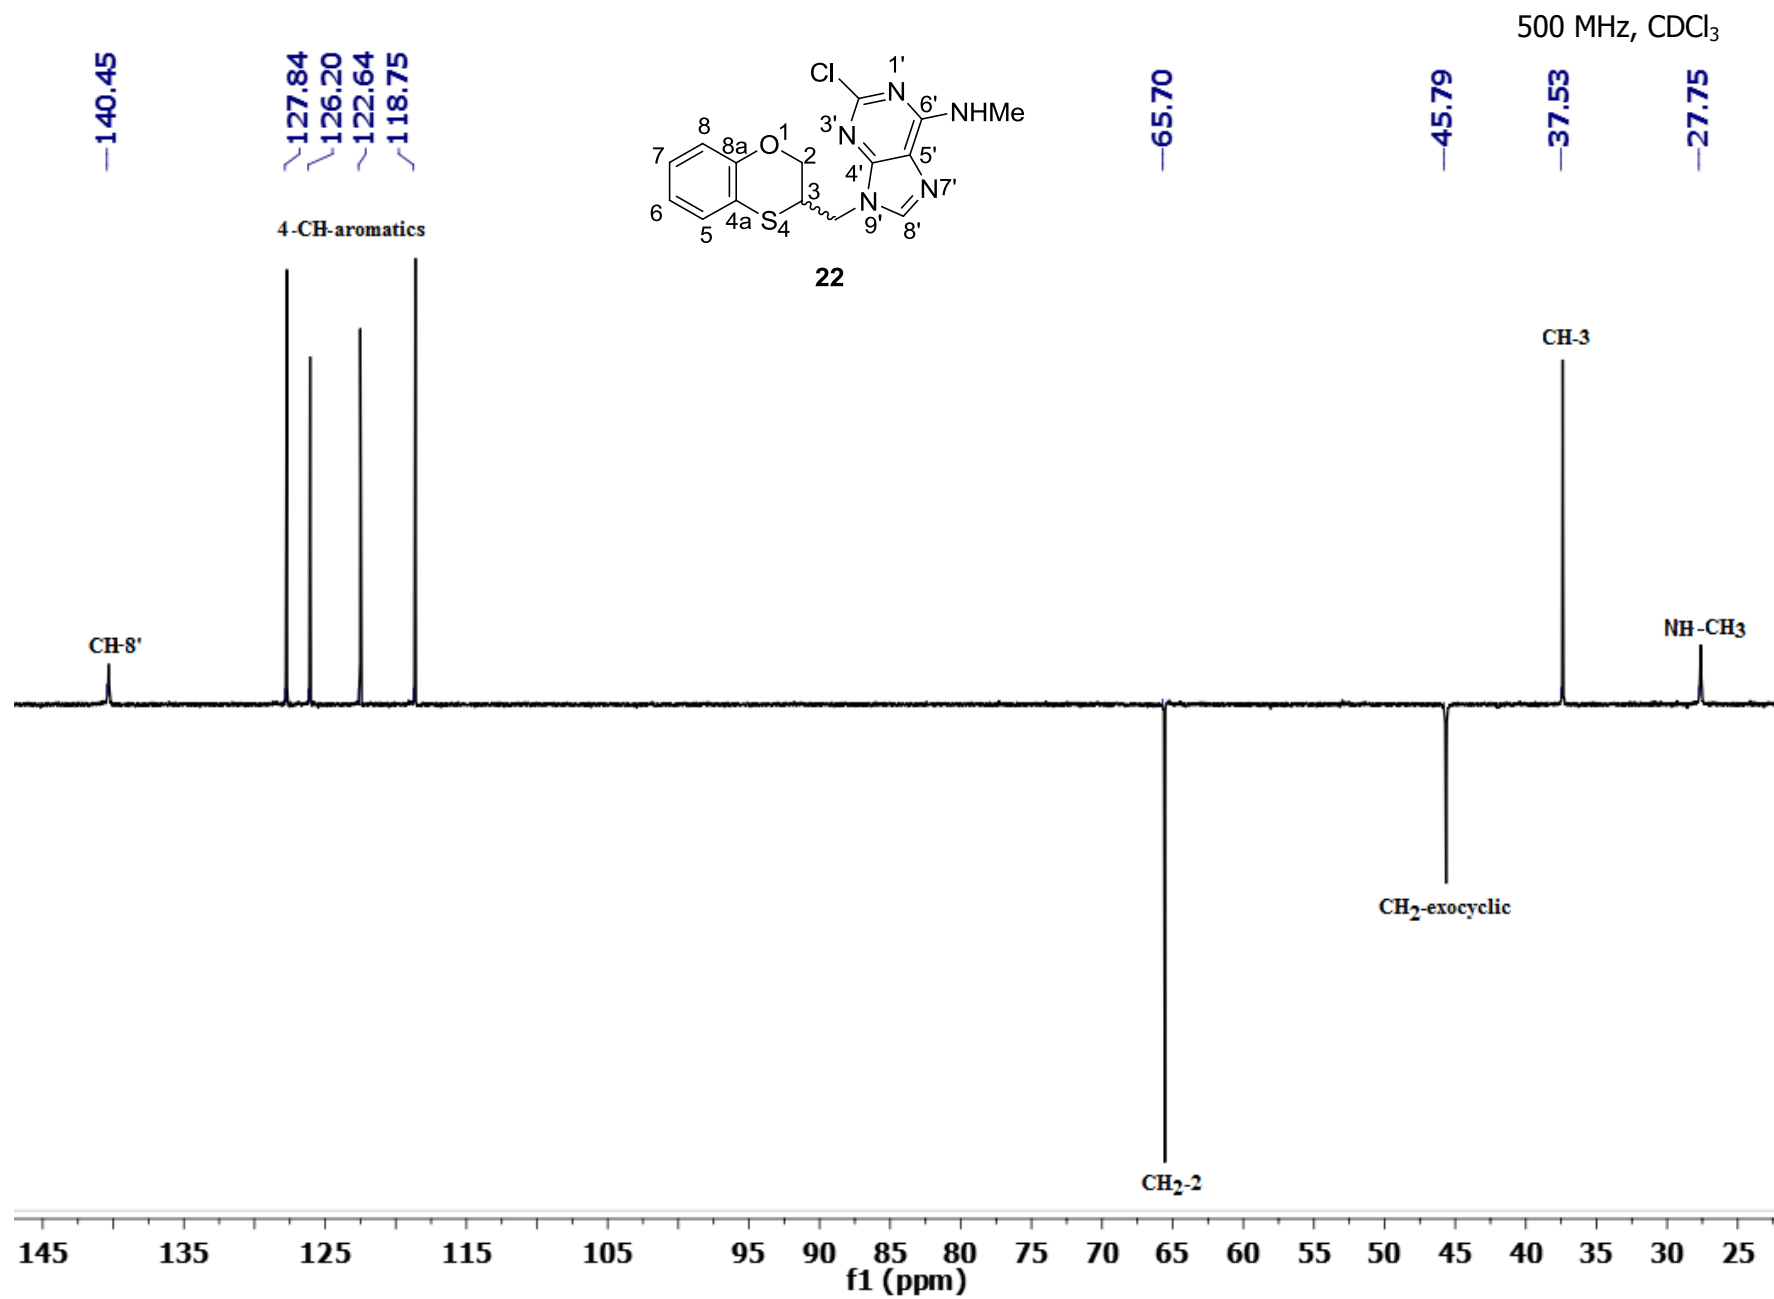

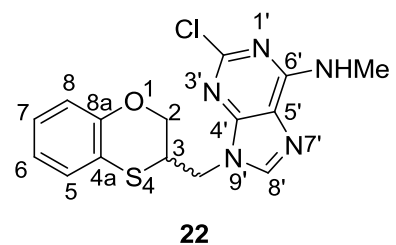500 MHz, CDCl<sub>3</sub>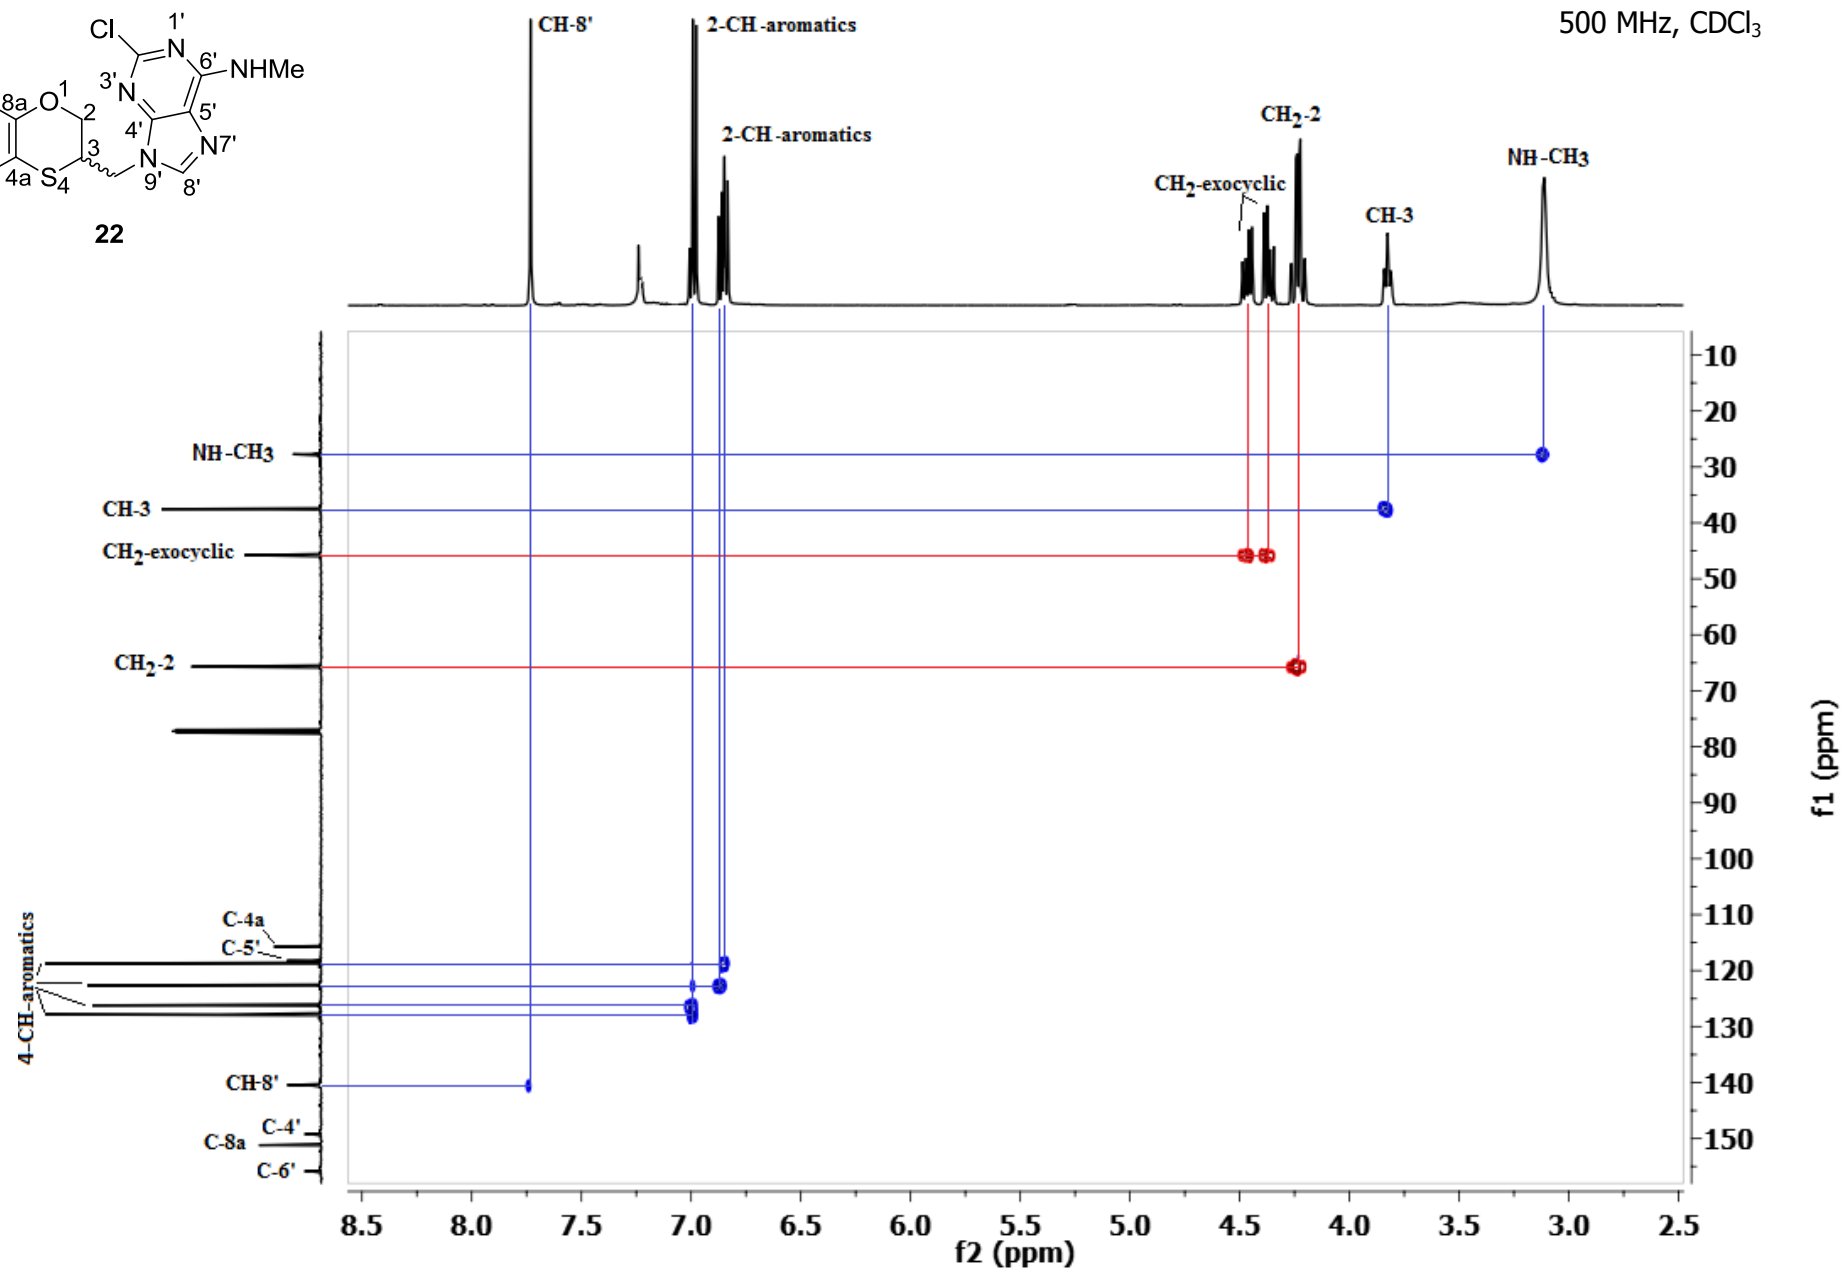



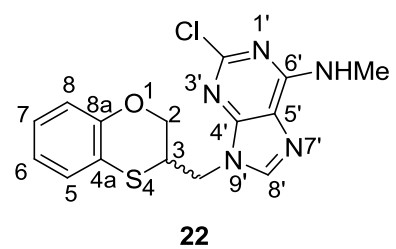500 MHz, CDCl<sub>3</sub>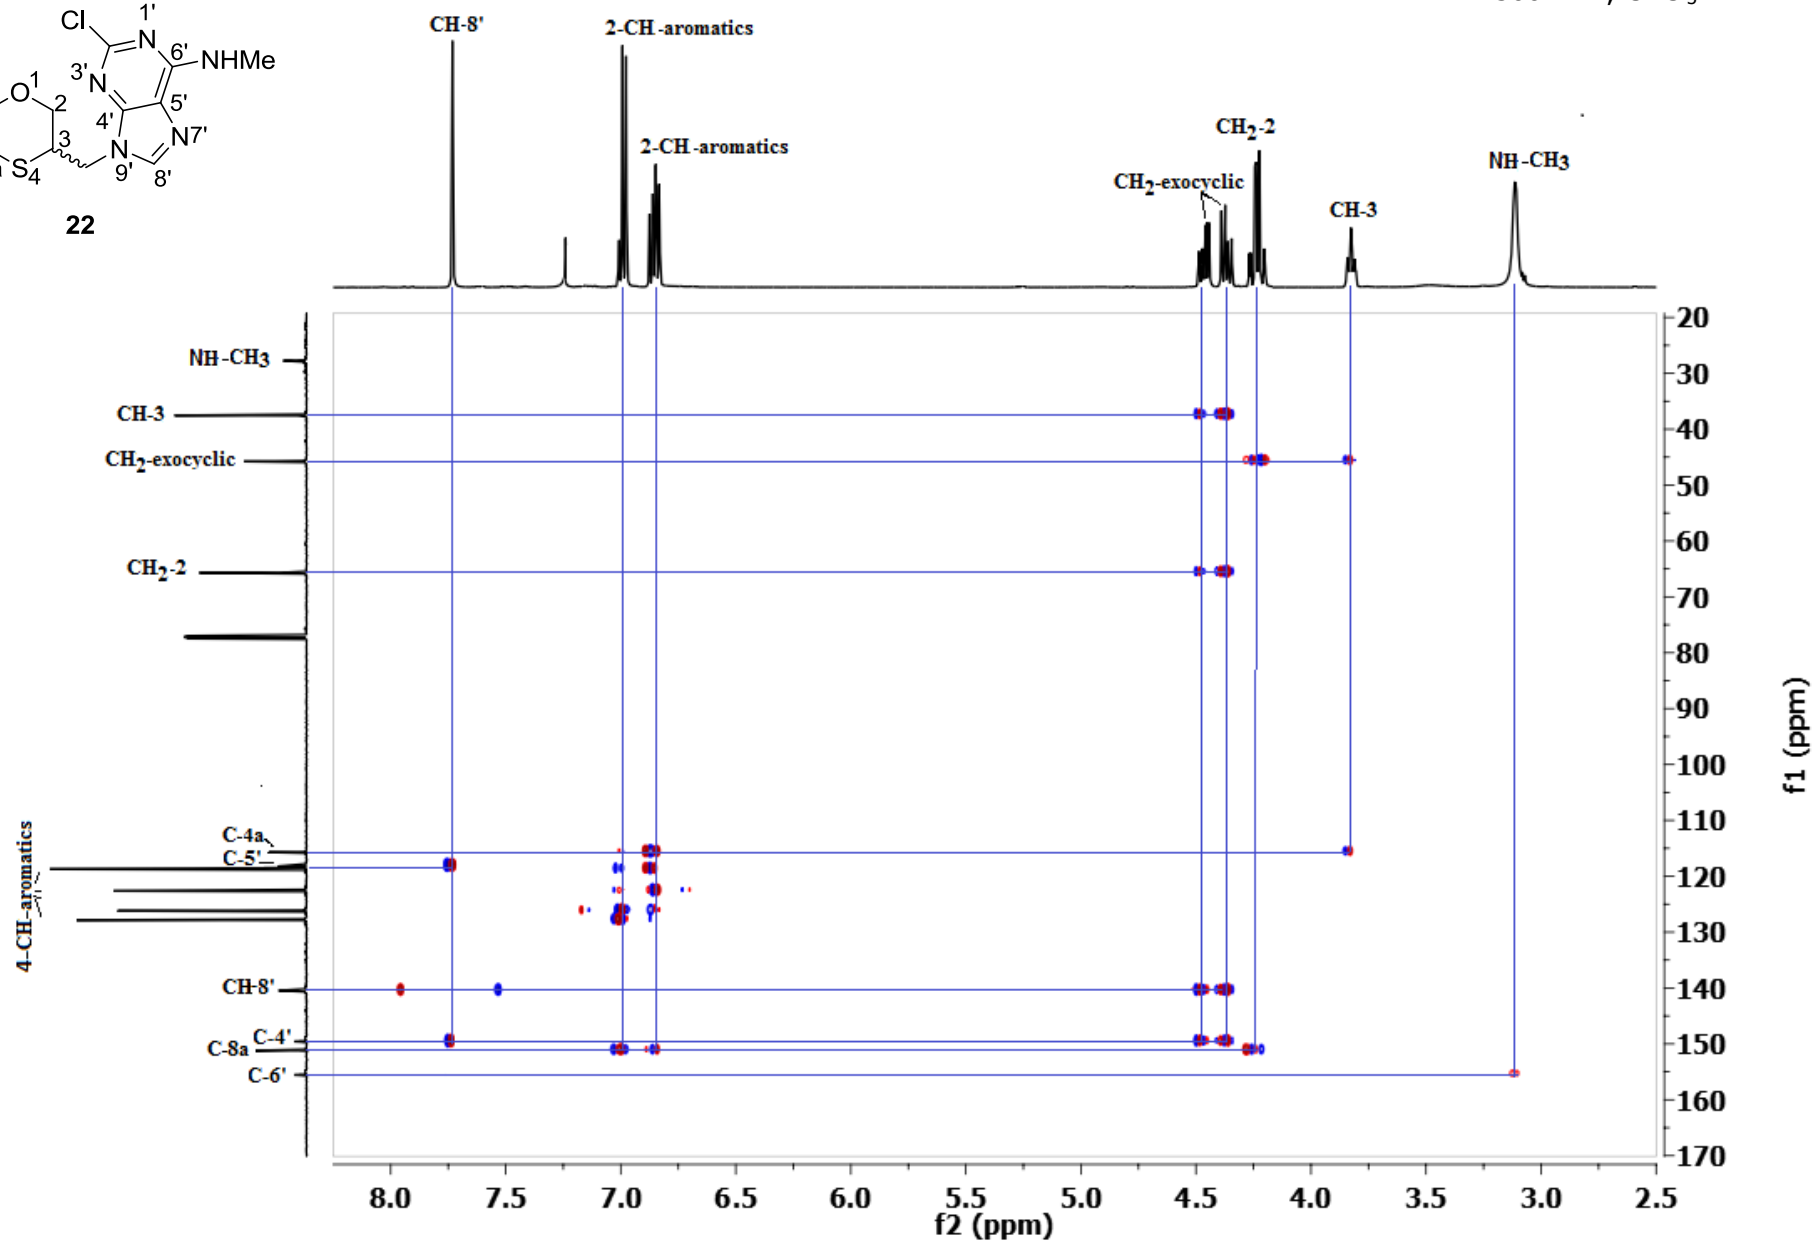

500 MHz, CDCl<sub>3</sub>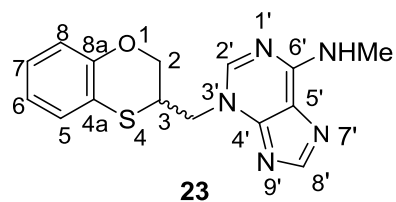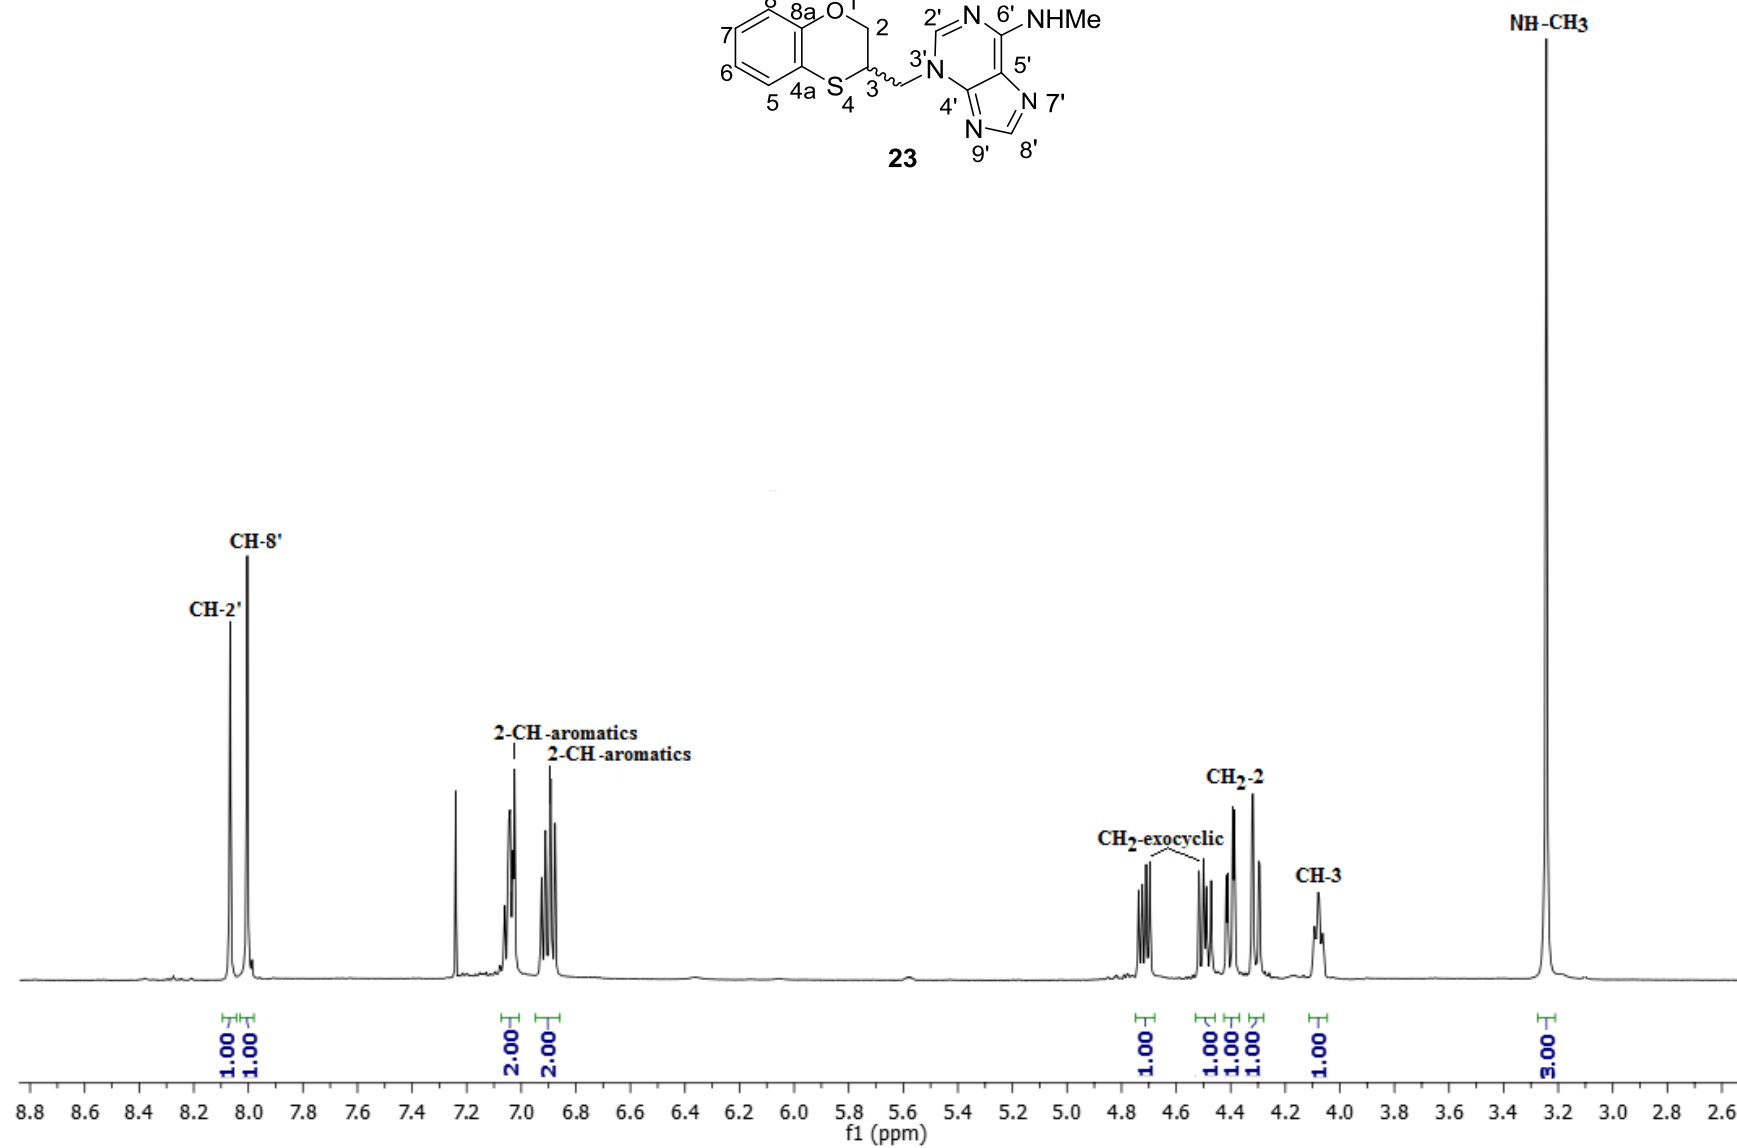

500 MHz, CDCl<sub>3</sub>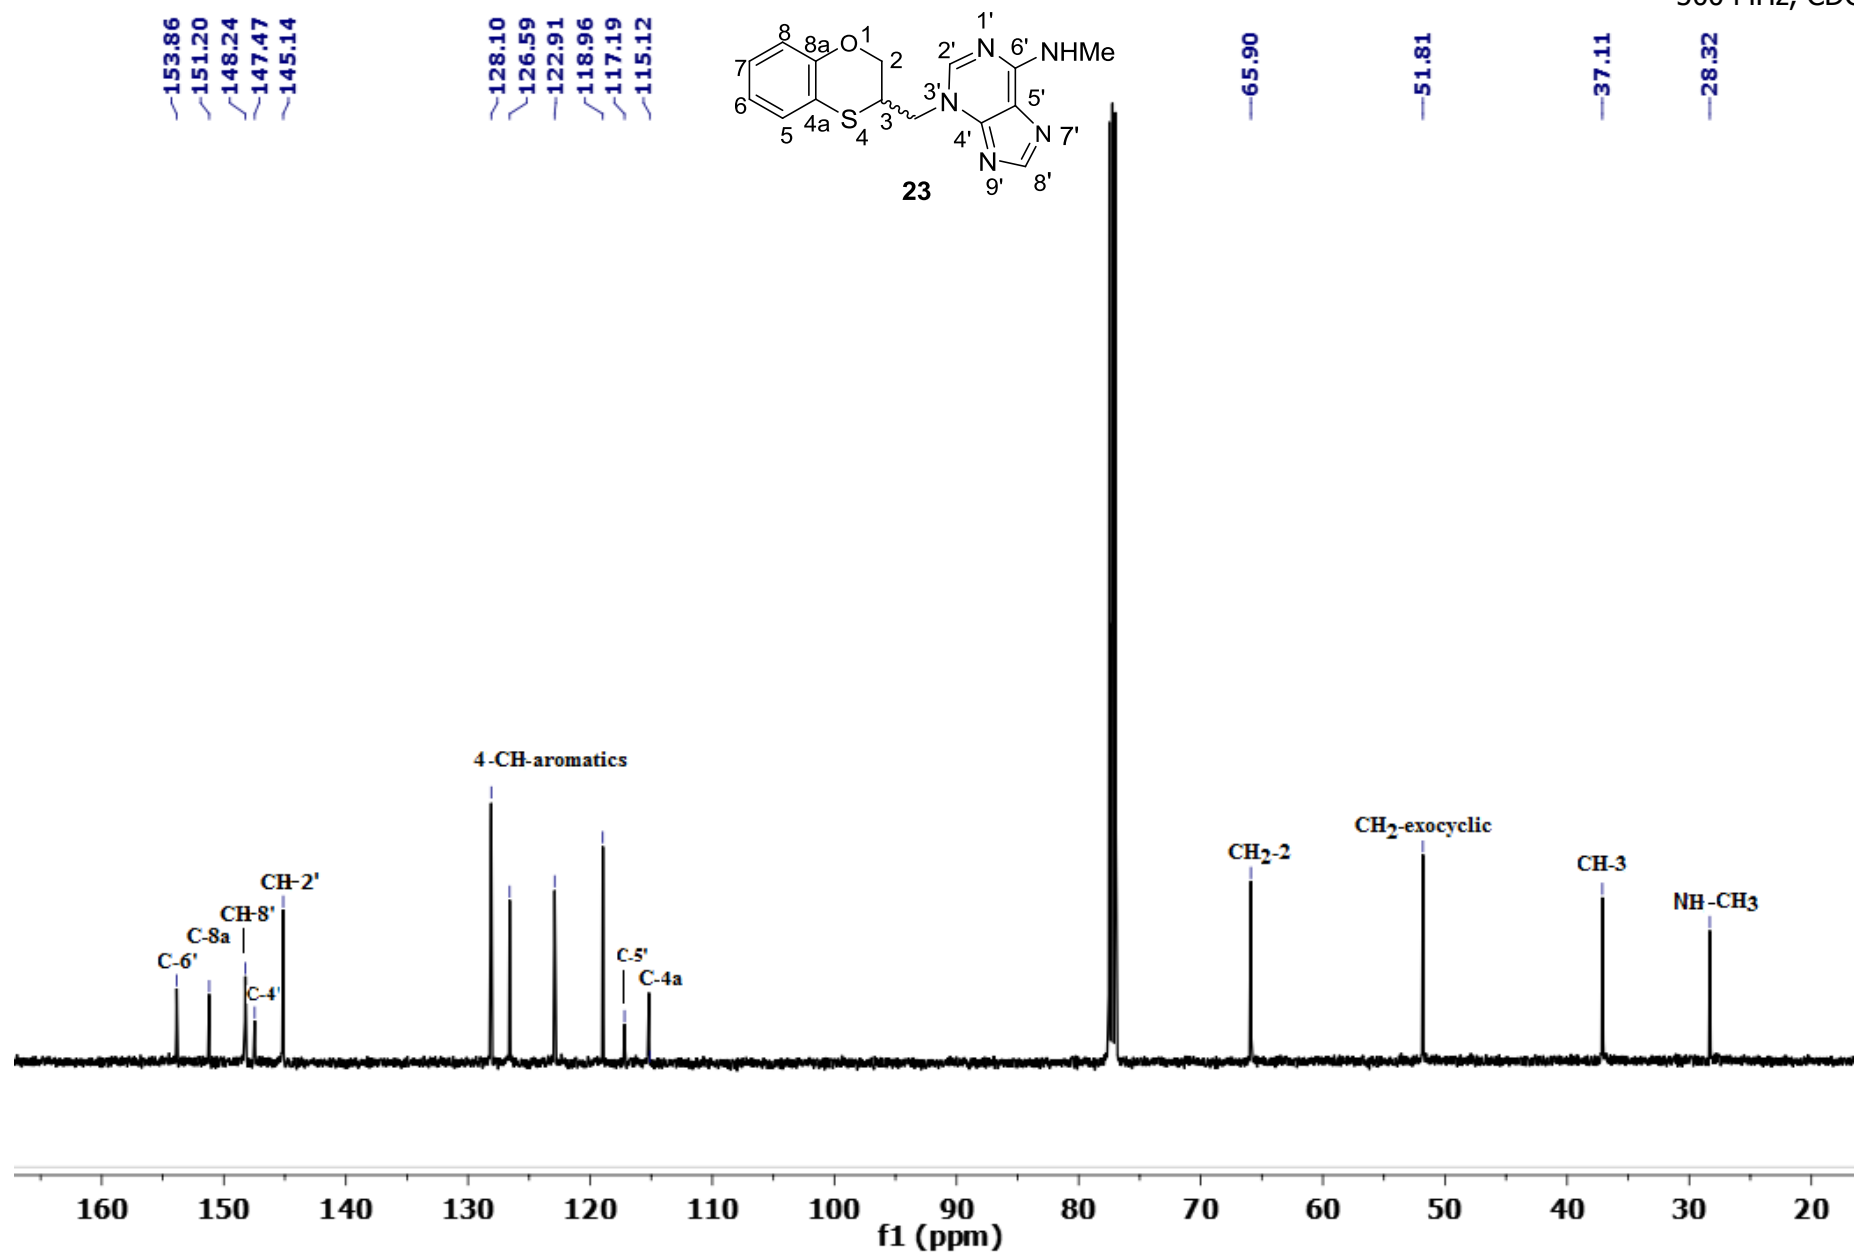

500 MHz, CDCl<sub>3</sub>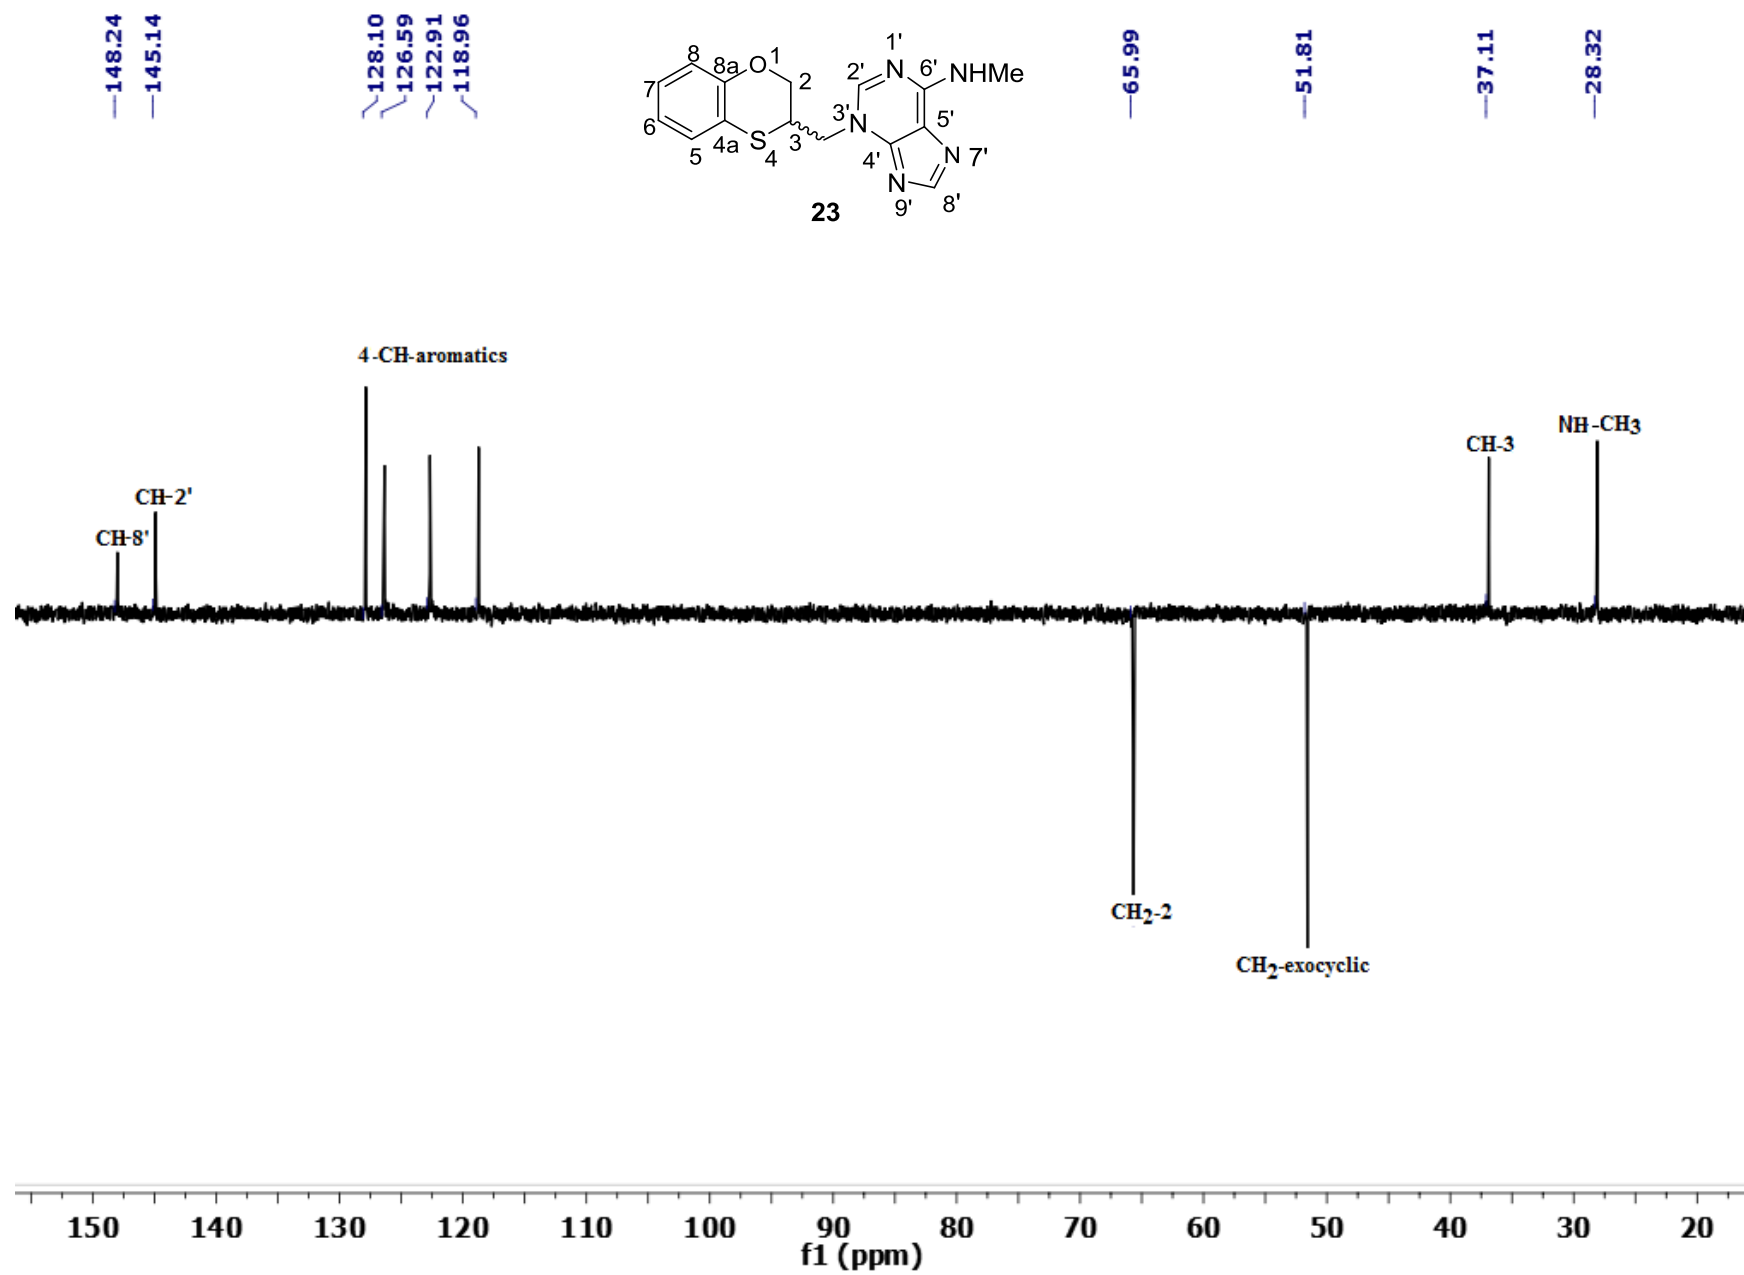

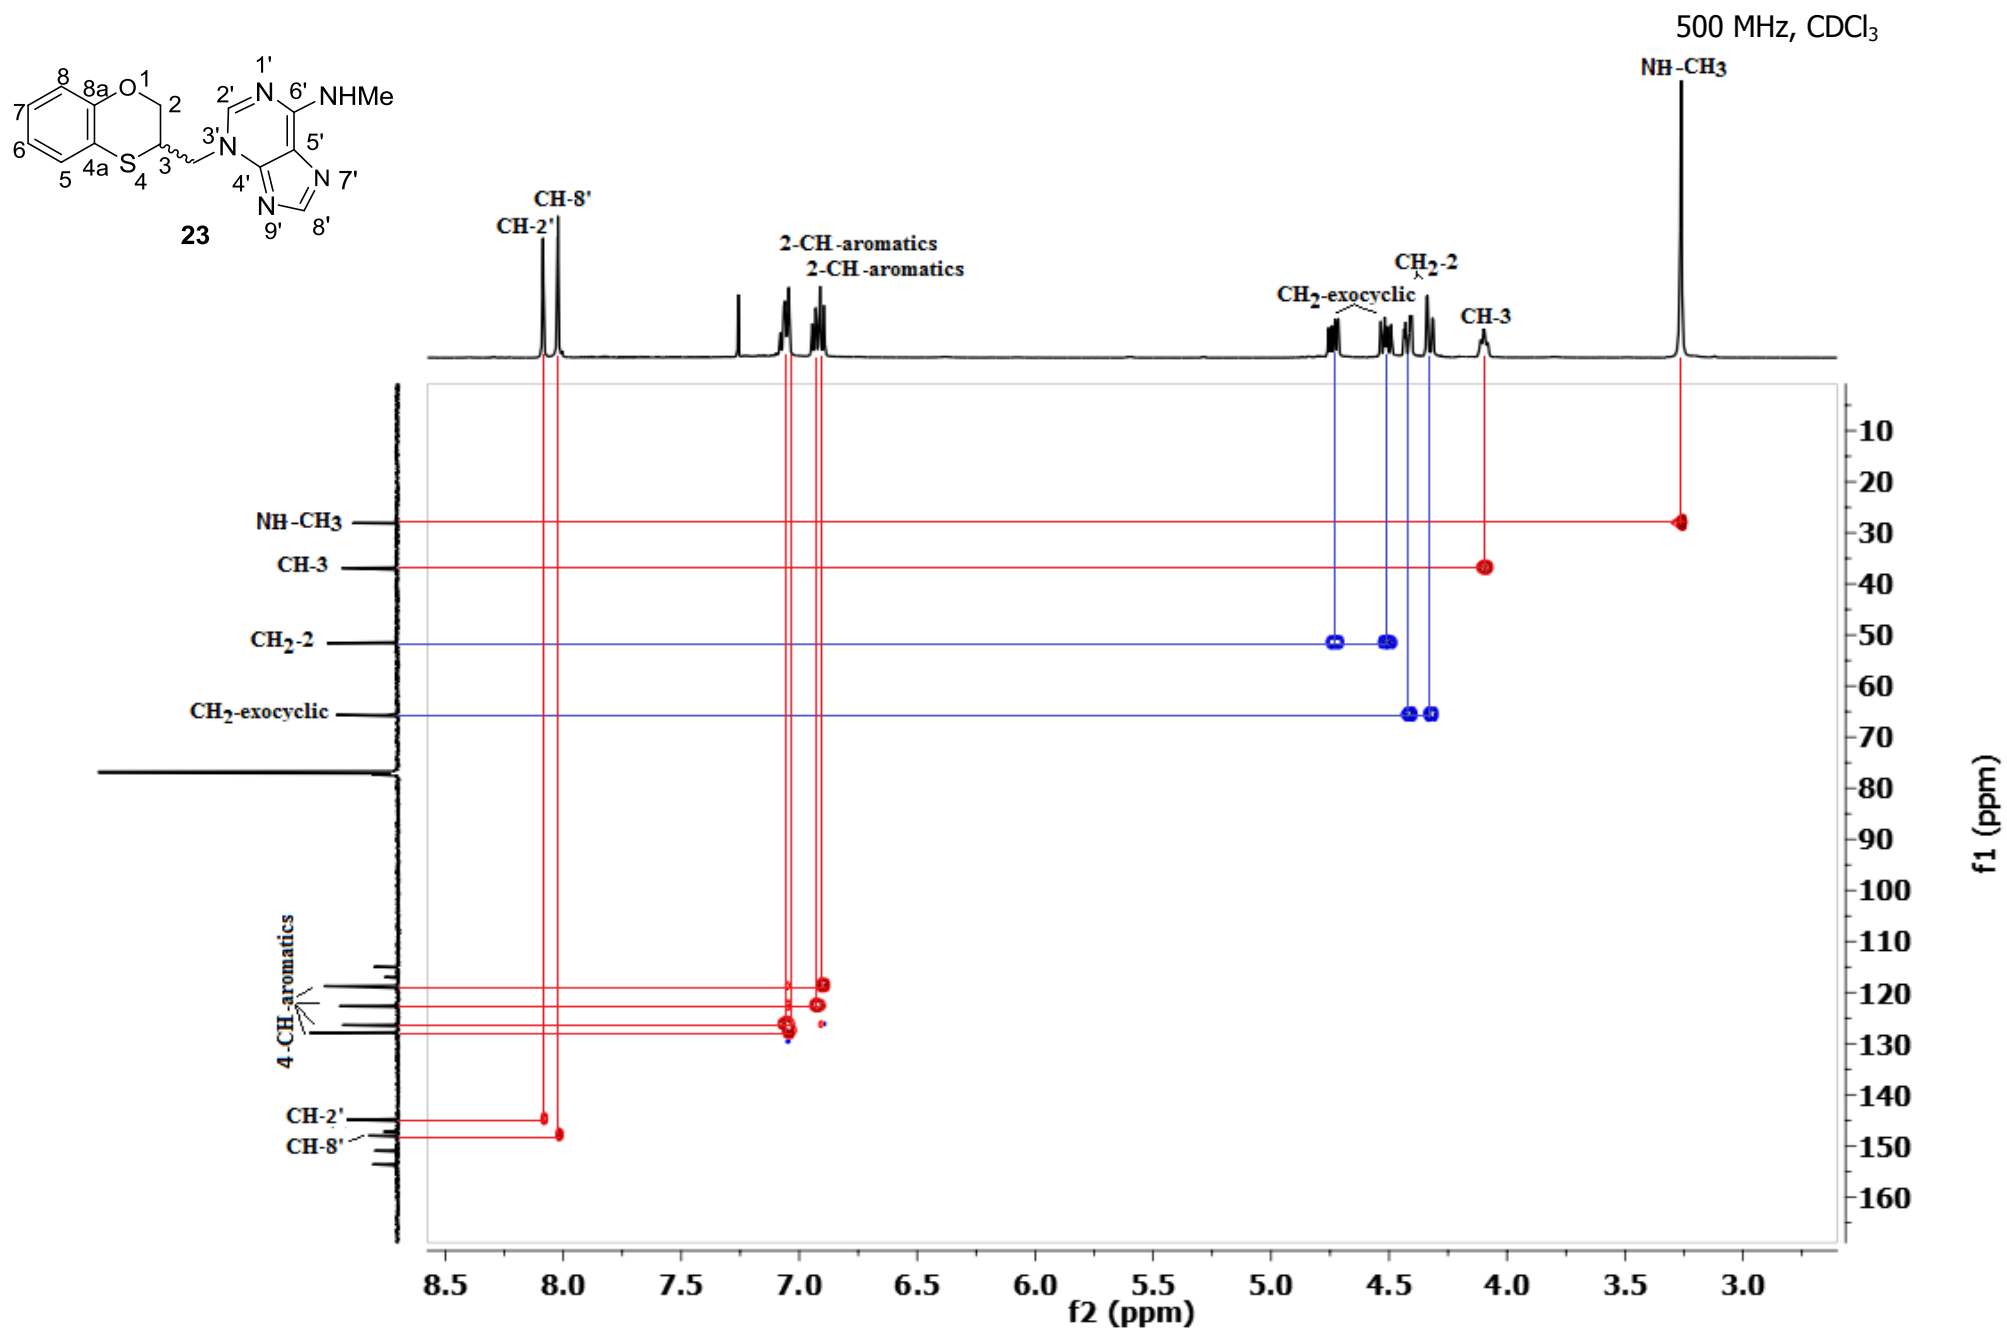

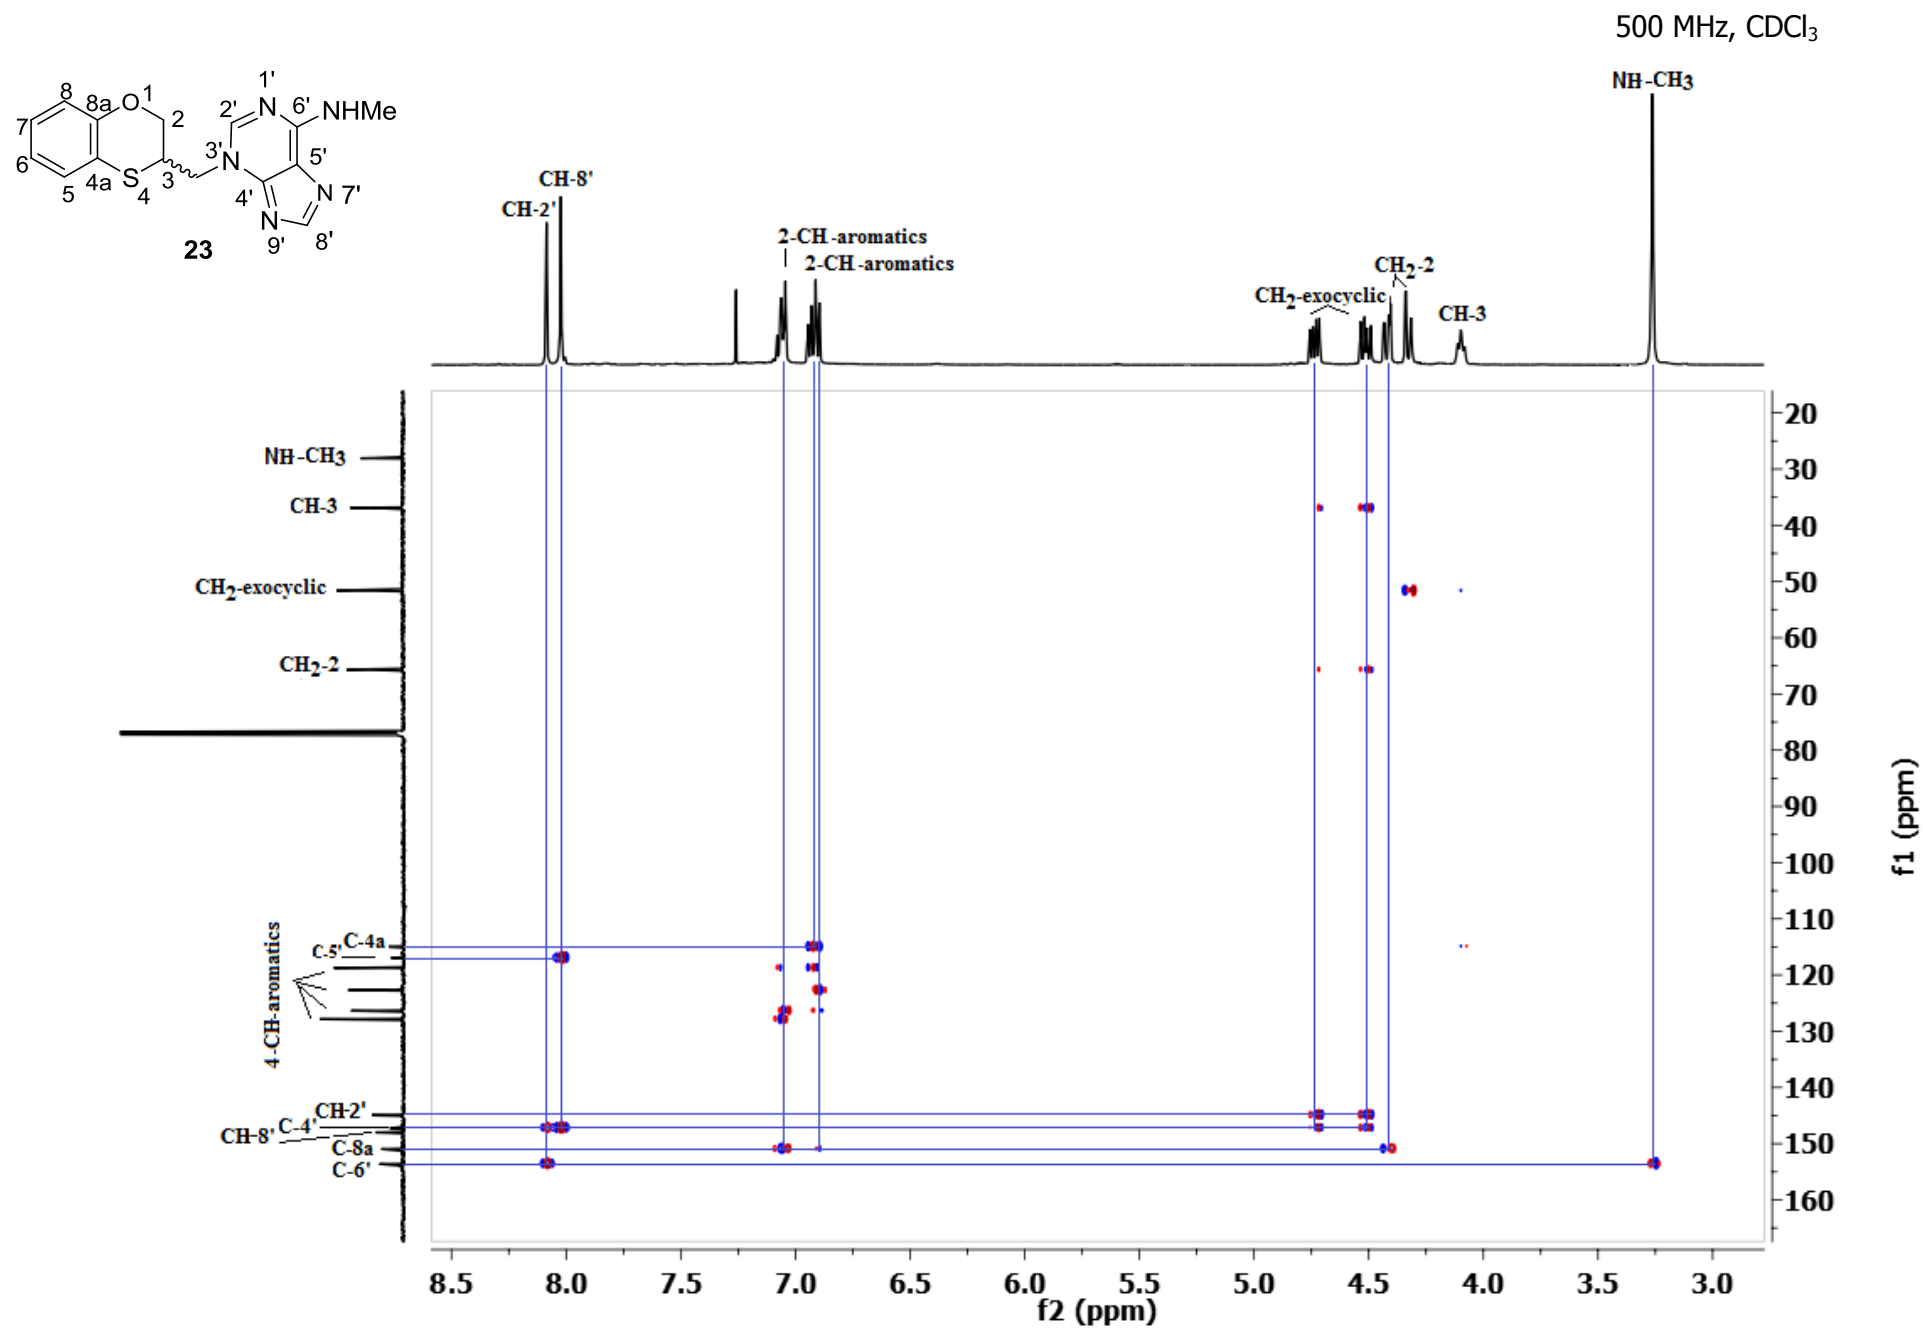

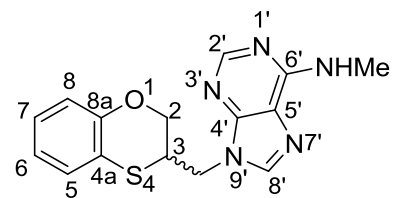

24

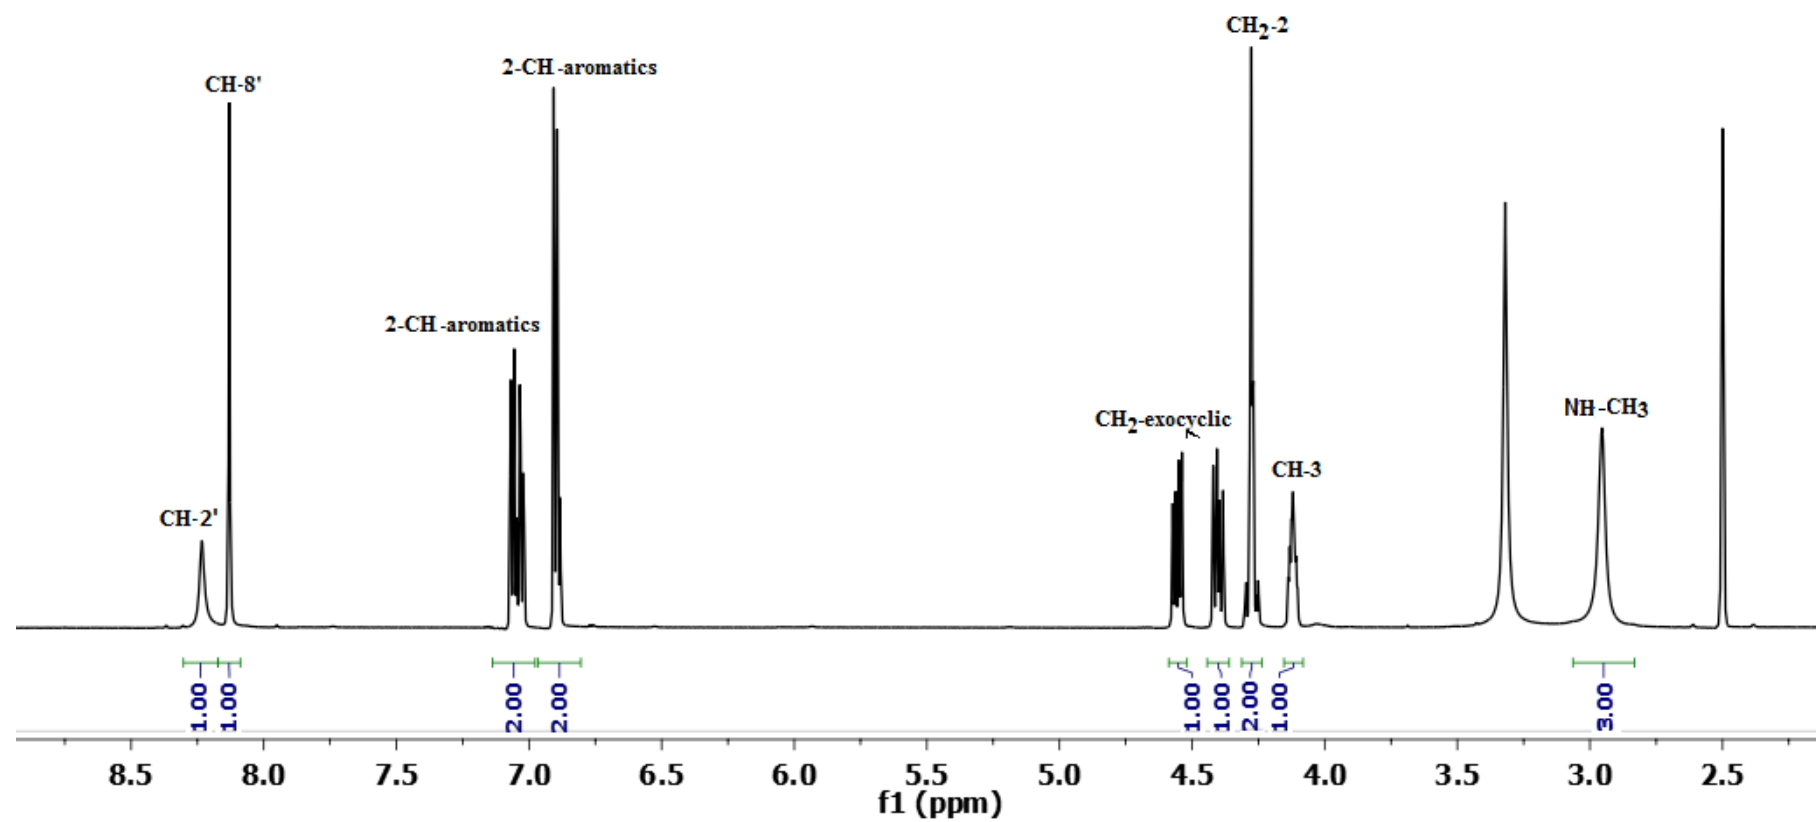

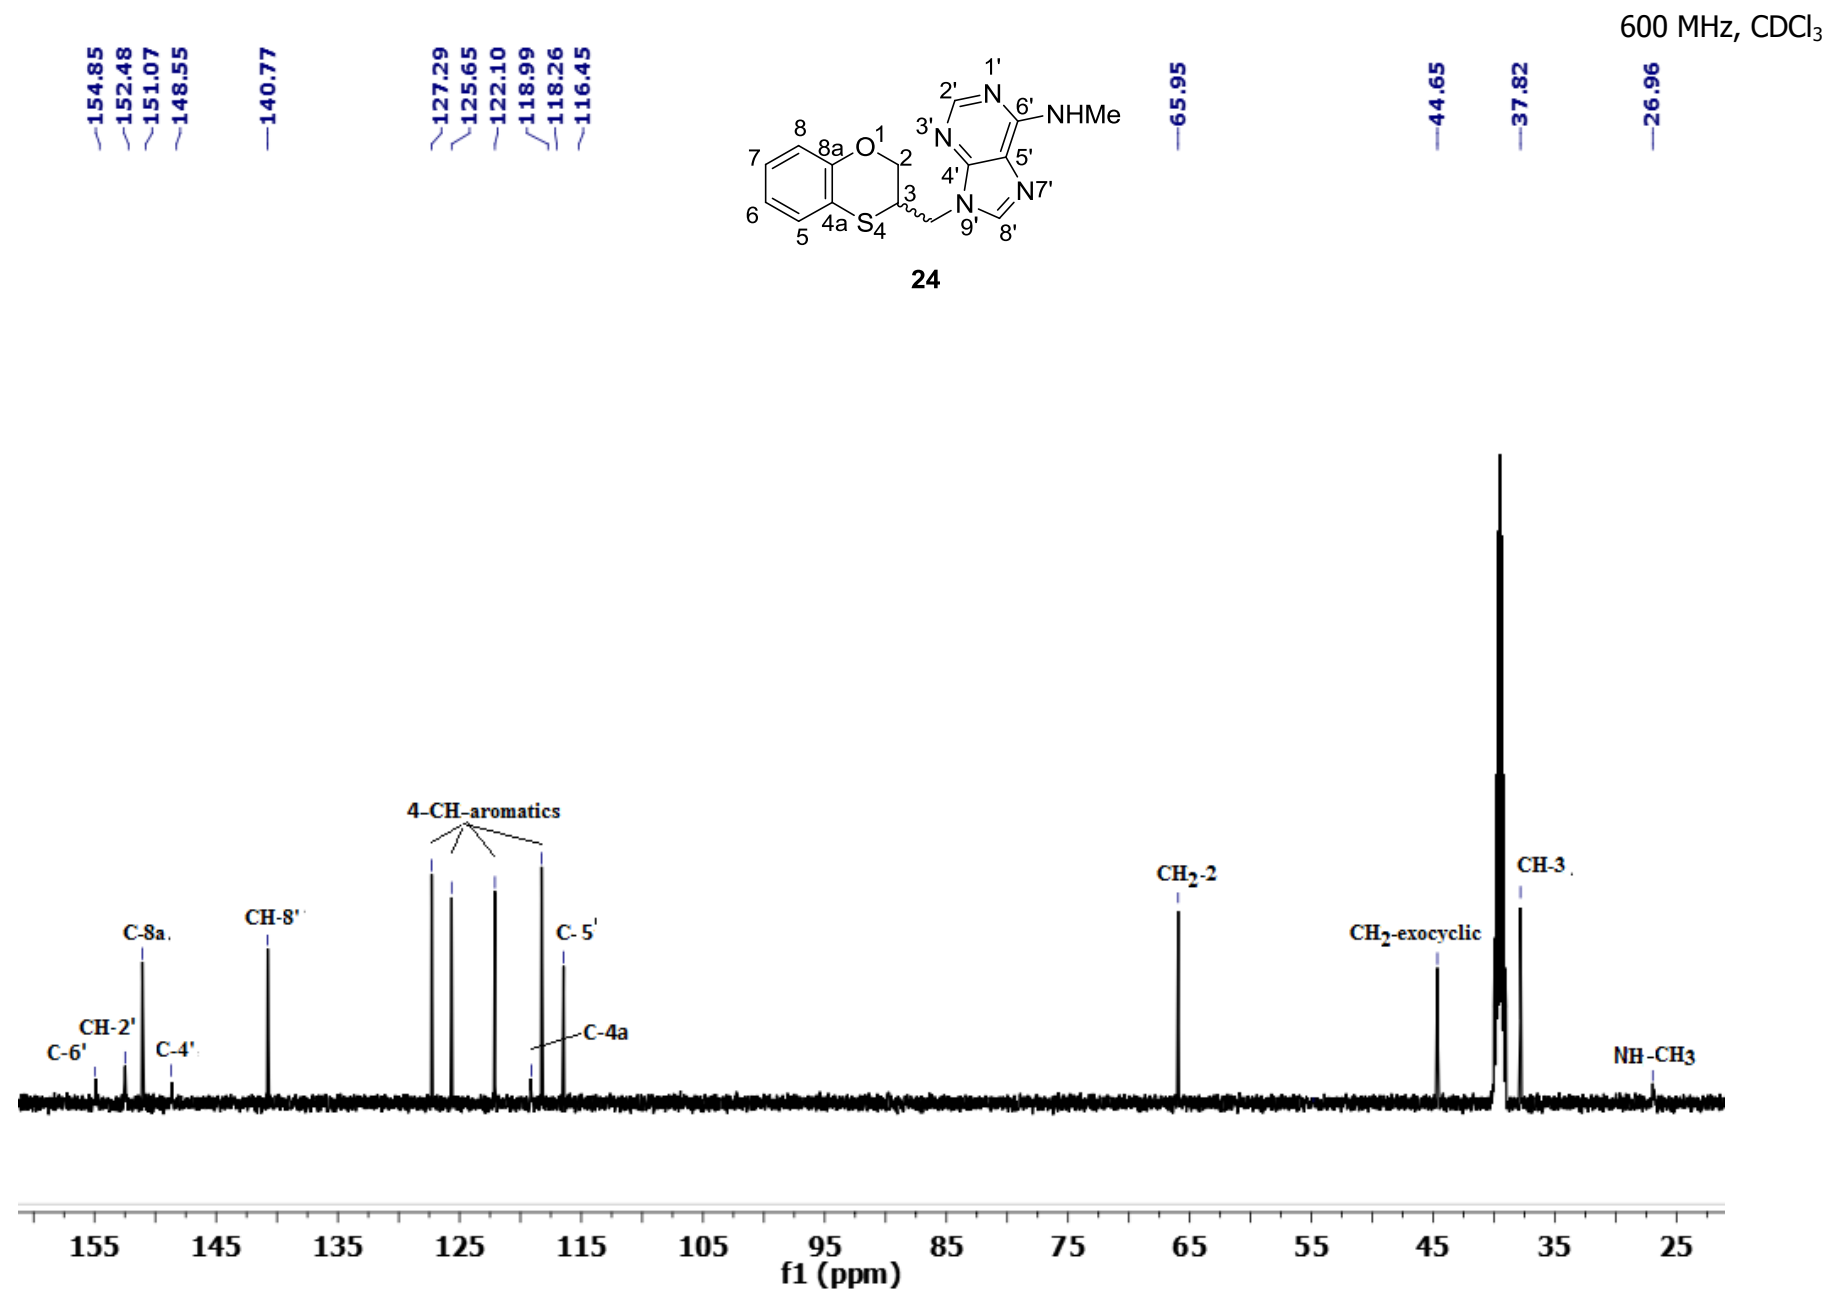



600 MHz, CDCl<sub>3</sub>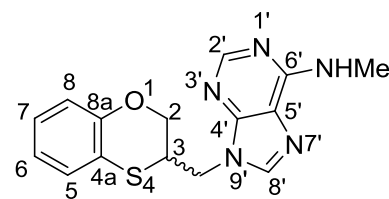

24

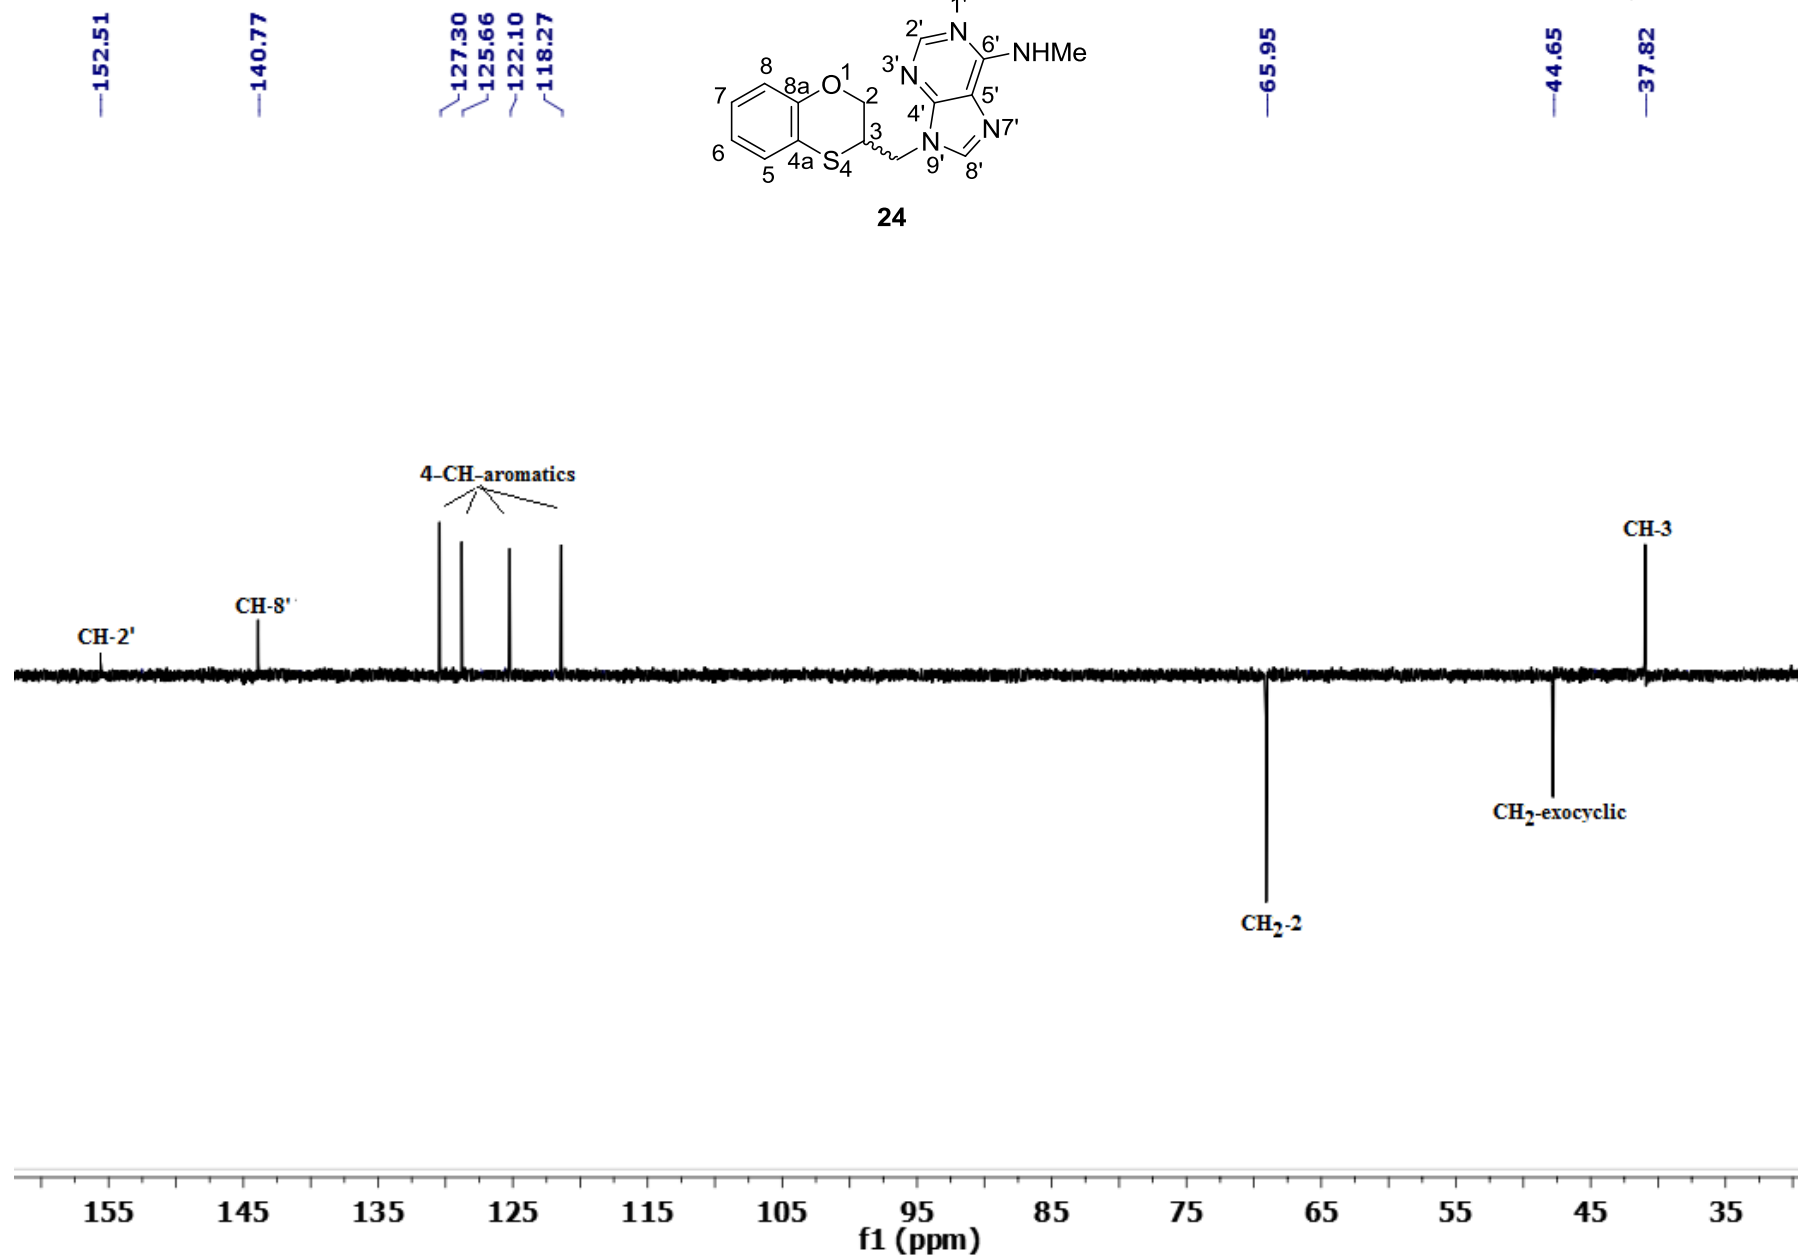

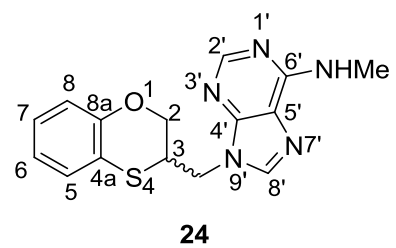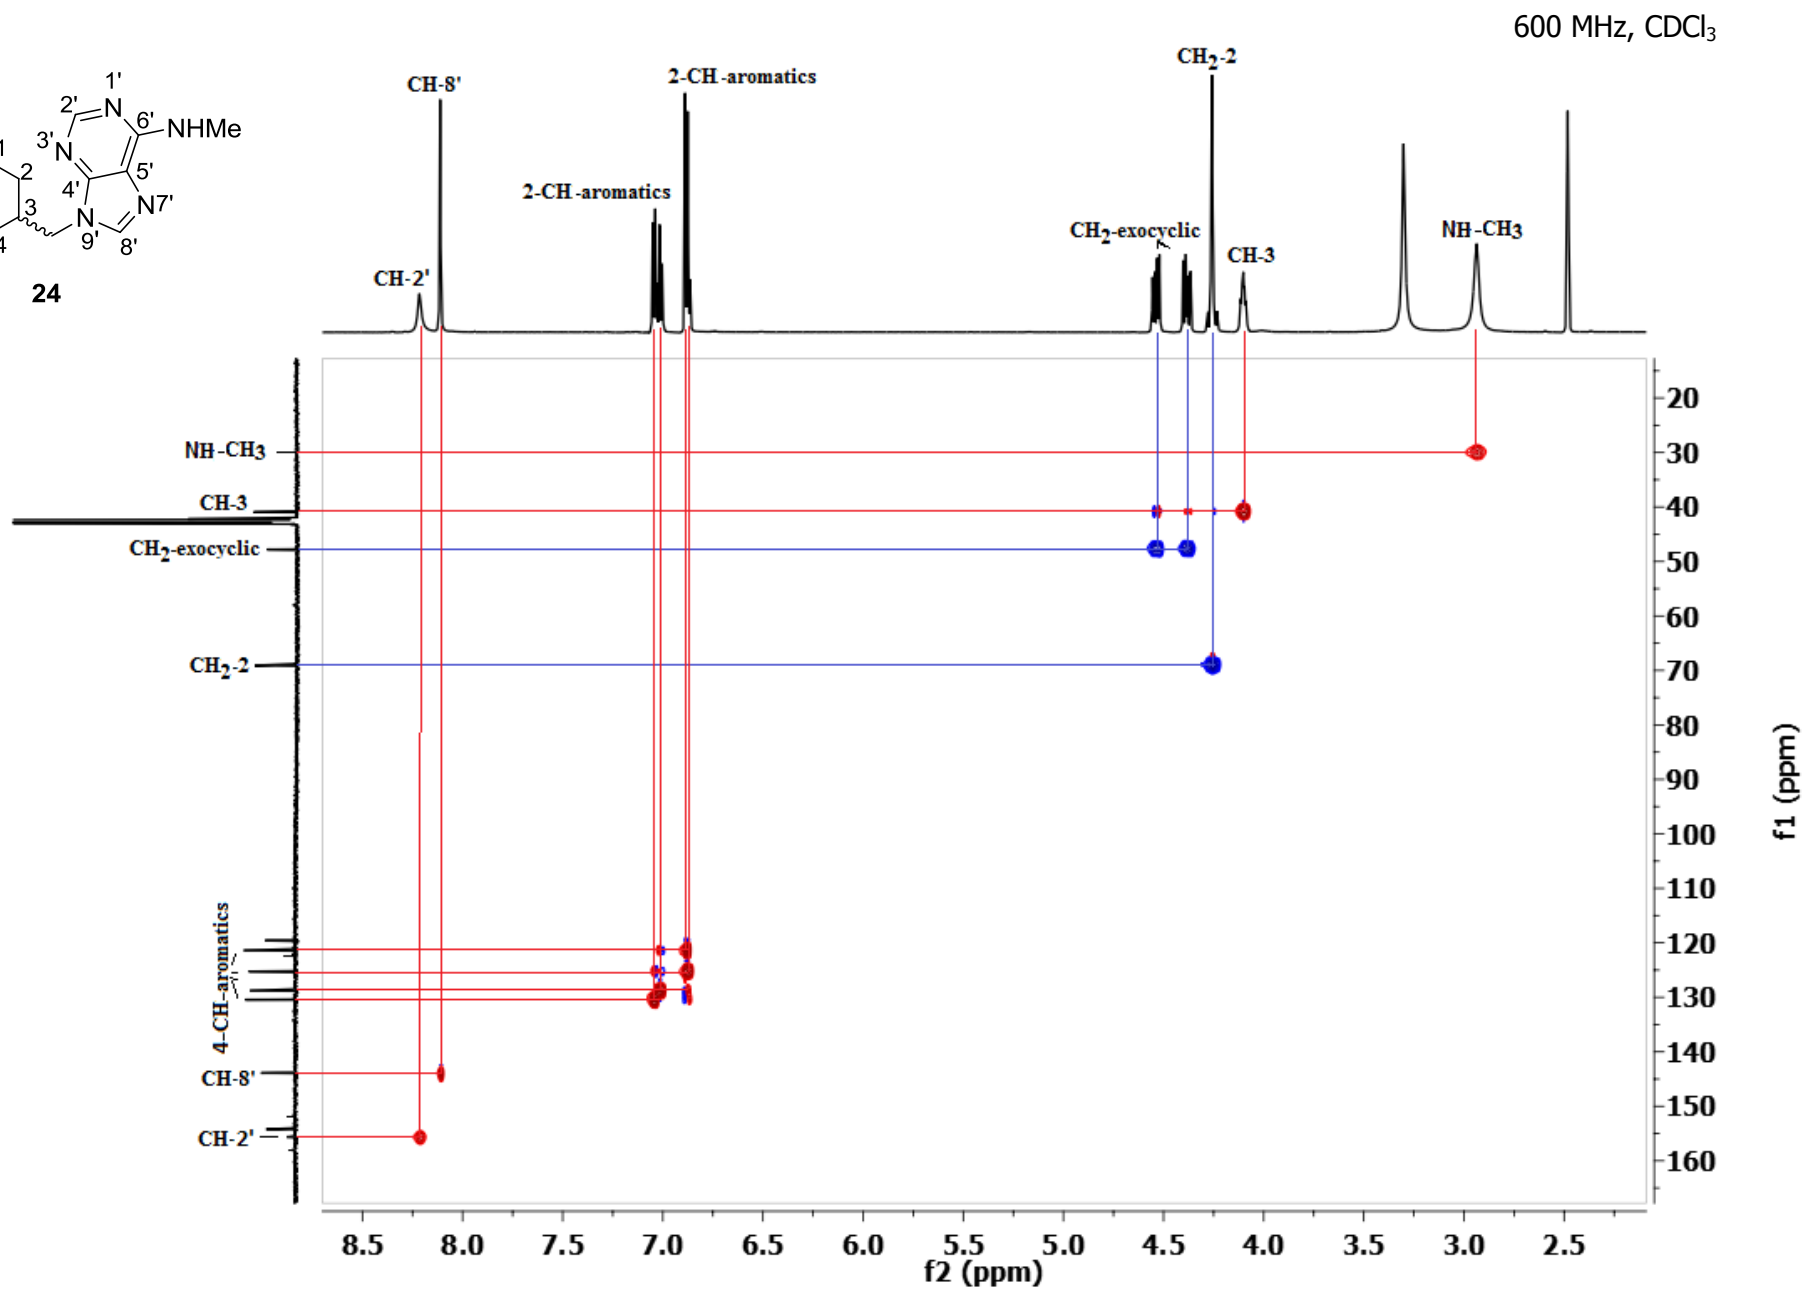

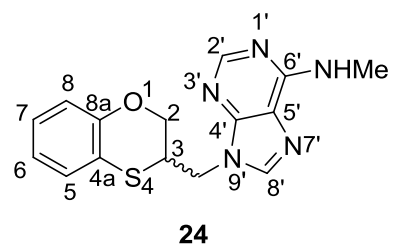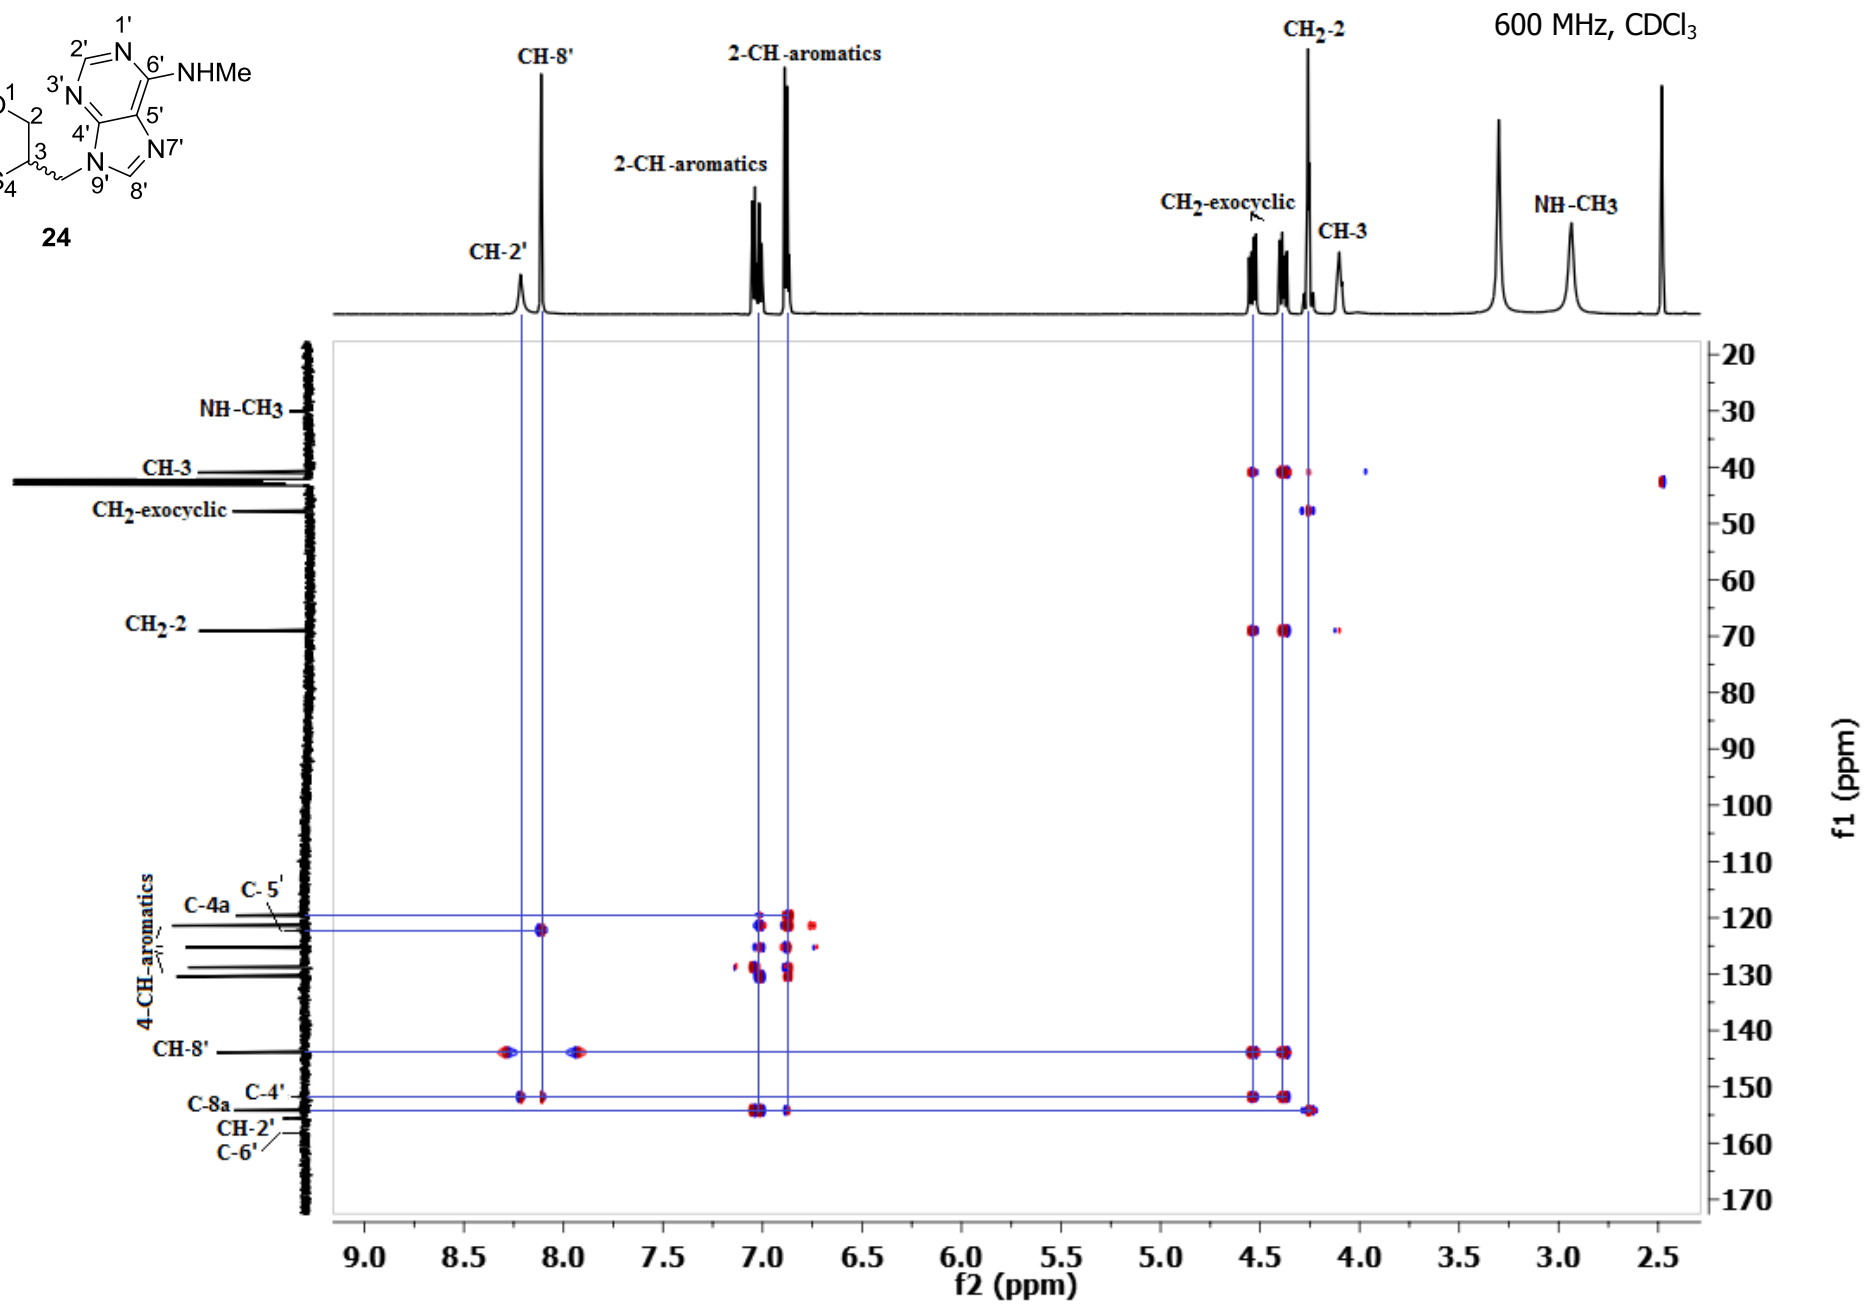

## Structure of (*RS*)-17

Figures S24 and S25 display the X-ray diffraction of (*RS*)-17. The crystal packing in (*RS*)-17 reveals that pairs of molecules form a dimeric structure by two symmetry-related  $\text{C-H}\cdots\pi$  interactions involving the  $\text{C10-H10A}$  and the five-membered ring of the purine moiety of (*RS*)-17 ( $\text{C-H}\cdots$ centroid distance:  $2.90\text{ \AA}$  and  $\text{C-H}\cdots$ centroid angle:  $151.0^\circ$ ). In addition, there are additional  $\text{C-H}\cdots\pi$  interactions connecting dimers involving the  $\text{C22-H22B}$  bond and the six-membered aromatic ring of the 2,3-dihydro-1,4-benzoxathiin moiety ( $\text{C-H}\cdots$ centroid distance:  $2.64\text{ \AA}$  and  $\text{C-H}\cdots$ centroid angle:  $166.0^\circ$ ). Therefore these  $\text{C-H}\cdots\pi$  interactions build infinite chains. The cooperative effect of non-classical H-bond interactions ( $\text{C22-H22A}\cdots\text{N1}$ ,  $3.459\text{ \AA}$  and  $149.0^\circ$ ) generates the 3D supramolecular architecture in the crystal.

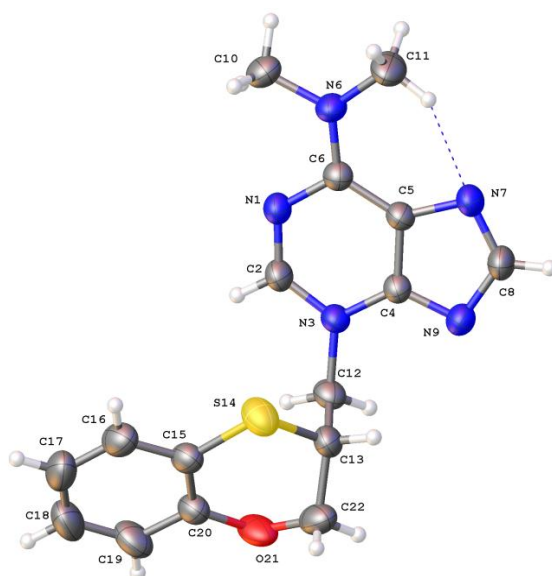

**Figure S24.** Molecular structure of (*RS*)-17. Hydrogen atoms are drawn as spheres of arbitrary radius. Ellipsoids of the non-hydrogen atoms are drawn at the 50% probability level.

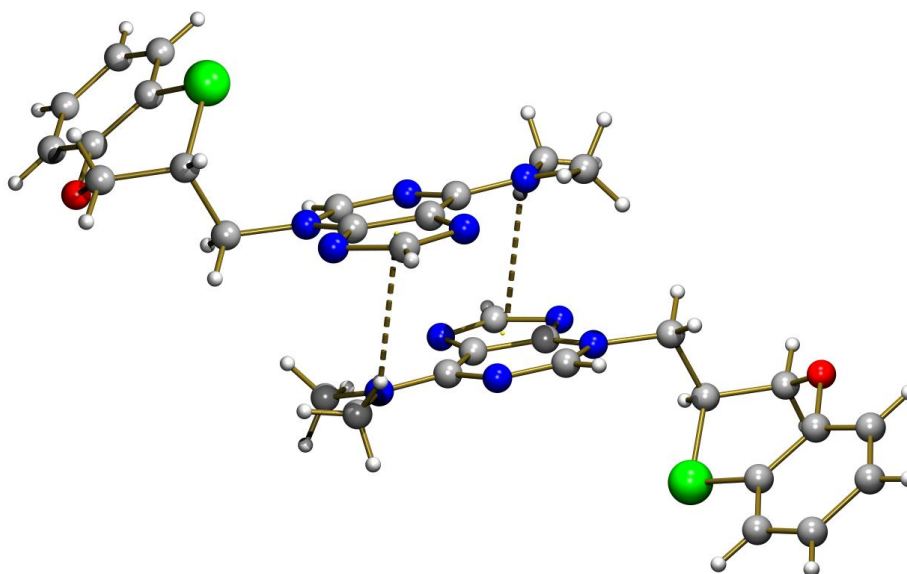

**Figure S25.** Detail of the dimeric structure of (*RS*)-**17** built by base pairing through --C-H $\cdots$  $\pi$  interactions.

### Structure of (*R*)-**22**

Figures S26 and S27 show the X-ray structure of (*R*)-**22**. The crystal of (*R*)-**22** builds ribbons running along the *a* axis by intermolecular H-bonding interactions between adjacent (*R*)-**22** molecules by  $\text{--N-H}\cdots\text{O}$ (2,3-dihydro-1,4-benzoxathiin moiety) interactions (2.985(5)Å, 139.64°). These ribbons are stabilized by  $\text{--C-H}\cdots\pi$ , involving the  $\text{--C21-H21A}$  bond and the six membered aromatic ring of the 2,3-dihydro-1,4-benzoxathiin moiety (C-H $\cdots$ centroid distance: 2.62 Å and C-H $\cdots$ centroid angle: 168.0°) and non-classical  $\text{--C-H}\cdots\text{N}$  hydrogen interactions (C8-H8 $\cdots$ N7, 3.311(6) Å, 153°). These ribbons are associated by  $\text{--C-H}\cdots\text{Cl}$  interactions (3.559 Å, 125.11°) to build the 3D network.

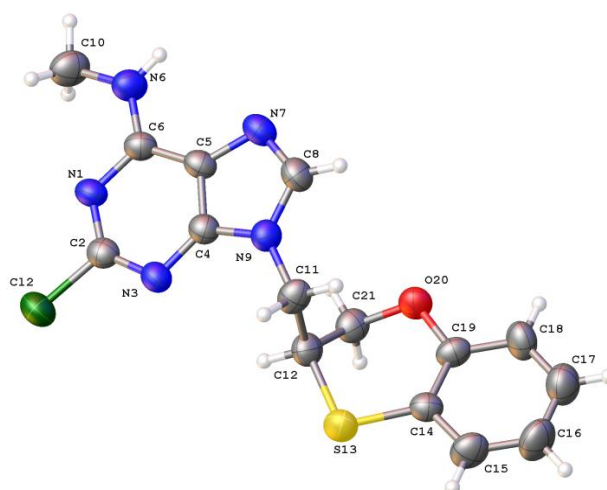

**Figure S26.** Molecular structure of (*R*)-**22**. Hydrogen atoms are drawn as spheres of arbitrary radius. Ellipsoids of the non-hydrogen atoms are drawn at the 50% probability level.

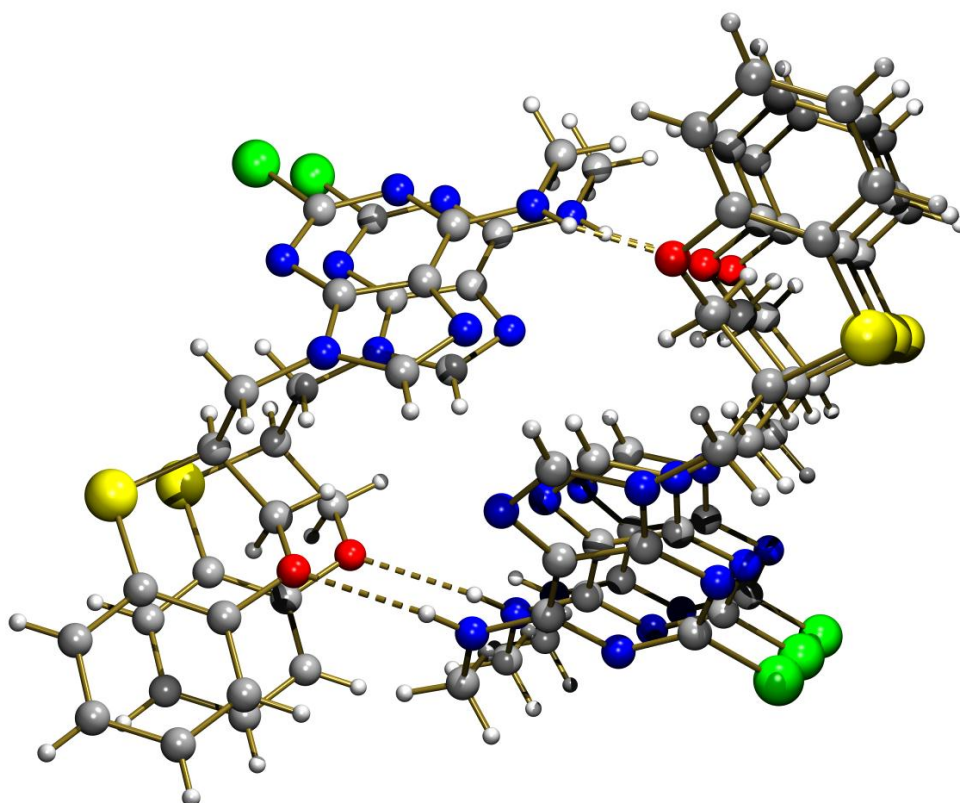

**Figure S27.** Fragment of a ribbon built by base pairing through -N-H $\cdots$ O interactions

## X-ray structure of (*RS*)-24

Figures S28 and S29 display the X-ray diffraction of (*RS*)-24. In the crystal of (*RS*)-24, pairs of adjacent (*RS*)-24 molecules are H-bonded by intermolecular symmetric interactions  $\text{-N-H}\cdots\text{N}$ (imidazole) (3.07 Å, 149.0°).  $\pi,\pi$ -stacking interactions are observed between five- and six-membered rings (purine moiety) of anti-parallel neighbouring (*RS*)-24 molecules (centroid-centroid distances: 3.786 and 3.527 Å) connecting pairs and generating a ribbon structure running along the *a* axis. Ribbons are associated by  $\text{C-H}\cdots\pi$  interactions (C-H $\cdots$  six-membered aromatic ring of the 2,3-dihydro-1,4-benzoxathiin moiety: C-H $\cdots$ centroid distance: 2.74 and 2.67 Å and C-H $\cdots$ centroid angle: 161.0 and 173°) giving rise to two-dimensional frameworks parallel to the *ab* plane. Finally, additional C-H $\cdots\pi$  interactions involving the  $\text{-C47-H47}$  bond and the six membered aromatic ring of the purine moiety (C-H $\cdots$ centroid distance: 2.74 Å and C-H $\cdots$ centroid angle: 173.0°) cooperate to reach the 3D structure.

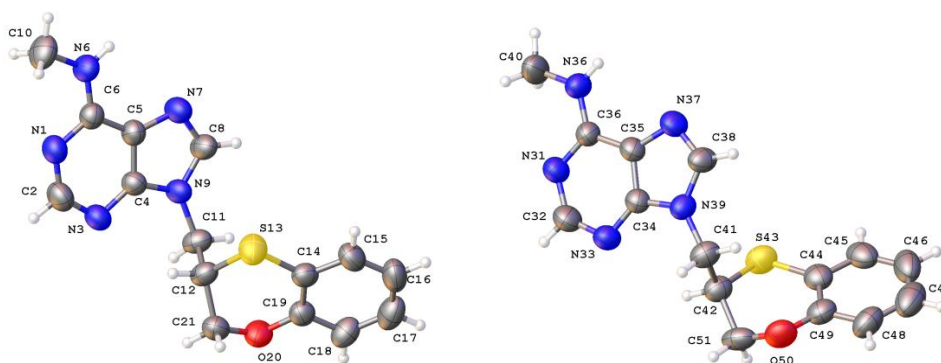

**Figure S28.** Molecular structure of (*RS*)-24. Hydrogen atoms are drawn as spheres of arbitrary radius. Ellipsoids of the non-hydrogen atoms are drawn at the 50% probability level.

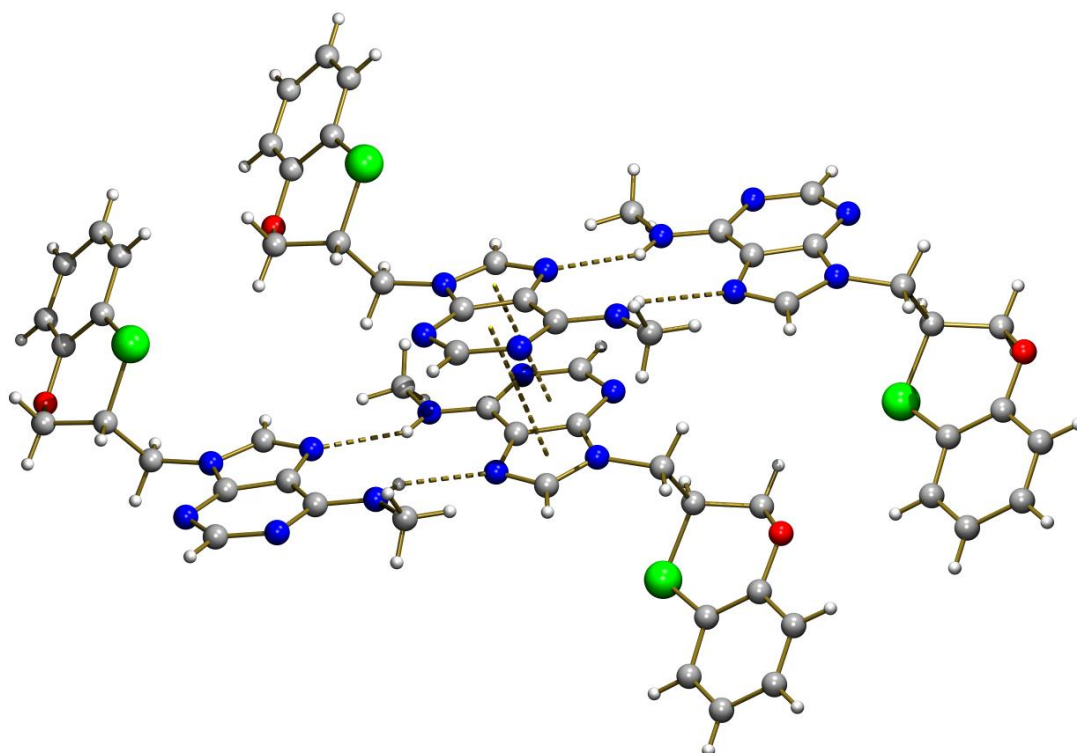

**Figure S29.** Fragment of a ribbon structure built by base pairing through symmetric N–H···N interactions and  $\pi,\pi$ -stacking interactions involving aromatic rings of the purine moiety of *(RS)*-**24**.

## REFERENCES

- [1] BRUKER, APEX2 Software, Bruker AXS Inc, Madison, Wisconsin, USA, **2010**.
- [2] Sheldrick, G.M. A short history of SHELX. *Acta Cryst.*, **2008**, *A64*, 112–122.
